# Supplementary material for: KRAS-dependent sorting of miRNA to exosomes
Source: eLife journal article supplement (doi:10.7554/elife.07197), 2015-07-01
Supplement: supp [file elife-07197-supp-v1.zip]

Archive with 15 entries (15 files):
- elife_poa_e07197_Figure_1_figure_supplement_1.pdf
- elife_poa_e07197_Figure_2_figure_supplement_1.pdf
- elife_poa_e07197_Figure_6_figure_supplement_3.pdf
- elife_poa_e07197_Figure_6_figure_supplement_1.pdf
- elife_poa_e07197_Figure_2_figure_supplement_4.pdf
- elife_poa_e07197_Figure_4_figure_supplement_3.pdf
- elife_poa_e07197_Supplementary_File_1.xlsx
- elife_poa_e07197_Figure_4_figure_supplement_2.pdf
- elife_poa_e07197_Figure_2_figure_supplement_2.pdf
- elife_poa_e07197_Figure_4_figure_supplement_1.pdf
- elife_poa_e07197_Figure_1_source_data_1.docx
- elife_poa_e07197_Figure_6_figure_supplement_2.pdf
- elife_poa_e07197_Figure_2_figure_supplement_3.pdf
- elife_poa_e07197_Supplementary_File_3.docx
- elife_poa_e07197_Supplementary_File_2.xlsx
