# Supplementary material for: KRAS-dependent sorting of miRNA to exosomes
Source: eLife journal article supplement (doi:10.7554/elife.07197), 2015-07-01
Supplement: supp [file elife-07197-supp-v1.zip › elife_poa_e07197_Figure_1_source_data_1.docx]

**Figure 1-source data 1**

| Cell line | *KRAS* allele | Growth in soft agar | Tumors in nude mice |
| --- | --- | --- | --- |
| DLD-1 | WT/G13D | Yes | Yes |
| DKs-8 | WT | No | No |
| DKO-1 | G13D | Yes | Yes |

**Figure 1-source data 1. Colorectal cancer cell lines.**

Small RNA sequencing libraries were prepared from three isogenic colorectal cancer cell lines with the indicated alleles of KRAS. Table is based on work done in 21.
