# Supplementary material for: KRAS-dependent sorting of miRNA to exosomes
Source: eLife journal article supplement (doi:10.7554/elife.07197), 2015-07-01
Supplement: supp [file elife-07197-supp-v1.zip › elife_poa_e07197_Figure_2_figure_supplement_1.pdf]

|                                                                                                    |      |      |      |      |      |      |      |      |      |      |      |      |      |      |      |      |      |
|----------------------------------------------------------------------------------------------------|------|------|------|------|------|------|------|------|------|------|------|------|------|------|------|------|------|
| DKO-1<br>Cell 1                                                                                    | 0.95 | 0.95 | 0.81 | 0.79 | 0.67 | 0.94 | 0.93 | 0.92 | 0.67 | 0.64 | 0.70 | 0.95 | 0.95 | 0.95 | 0.67 | 0.64 | 0.69 |
| 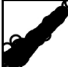 DKO-1<br>Cell 2    | 0.96 | 0.80 | 0.79 | 0.68 | 0.94 | 0.94 | 0.93 | 0.67 | 0.64 | 0.70 | 0.95 | 0.96 | 0.95 | 0.68 | 0.65 | 0.70 |      |
| 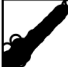 DKO-1<br>Cell 3   | 0.80 | 0.78 | 0.67 | 0.94 | 0.94 | 0.93 | 0.67 | 0.64 | 0.70 | 0.95 | 0.96 | 0.95 | 0.67 | 0.64 | 0.69 |      |      |
| 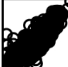 DKO-1<br>Exo 1    | 0.86 | 0.74 | 0.79 | 0.78 | 0.77 | 0.72 | 0.72 | 0.76 | 0.79 | 0.80 | 0.80 | 0.75 | 0.72 | 0.77 |      |      |      |
| 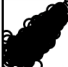 DKO-1<br>Exo 2    | 0.75 | 0.78 | 0.77 | 0.77 | 0.74 | 0.72 | 0.77 | 0.78 | 0.79 | 0.79 | 0.77 | 0.73 | 0.79 |      |      |      |      |
| 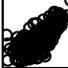 DKO-1<br>Exo 3    | 0.66 | 0.66 | 0.67 | 0.74 | 0.73 | 0.75 | 0.67 | 0.67 | 0.67 | 0.78 | 0.77 | 0.77 |      |      |      |      |      |
| 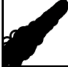 DKs-8<br>Cell 1   | 0.96 | 0.95 | 0.68 | 0.65 | 0.70 | 0.95 | 0.95 | 0.95 | 0.66 | 0.63 | 0.68 |      |      |      |      |      |      |
| 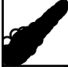 DKs-8<br>Cell 2   | 0.95 | 0.68 | 0.65 | 0.71 | 0.95 | 0.94 | 0.94 | 0.66 | 0.63 | 0.69 |      |      |      |      |      |      |      |
| 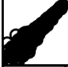 DKs-8<br>Cell 3   | 0.68 | 0.64 | 0.70 | 0.94 | 0.94 | 0.94 | 0.66 | 0.63 | 0.68 |      |      |      |      |      |      |      |      |
| 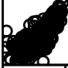 DKs-8<br>Exo 1    | 0.80 | 0.80 | 0.67 | 0.67 | 0.66 | 0.74 | 0.75 | 0.75 |      |      |      |      |      |      |      |      |      |
| 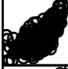 DKs-8<br>Exo 2    | 0.78 | 0.64 | 0.64 | 0.63 | 0.75 | 0.76 | 0.77 |      |      |      |      |      |      |      |      |      |      |
| 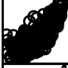 DKs-8<br>Exo 3    | 0.70 | 0.70 | 0.70 | 0.78 | 0.76 | 0.80 |      |      |      |      |      |      |      |      |      |      |      |
| 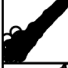 DLD-1<br>Cell 1   | 0.96 | 0.96 | 0.67 | 0.64 | 0.69 |      |      |      |      |      |      |      |      |      |      |      |      |
| 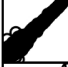 DLD-1<br>Cell 2  | 0.96 | 0.67 | 0.64 | 0.69 |      |      |      |      |      |      |      |      |      |      |      |      |      |
| 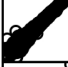 DLD-1<br>Cell 3 | 0.67 | 0.64 | 0.69 |      |      |      |      |      |      |      |      |      |      |      |      |      |      |
| 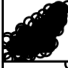 DLD-1<br>Exo 1  | 0.79 | 0.83 |      |      |      |      |      |      |      |      |      |      |      |      |      |      |      |
| 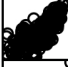 DLD-1<br>Exo 2  | 0.80 |      |      |      |      |      |      |      |      |      |      |      |      |      |      |      |      |
| 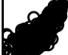 DLD-1<br>Exo 3  |      |      |      |      |      |      |      |      |      |      |      |      |      |      |      |      |      |
