# Supplementary material for: KRAS-dependent sorting of miRNA to exosomes
Source: eLife journal article supplement (doi:10.7554/elife.07197), 2015-07-01

Rpm comparison between DKO-1  
cell and exosomes

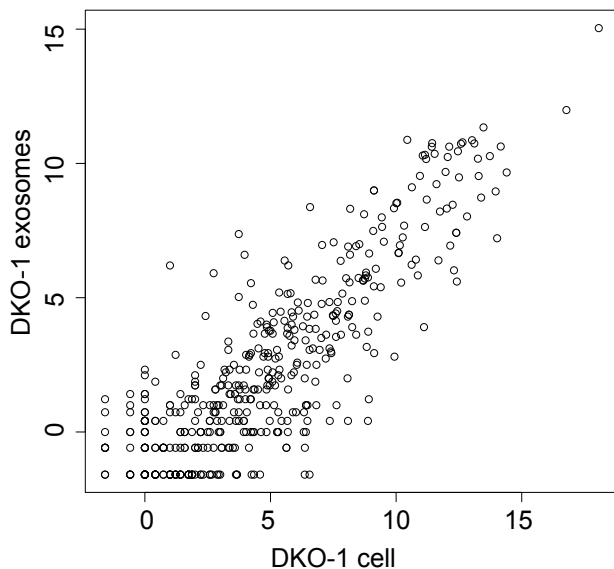

Rpm comparison between DKs-8  
cell and exosomes

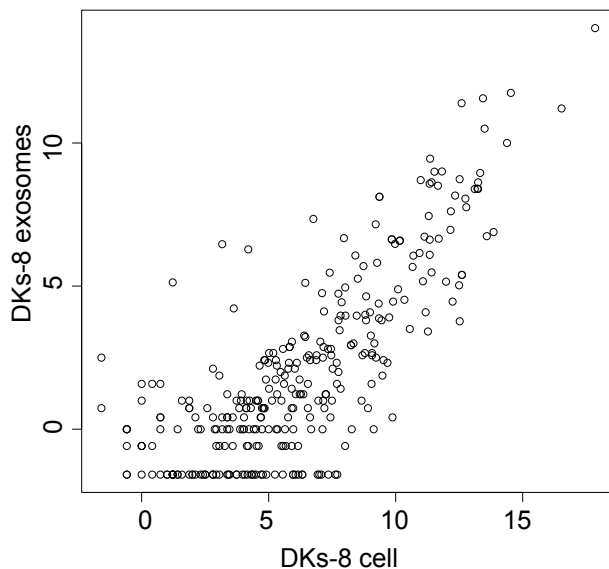

Rpm comparison between DLD-1  
cell and exosomes

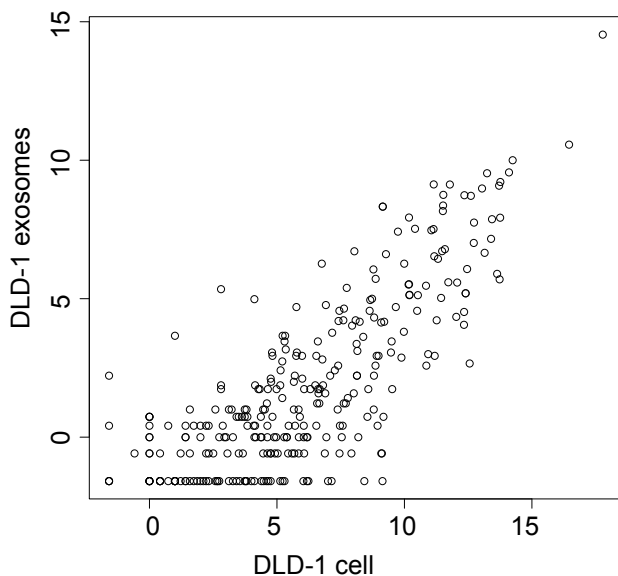

Supplement: supp [file elife-07197-supp-v1.zip › elife_poa_e07197_Figure_2_figure_supplement_4.pdf]
