# Supplementary material for: KRAS-dependent sorting of miRNA to exosomes
Source: eLife journal article supplement (doi:10.7554/elife.07197), 2015-07-01
Supplement: supp [file elife-07197-supp-v1.zip › elife_poa_e07197_Figure_6_figure_supplement_1.pdf]

|        |                                | Position  | Score  | MFE    |
|--------|--------------------------------|-----------|--------|--------|
| miRNA  | 3' guGUUCAAGCCUAGAUGCCCAa 5'   |           |        |        |
|        | :       :                      |           |        |        |
| Target | 5' caTAACTTTAGAAATACGGGTt 3'   | 284 - 305 | 160.00 | -15.20 |
| miRNA  | 3' guguucaagccuagaUGCCCAa 5'   |           |        |        |
|        | :                              |           |        |        |
| Target | 5' gttgctcctctcaacATGGGTa 3'   | 363 - 384 | 104.00 | -6.60  |
| miRNA  | 3' gugUUCAAGCCUA-G-AUGCCCAa 5' |           |        |        |
|        | :      :                       |           |        |        |
| Target | 5' gggAAGGTCTGGTACATATTGaa 3'  | 810 - 833 | 91.00  | -7.50  |
