# Supplementary material for: KRAS-dependent sorting of miRNA to exosomes
Source: eLife journal article supplement (doi:10.7554/elife.07197), 2015-07-01
Supplement: supp [file elife-07197-supp-v1.zip › elife_poa_e07197_Supplementary_File_1.xlsx]

## Sheet: Supp File 1A. mature_miRNAs
Supplemental File 1A. Read counts on mature miRNAs
idx	DKO1.cell.1	DKO1.cell.2	DKO1.cell.3	DKO1.exo.1	DKO1.exo.2	DKO1.exo.3	DKS8.cell.1	DKS8.cell.2	DKS8.cell.3	DKS8.exo.1	DKS8.exo.2	DKS8.exo.3	DLD1.cell.1	DLD1.cell.2	DLD1.cell.3	DLD1.exo.1	DLD1.exo.2	DLD1.exo.3
hsa-miR-576-3p	798.922	679.034	433.72	65.746	33.6218	34.3031	1660.1	828.713	603.185	17.6917	4.87917	16.5747	695.241	1562	701.553	2.44167	1.8625	5.75
hsa-miR-140-5p	5334.33	3889.33	3104.9	131.143	141.5	54.5	11994	6358.17	4782.91	13	7	31	5107.17	8943.67	6736.17	4	8	5
hsa-miR-2682-5p	0	1	0	0	0	0	0	2	1	0	0	0	0	0	1	0	0	0
hsa-miR-522-5p	4.33333	3.66667	3.2	1.5	0.833333	0	1.66667	1.47619	1.30952	0	0	0	1	2.16667	2.30952	0	0	0
hsa-miR-4743-3p	2	1	0	0	1	0	2	1	1	0	0	0	2	4	2	0	0	0
hsa-miR-548ao-3p	0	0	0	0	0	0	0	0	0	0	0	0	0	0	1	0	0	0
hsa-miR-548av-5p	1	0.5	0	0	0.5	0	0	1	0.809524	0	0	0	3	1.5	0.5	0	0	0
hsa-miR-30d-5p	180623	149459	149253	12971.9	14191.4	8047.41	308874	200746	141755	1878.67	1279	4089.42	179865	253391	174379	3880.25	3115.47	4571.92
hsa-miR-518d-5p	1.91667	1.4	0.85	0.45	0	0	0.4	0.2	0.85	0	0	0	0.25	1.725	0.4	0	0	0
hsa-miR-637	0	0	0	0	0	0	0	0	0	0	0	0	0	0	0	0.333333	0	0
hsa-miR-4740-5p	0	0	0	0	0.5	0	0	0	0	0	0	0	2	0	0	0	0	0
hsa-miR-3622b-3p	10.8333	6.5	6.33333	1	0.0909091	2.33333	14.5	6.33333	3	0	0	0	8	19	10.3333	0	0	0
hsa-miR-520b	10.3333	6.33333	8.66667	0	0.5	0	1	1	1.83333	0	0	0	3.5	8.5	7	0	0	0
hsa-miR-3622a-5p	10.8333	6.5	6.33333	1	0.0909091	2.33333	14.5	6.33333	3	0	0	0	8	19	10.3333	0	0	0
hsa-miR-3690	2.28571	1.5	2	0	0	1.5	11	9	5.5	0	0	0	1	3.5	1	0	0	0
hsa-miR-34b-5p	0	0	0	0	0	0	0	1	0	0	0	0	0	0	0	0	0	0
hsa-miR-381-3p	6	35.5	19.1667	4	5	0	83.4444	77.8333	41.5	1	0	0	37.5	51.8333	42.3333	0	0	0
hsa-miR-4709-3p	3	4	4	0.5	4	0	12.05	10	2	0	0	1	6	5	6	0.125	0	2
hsa-miR-518a-3p	2	0	2	1	1	0	3	0	0	0	0	0	2	1	0	0	0.25	0
hsa-miR-645	0	0	0	0	0	0	0	0	0	0	0	0	0	0	0	0.111111	0	0
hsa-miR-374b-3p	339.225	255.549	308.622	5	9.25	0.333333	795.054	453.411	284.379	2.125	0	1	314.524	651.092	631.69	0	0	0
hsa-miR-17-5p	63823	40742.5	48468.6	1183.47	1402.42	215	165936	88134.3	64831.9	85.5	32.3333	151.833	61802	114191	100650	43.5	64	102
hsa-miR-4674	2	1	3	0	1	0	2	4	3	0	0	0	3	2	3	0	0	0
hsa-miR-448	0	0	0	0	0	0	1	0	0	0	0	0	0	0	0	0	0	0
hsa-miR-3200-5p	44	30.5	41.5	34	15.1667	0	179.833	109	69.2	1	1	1	43.5	60	80.5	0	3	0
hsa-miR-4730	1	1	0	0	0	0	1	3	2	0	0	0	0	3	1	0	0	0
hsa-miR-3681-5p	0	0	0	0	0	0	1	1	0	0	0	0	0	2	0	0	0	0
hsa-miR-548s	29	15	33.5	0	0	0	56.1667	27.8929	18	0	0	0	23	28	35.5	0	0	0
hsa-miR-302b-3p	0	0	0	0	1	0	1	2	0	0	0	0	1	0	0	0	0	0
hsa-miR-515-5p	19	15	15.6667	1	1	0	3	6	4	0	0	0	7	12	10	0	0	0
hsa-miR-92b-3p	8739.43	6928.08	7866.37	1495.05	2025.63	1374.08	11836.1	5673.48	4947.67	32	29.3333	116.333	7687.17	12120	11985.4	199.333	94.5	204.792
hsa-miR-3940-5p	15	14	10	0	2	0	48	22.5	9.08333	0	0	0	19.5	24.3333	25.75	0	0	2
hsa-miR-3140-5p	9	2	10	1	0	0	19.5	21.5	10	0	0	0	5	7	8.5	0	0	0
hsa-miR-3680-5p	21	6	7.66667	0	0	0	22.2857	13.6667	13	0	0	0	14	17.3333	12	0	0	0
hsa-miR-431-3p	0	0	0	0	0	0	0	0	0	0	0	0.0625	1	0	0	0	0	0
hsa-miR-103a-2-5p	27	18.1429	23.9167	0	1	0	56	38.4762	30.5	0	0	0	25.8333	50.5667	30	1	0	0
hsa-miR-6506-3p	0	0	0	0	0	0	0	0	0	0	0	0	0	0	0	0	0	0.142857
hsa-miR-3187-3p	343.317	257.892	222.233	159.917	297.383	63.3333	1139.26	479.242	427.283	7	2	25	266.15	395.733	421.611	19.5	15	18
hsa-miR-5089-3p	0	0	1	0	0	0	2	0	1	0	0	0	0	0	3	0	0	0
hsa-miR-3682-5p	5	1	4	0	0	0	7	0.333333	4	0	0	0	0.5	10.125	4	0	0	0
hsa-miR-3155a	4.16667	4.66667	6.5	1	0	3	2.27778	3.91667	4.89286	0	0	0	3	6.33333	11.25	0	0	0
hsa-miR-5089-5p	0	0	0	0	0	0	1	1	0	0	0	0	0	0	0	0	0	0
hsa-miR-5682	0	0	0	0	0	0	0.5	0	0	0	0	0	0	0	0	0	0	0
hsa-miR-4695-3p	1.33333	2	0.444444	0	0	0	1	2	5.16667	0	0	0	0	2	0.1	0	0	0
hsa-miR-3622a-3p	2	0	2	0	0	0	5.5	2.5	4	0	0	0	4	5	2	0	0	0
hsa-miR-6515-3p	34	10	18.75	3	1	0	47.7	27	26	3	0	4	20	32.3333	28	0	2	0
hsa-miR-1276	178.611	153.944	80.0444	14	13.5	17.3889	511.542	315.911	224.278	0	1	7	101.961	198	115.083	3	0	3
hsa-miR-520g	97.2	43.5	52.5714	6.2	6	0	30.1429	18	17.5	0	1	0	44.8333	95.5	64	0	1	0
hsa-miR-6499-3p	0	0.0555556	0	0	0	0	0.111111	0	0	0	0	0	0	0	0	0	0	0
hsa-miR-615-5p	3	5	3	0	1	0	41	19	19	0	0	0	3	12	5	0	0	0
hsa-miR-3120-3p	5	3	4	2	0	0	14.3333	22.0625	3	2	0	1	17	9.11111	2.5	0	0	0
hsa-miR-4769-5p	1	1	1	0	0	0	2	3	1	0	0	0	0	1	0.333333	0	0	0
hsa-miR-1306-5p	350.5	227.083	303.893	2	2	6	880.333	340.2	306	0	1	1	304.5	382.333	493.833	0	3	0
hsa-miR-519b-3p	2	0	1	0	0	0	2.33333	0	1	0	0	0	5.5	0	3	0	0	0
hsa-miR-3677-3p	39.4333	36.1	24.6667	2.5	1.5	0	69.2	33.95	16.6833	0.5	0	0	24.7	48.1667	27.6364	0	0	0
hsa-miR-513b	0	0	0	0	0	0	1	1.5	3.5	0	0	0	1	0	0	0	0	0
hsa-miR-4641	0	1	5	0	0	0	4	4	2	0	0	0	4	1	3	0	0	0
hsa-miR-23a-3p	13221.2	9653.74	11724.6	7852.58	4107.84	452.643	34730.1	17974	13195.6	197.282	48.0352	156.773	15471	23399.1	24680.3	88.5	117.75	274.568
hsa-miR-4520b-3p	0	0	1	0	0	0	0.333333	0.5	0.833333	0	0	0	1	3.33333	0.5	0	0	0
hsa-miR-675-3p	165.833	149	83.3333	43	64.3333	3	247	127.5	99.5	0	0	0	111	189.5	140.167	1	6	3
hsa-miR-1269a	0	0	1	0	2	0	1	0	0	0	0	0	0	0	0	0	0	0
hsa-miR-2110	523.5	517.833	432	73.3333	167.5	123.333	1295.17	742	489.591	8	9	27.1667	542.5	855.333	894.583	39	19	36.1667
hsa-miR-1237-5p	0	1	0	1	0	0	0	0	0	0.0526316	0	0	0	0	0	0	0	0
hsa-miR-483-3p	27.8333	22.6667	21	0.5	2.5	0	98.9444	47.4103	52.4167	0	0	0	19.4167	25.6667	43.6667	0	0	0.5
hsa-miR-4421	0.25	0.5	0	0	0	0	0.7	1.58333	0.5	0	0	0	0.5	0	0.5	0	0	0
hsa-miR-3195	0.0526316	0.0526316	0	1.2193	1.33333	0	0.2	0	0.2	1.5	0.7	0	0.0526316	0.419298	0.833333	0.2	0	0.355263
hsa-miR-4659a-3p	82	80	79	8.5	21.7	0	270.833	116.833	97.5	0	1	0	91	152.7	171	1	0	0
hsa-miR-193a-5p	373.583	362	278.25	43.4	70	34.5	1928.75	963.091	718.333	14	5	18	400.25	708.5	525.7	11	1	1
hsa-miR-146a-5p	192.75	104	135.583	584.573	236	45.8333	714.533	410.278	405.5	182.75	85.75	167.95	264.25	272.833	284.783	31.4167	27.5	24.5
hsa-miR-1289	0.4	2.66667	1.33333	0	0	0	0.4	2.8386	1.28889	0	0	0.8	4.66667	9.03333	4.4	0	0	0
hsa-miR-425-3p	4445.56	3033.18	3578	1181.17	963.5	211	11398.7	6466.37	4713.17	38	18	91	3776.33	7776.48	6874.07	57.3958	50	37
hsa-miR-2278	18	15	13	2	7	0	72	43.3333	17	1	0	0	8	18	23	0	0	0
hsa-miR-1179	0	0	1	0	0	0	3	3	3	0	0	0	3	1	4	0	0	0
hsa-miR-4474-3p	114.833	120.333	100.458	16.8333	23	1	275.689	147.375	105.167	2.16667	0	1	103.833	232.167	204.417	1	0	6.5
hsa-miR-5002-5p	1	1	1.5	0	0	0	1	0	0	0	0	0	2	0	0	0	0	0
hsa-let-7a-3p	18274.9	15578.2	14617	1493.25	1469.56	280.3	38009.6	22502.3	19782.8	102.333	77.2652	184.234	19731	37529	28847.8	155.75	53.25	81.7045
hsa-miR-380-5p	0	0	1	0	0	0	0	0	0	0	0	0	1	0	0	0	0	0
hsa-miR-4488	0.0909091	0.277778	0.266667	10.9652	27.111	11.7671	1	0.833333	0.0909091	5.58333	8.77424	6.51515	2	0.333333	1.33333	6.5469	10.9182	8.62121
hsa-miR-3691-5p	67	94.0909	62	18.3333	25	18.5	192	112	75.5	1	0	4	69	130	102	2	4	8
hsa-miR-19b-1-5p	88	42.5	45.5	2	0	0	119	76.5	48	0	0	0	53.9	157	74.5	0	0	0
hsa-miR-500a-5p	178	106.5	139.333	12.5	6	0	661.167	382	319.5	0.5	1	1.5	155	331.917	231.833	0	1.5	0
hsa-miR-3688-5p	20	37.6667	19.6667	16	3	0	50	35	15	0	0	1	21	48.2857	29.7333	1	0	4
hsa-miR-744-5p	13250.8	15907.3	8796.86	966.617	1788.76	393.5	29766.5	16109.8	11702	63.5	47	340	11968.9	18938.9	16497.4	276.833	197.167	356
hsa-miR-532-3p	461	246	499.25	17.3333	34	0	1724.57	714.65	624.556	3	1	2.33333	448.25	475.167	589.458	8	0	2
hsa-miR-4747-5p	1	2	1.25	0	2.11111	0	3	0	1	0	0	0	0	7	5.5	0	0	0
hsa-miR-26a-2-3p	151.5	143.825	91.25	6	3	0	277.083	204.5	125.2	0	0	1	140.667	278.958	227.458	0	0	0
hsa-miR-3605-3p	45	73	36.5	2	13.5	0	111	67	36	0	2	1	41	88	54.8333	3	2	1
hsa-miR-4677-3p	660.083	821.56	522.577	6.16667	18.5	4	1044.67	726.726	366.643	4	1	16	628.25	899.975	572.333	3	6	16
hsa-miR-34a-3p	11	10	9	1	1	0	28	13	14	0	0	0	7	27.25	20.25	0	0	0
hsa-miR-758-3p	0	0	0	0	0	0	2	4	0	0	0	0	2	0	2	0	0	0
hsa-miR-3122	4	1	3	1.33333	2	0	7	2	0	0	0	0	7	4	5	0	0	0
hsa-miR-3150b-3p	275.333	266.5	149	8	14	21	401	228.5	229.5	0	0	1	197	449.958	264.143	2	0.0625	1
hsa-miR-4797-3p	27.8333	30.5	16.119	0	2	0	51.6667	32.8333	16.6429	0	0	0	26.6667	44.0833	14.8333	0	0	0
hsa-miR-548ar-3p	143.833	109.033	80.5	3	0	0	392.486	228.182	163.733	0	0	0	114.083	314.4	187.871	0	0	0
hsa-miR-4690-3p	15.25	21	11	5	0	0	45.5	21	12	0	0	0	21	46.5	21.2	0	0	0
hsa-miR-202-5p	0.5	1	2	0	0	0	17.8333	3	2	0	0	0	1	6.16667	6.5	0	0	0
hsa-miR-4684-5p	45	37.6667	20	0	0	1	90.7	72.5	35.25	0	0.5	0	33.1429	49.75	30	0	0	0
hsa-miR-4638-5p	7	7	4	0	0	0	5	5	12	0	1	0	11.2	8.5	5	0	0.2	0
hsa-miR-378d	246.469	304.858	147.884	85.547	63.5042	6.6	610.947	421.037	268.027	3.33333	1.73333	13.034	228.364	415.622	233.567	3.68718	8.95801	22.6941
hsa-miR-6511a-5p	3.42857	10.8571	6.11429	3.92857	7.06349	6.85714	23.8571	12.5714	8	0	1.14286	0.571429	9.57143	21.7143	13.1429	3.42857	0.571429	5.71429
hsa-miR-101-5p	3.53333	2.38095	1.125	0	0	0	5.75	1.625	1	0	0	0	7.48333	9.20758	8.26786	0	0	0
hsa-miR-4650-3p	0	0	0	0	0	0	0	1	0	0	0	0	0	0	0	0	0	0
hsa-miR-4668-5p	0	0	0	0	1	0	0.111111	0	0	0	0	0	0	1.5	0	0	0	0
hsa-miR-4671-5p	0	0	0	1	1	0	1	0	0	0	0	0	0	1	0	0	0	0
hsa-miR-1248	28	23	39	3	12	0	143.5	96.75	68.2	1	0	9	56	96.6667	132.5	2	5	0
hsa-miR-5092	1	1	1	0	0	0	3	1	2	0	0	0	2	8	1	0	0	0
hsa-miR-4463	1	0	0	0	0	0	0	0	0.0526316	0	0	0.1	0.0769231	0	0	0	0	0
hsa-miR-135a-3p	0	3	0	0	2	0	2	2	0	0	0	0	0	1	1	0	0	0
hsa-miR-548b-5p	0.5	0	0	0	0	0	0	0	0	0	0	0	0.5	0	2	0	0	0
hsa-miR-4763-5p	1	0	0	0	0	0	3.5	4.5	1	0	0	0	0	2	0	0	0	0
hsa-miR-518e-5p	4.33333	3.66667	3.2	1.5	0.833333	0	1.66667	1.47619	1.30952	0	0	0	1	2.16667	2.30952	0	0	0
hsa-miR-1306-3p	174.25	143	115	1.05263	3.5	0.5	199.126	101.667	114.167	2	2	5	94.3333	238.125	136.7	1	0	0
hsa-miR-3917	4	2	3	0	0	0	10.25	1.33333	2.25	0	0	0	1	6.33333	2	0	0	0
hsa-miR-4793-3p	2	0	2	0	0	0	4.33333	3	6	0	0	0	2	6	0	0	1	0
hsa-miR-205-5p	4	4	6	3	2	8	26	3	7.5	0	0	0	9	22	21	0	2	0
hsa-miR-320c	413.089	243.506	424.688	2941.59	3138.23	2071.46	1062.4	654.217	547.221	532.148	344.581	1084.18	430.001	935.969	738.379	636.387	65.2249	134.918
hsa-miR-6515-5p	16.5	9	4	6	5	0	29.55	11	5.25397	0.25	0	0	16	26.4	11.5	0	0	0
hsa-miR-511	253.952	242.655	136.486	1.5	21.6667	32.9167	848.54	497.258	330.297	1	0	2	155.119	391.357	165.425	1	2	2
hsa-miR-661	0	0	0	0	0	0	0	0	0	0	0	0	0	2	0	0	0	0
hsa-miR-3162-3p	0	0	0	0	1	0	2	0.166667	0	0	0	0	0	0	1	0	0	0
hsa-miR-4722-5p	1	0	0	0	0	0	1	0.25	1	0	0	0	0	2	1	0	0	0
hsa-miR-4477a	0.5	1	0.5	0	0	0	0	0.5	0	0	0	0	0	0.5	0	0	0	0
hsa-miR-375	37036.5	42435.5	24731.9	2130.93	2439.29	3041	74858.1	43558.6	25137.1	159	119	502	34331	51421.3	33328	803.243	419.333	855
hsa-miR-424-3p	1408.83	926.583	946.883	16	70	17	1767.92	1024.33	846.833	1	0	3	1006.33	1858.64	1259.83	2	1	2
hsa-miR-499b-3p	634.95	537.833	427.905	5	12.5	2	2208.35	1341.56	776.31	1	3	2	701.158	1280.03	1049	0	5	2
hsa-miR-3618	1	0.1	0	0	0	0	0	0	1	0	0	0	0	0	0	0	0	0
hsa-miR-1277-5p	38.5955	36.1942	22.3477	0	0.166667	0	68.301	32.416	11.0556	0	0	0	36.1821	59.9989	47.9705	0	0	0
hsa-miR-513a-3p	0	0	0	0	0	0	1.14286	1.33333	0	0	0	0	0	0	1	0	0	0
hsa-miR-1238-5p	0	0.5	0	0	0	0	0	0	0	0	0	0	0	0	0	0	0	0
hsa-miR-4799-5p	7.5	8	8	0	0	0	22	17	8	0	0	0	3	16	8	0	0	0
hsa-miR-3074-5p	150019	114683	73991.9	15606.5	15232.1	9299.57	218983	110052	93970.5	723.633	353.25	1490.36	108669	265619	149505	408.433	324.667	568.5
hsa-miR-5196-5p	0	0	0	0	0	0	0	0	0	0	0	0	0	0.0909091	0	0	0	0
hsa-miR-4708-3p	51	49.75	54.4179	0.5	5.03333	0	171.772	80.8095	71.8333	0	0	0	52.9107	113.172	90.5114	1.2	0	0
hsa-miR-3173-5p	97.8333	41.8333	104.783	3	7.2	0	228.117	116.944	93.5	0	0	1	81.8333	110.833	156.833	0	0	0
hsa-miR-4748	0	3.25	1	0	0	0	4	3	7	0	0	0	0	2	4.16667	0	0	0
hsa-miR-4735-3p	1	0	0	0	0	0	1	0	0	0	0	0	0	0	0	0	0	0
hsa-miR-223-3p	1	0	0	3	15	0	0	0	0	1	2	0	0	1.33333	1	2	0	0
hsa-miR-4634	0	0	0.142857	3.33645	1.52051	29.5223	0	0	0	3.63571	1.31667	2.76667	0	0	0	3.46667	1.125	1.09167
hsa-miR-142-5p	442.556	310.944	284.683	77	62.6667	16.25	1446.86	796.5	534.376	8	9	8.5	465.617	1025.24	719.589	3	4	2
hsa-miR-664b-5p	9	3	4.5	2.2	1	0	14	15	7	0	0	1	7	10	7	0	0	4
hsa-miR-4525	0	1	0	2	1	0	3	0	0	0	1	0	0	1	0	0	0	0
hsa-miR-6511a-3p	61.6	37.6	61.4667	4.66667	4.8	0	131.727	67.2	36.5	0	0	0.8	62.8381	99.8667	93.2	2.4	0	0
hsa-miR-486-3p	5.2	9.25	8.47619	8.5	22.9444	28.6667	17.9167	10	6.11111	9	3.83333	8.22222	7.5	12.3333	11.5	32.3333	11.0833	21.9167
hsa-miR-507	0	0	0	0	0	0	0	0	1	0	0	0	0	0	0	0	0	0
hsa-miR-5583-5p	1	3	1	0	0	0	10	1	3	0	0	0	2	2	0	0	0	0
hsa-miR-449a	11.5	18	15.5	4.5	7.5	0	91	57.8333	35	0	0	0	22	47.5	41	0	0	0
hsa-miR-5001-5p	27	42	20.5	15.0625	31	16	101	65.25	42	0	0	10	31	43	29	6	0	6
hsa-miR-4765	3	3	3	1	0	0	13	7.14286	3	0	0	0	2	7.5	8	0	0	0
hsa-miR-3619-5p	97.5333	53.2	64.8167	3	4	0	188.095	89.45	79.6	0	0	1	54.8667	90.4333	122.429	1	0	0
hsa-miR-766-3p	56.1667	47.8333	47	34.5	42.1111	0	195.636	99.25	81.7576	1	0	7.22222	61.75	87.3333	76.5833	4.5	1	3
hsa-miR-3908	3	0	2	0	0	0	0	0	0	0	0	0	0	0	1	0	0	0
hsa-miR-4761-5p	8	5	6	0	0	0	18	9	5.16667	0	0	0	8	6	11.1667	0	0	0
hsa-miR-330-3p	6881.74	7207	4605.8	1686.19	1505.1	818.833	14248.6	10174.3	7604.58	83.5	67.5	256.5	5428.19	10881.8	7042.62	206.333	109	181.2
hsa-miR-186-3p	1	2	1	0	0	0.235294	1	3.66667	0	0	0	0	4	2	0	0	0	0
hsa-miR-92b-5p	347	317.75	384.583	21.1667	40.75	62	503.083	248	206	13	2	5.75	349	557.75	580.559	9	10	3
hsa-miR-10a-3p	50557.1	38500.6	41235.3	12438.4	10496.4	3429.82	125019	68956.2	55080.9	551.167	274.143	953.699	43936.2	98280.4	79412.1	420.643	313.833	465.786
hsa-miR-5699	76	45	44	0	2	0	213.476	111	103.167	1	0	0	82	173.5	103	0	0	0
hsa-miR-5584-5p	0	1	2	0	1	0	7	2	1	0	0	0	1	2	3.14286	0	0	0
hsa-miR-4710	1.5	1	0.5	0	0	0	1.4	2.2	3.4	0	0	1	1	2.2	1.2	0	0	0
hsa-miR-3202	1	3	2.66667	0	0	0	3.66667	1	1	0	1	0	1	3.66667	2	0	0	0
hsa-miR-200a-5p	95806.9	141168	48883.7	1406.4	1293.86	1418.67	163437	126848	60612.5	266	146.5	766.367	69734.6	158861	53162.5	564.111	632.667	1324
hsa-miR-943	38	39	34	3	0	0	79	70	31.5	0	0	0	33	61	37.25	2	0	0
hsa-miR-3910	1	0	0	0	0	0	0	0	0	0	0	0	0	2	0	0	0	0
hsa-miR-3149	9.16667	17.9103	20.8333	0	1	0	49.75	33.6111	17.5	1	0	2	15.3333	33	22.1583	0	0	1
hsa-let-7b-3p	696.619	1102.33	848.926	235.12	392.797	70.754	3209.76	1799.15	1738.54	30.7	18.2333	50.9	913.583	1516.87	1894.03	32.95	14	26.95
hsa-miR-146b-3p	50.3333	40	52.8958	2	5	0	92.8333	36.1667	31.1429	1	0.5	1.5	46.7	101.833	52.5	0.5	0	5
hsa-miR-885-5p	0	0.5	0	0	0	0	0.5	0	0	0	0	0	0	0	0	0	0	0
hsa-miR-1908	3	1	5	0	2	0	14	6.5	5	0	0	0	7	3	8	0	0	0
hsa-miR-3124-5p	12	6	5	0	4	11.25	23.5	10	18	0	0	1	8	12.75	13	0	0	0
hsa-miR-4731-5p	1	0	0	0	1	0	1	0	0	0	0	0	2	0	0	0	0	0
hsa-miR-4750-5p	12	7	13	1	0	0	20	13	16	0	0	3	15	17	22	0	0	0
hsa-miR-191-3p	660	570.867	480.875	38	83	27	1213.03	591.393	511.25	1	2	2	489.333	1252.75	938.694	11	3	6
hsa-let-7g-3p	114.333	78.3333	66.5	6	5.25	0	239	135.559	126.5	0	1	0	105	222.389	156.333	0	0	0
hsa-miR-551b-5p	3	2	3	0	0	0	10	2	1	0	0	0	5	6	3	0	0	0
hsa-miR-302a-5p	0	0	1	0	0	0	0	0	0	0	0	0	3	0	0	0	0	0
hsa-miR-769-5p	14781.5	21018.9	11273.4	961.576	889.713	198.892	28560.1	18375	11562	207	75	347.417	13982.5	22715.2	13317.3	204.333	184	480.475
hsa-miR-3186-3p	1	0	0	0.0555556	0	0	0	0	1	0	0	0	0	1	0	0	0	0
hsa-miR-20a-3p	116.333	82	128.333	0	0	0	297.383	193	118.833	0	0	2	139.583	275.667	259.448	0	0	0
hsa-miR-19a-3p	6880.35	4515.6	4911.23	38.2	24	37	14110.3	8346.47	4834.82	6	0	4.5	6568.11	9638.37	9853.37	3	1	0
hsa-miR-1915-3p	0	0	1	0	0	0	3	0.5	0	0	0	0	0	1	0	0	0	0
hsa-miR-544b	60.4167	52.0667	62.202	0.5	5	1	146.767	91.1167	50.8444	1	0	0	50.8333	124.083	90.7214	0	0	0
hsa-miR-603	0.333333	1	1	0	0	0	11.3333	2.33333	4.83333	0	0	0	4	2.33333	1.66667	0	0	0
hsa-miR-4505	0	0	0	0	0	0	0	0.0769231	0	0	0	0	0	0	0	0	0	0
hsa-miR-32-5p	14677.6	14684.6	10219.5	25	17	9	29409.4	15604.2	6548.23	3	0	4	16995.8	24000.4	20793	1	0	0
hsa-miR-5706	1.14286	2	0	0	0	0	6	2.5	1.33333	0	0	0	3.5	0.642857	3.5	0	0	0
hsa-miR-4694-5p	0	0	0	0	0	0	0	0	0	0	0	0	2	0	2	0	0	0
hsa-miR-3938	0	0	0	0	0	0	1	0	0	0	0	0	0	0	0	0	0	0
hsa-miR-3677-5p	33.0909	27.8929	17	0	0	0	43.45	28.75	21	0	0	0	16.2576	46.6667	42.5909	0	0	0
hsa-miR-371b-3p	1594.2	1263.63	1669.56	908.519	654.044	117.6	1320.01	638.493	504.2	16.5	7.1	32.5	1224.29	1855.2	1618.16	91.2	73.5	182
hsa-miR-938	0	0	0	0	0	0	0	0	0	0	0	0	0	1	0	0	0	0
hsa-miR-134	0	1	1	0	3	0	7.5	4.33333	2	0	1	0	0	2	3	1.5	0	1
hsa-miR-574-3p	1066.12	1013.65	835.714	363.584	298.665	138.125	3086.33	1635.51	1085.3	30.5833	16	57.119	1060.67	1648.82	1359.74	31.3333	22.3333	45.9167
hsa-miR-128	77205.1	72715.7	50476.2	5014.77	9282.88	6523.67	145384	95122.4	77815.2	621.022	300.167	1678.25	70386.3	148293	88532.4	978.722	434.167	927.167
hsa-miR-4751	0	0	1	0	0	0	1	0	0	0	0	0	1	2	0	0	0	0
hsa-miR-3074-3p	164.558	129.333	94.0417	2.33333	5.83333	0	373.5	161.625	145.25	2	2	1	136.625	279.7	157.867	0	0	0
hsa-miR-6716-3p	26	56	12	0	1	1	59.55	40.5	26.5	0	0	0	23	40.5	22	1	1	1
hsa-miR-342-3p	8	6	4	2	2	0	9	10	5	0	0	0	5	2	7	0	0	0
hsa-miR-23a-5p	66.5	128	65.4333	30.6667	62.6548	9	291.25	131.25	145	0	1	0	104.75	298.333	322.617	6	0	3
hsa-miR-584-5p	1939.89	2497.03	1466.56	426.367	571.9	140.26	3178.63	2035.44	1109.52	14.2262	21.2	40.9	1719.3	2989.11	1784.96	55.2833	60.75	115.083
hsa-miR-5587-5p	12	10.5	11	6.5	3	0	27.0588	20.8333	18.2	0	0	1	7	14	6	0	0	3
hsa-miR-298	0	0	0	0	0	0	1	0	0	0	0	0	0	0	0	0	0	0
hsa-miR-4479	14	27	20.3333	2	3	5.5	47.1667	19.5	20	0	0	0	12	34.1667	31	0	1	0
hsa-miR-4326	76.8125	60.6667	68.5833	8	5.08333	7	171.033	114.717	82.3929	0	0	3.33333	84	133.95	92.8958	1	0	4
hsa-let-7b-5p	224938	112752	181276	37020.6	39511.8	9279.4	428925	212429	162490	17948.3	14178.5	34040.4	217933	496843	307886	8708.59	1660.54	3117.19
hsa-miR-542-5p	32	16	23	1	0	0	40	20	23	0	0	0	23	33	22	0	0	0
hsa-miR-1231	0	0	0	0	0	0	0	0	0	0	0	0	0	0	1	0	0	0
hsa-miR-19b-3p	17088.2	9782.88	12085.8	285.067	133.333	196.667	35346.8	19492.1	13667.6	41	8	21.5	16530	24136.7	23948.3	3	6	6
hsa-miR-675-5p	263.501	206.922	172.89	36.304	64.4018	3	475.621	246.322	198.158	0	0	1	168.987	254.193	313.398	6.11111	2	3
hsa-miR-370	4	8	5	0	0	0	11	23.5833	8	1	1	0	10	13.2	9.33333	0	1	0
hsa-miR-199a-5p	22	16.5	23	2	1	0	86.6667	58	46	0	0	0	21	38.6667	26.6667	0	0	0
hsa-miR-5680	1	0	0	0	0	0	0	3	1	0	0	0	0	0	1	0	0	0
hsa-miR-4455	4.29841	1.7	1.90556	0	0	0	8.26667	6.8	5.575	0	0	0	3.63611	9.89167	11.8345	0	0	0
hsa-miR-30a-5p	1987.07	1985.49	1693.46	784.738	437.535	56.5	5592.31	3955.93	2099.5	30.5	33	86	2122.51	3238.15	2055.79	27	56	129
hsa-miR-3682-3p	12.5	12.5	9.5	0.333333	3	9	24	15	8.5	1	0	0	5	11	7.5	0	0	0
hsa-miR-3189-3p	49	38.5	44	9.5	16	0	150.558	74	39.25	0	0	3	35.5	55.3667	58.3333	1	0	0
hsa-miR-1287	835.81	709.786	650.429	185.976	117.6	21	3349.32	1818.57	1365.83	4	2	13.1429	735.143	1664.74	1264.27	3	8	7
hsa-miR-6718-5p	0	0	0	0	0	0	1	0	0	0	0	0	0	0	0	0	0	0
hsa-miR-657	0	0	1	0	0	0	2	0	0	0	0.1	0.05	2	0	3	0.142857	0	0
hsa-miR-4689	17.9583	4.625	9	6.25	13.375	0	26.7679	15.75	9.625	2	2.125	0.125	6.83333	23.5	22.7917	0	0	0
hsa-miR-939-3p	1.14286	0	1	2	0	0	3.13333	0.255556	1	0	0	0	1	2.23333	0.0769231	0	0	0
hsa-miR-136-3p	3	4.33333	6	0	0.5	0	7.83333	13	3	0	0	0	9.33333	11	9	0	0	0
hsa-miR-519a-3p	11.6667	11	16	0	0	0	13	4	3	0	0	0	5	20.6667	8	0	0	0
hsa-miR-339-3p	1895.62	1567.27	1326.87	463	358.417	231.5	3733.42	2031	1525.1	52	26.1667	105	1815.83	3526.42	2617.43	44	6	40
hsa-miR-5003-3p	1	2	1	0	0	0	6.5	2	2	0	0	0	1	4	2	0	0	0
hsa-miR-651	1559.33	1291.72	1337.83	32	23	14	4462.07	2625.93	1302.46	4.33333	4	10	1944.79	2200.78	1724.23	5	0	13
hsa-miR-1252	2	3	1	0	0	0	3.5	3.33333	2	0	0	0	2	0	2	0	0	0
hsa-miR-4739	0	0	0	0	0	0	0	0	4	0	0	0	0	0	0	0	0	0
hsa-miR-580	75.5833	82	40	0	3	0	154	107	35	0	0	0	64	106	52	0	0	0
hsa-miR-1246	173.428	183.383	183.065	476.488	867.4	1810.29	610.951	372.765	196.858	481.674	318.638	1530.35	191.576	384.929	248.539	130.238	338.088	637.687
hsa-miR-3135b	0	0	0	0	0	0	0.0666667	0	0	0	0	0	0	0	0	0	0	0
hsa-miR-600	0	2	1	1	0	0	6	1	2	0	0	0	2	4	1	0	0	0
hsa-miR-576-5p	1816.9	1998.99	1323.33	82.0714	108.797	53.6667	4368.97	2594.94	2019.74	5.5	0	7.33333	1999.11	4388	2335.96	6.83333	8	6.2
hsa-miR-129-1-3p	0	0.166667	0.5	1	0	0	3.5	1.25	2.5	0	0	0	3.5	5	4	0	0	0
hsa-miR-371a-3p	1067	739.333	749	46	60	88.5	644	362.25	346.5	0	0	0	653.5	1755.75	922.833	7	4	10
hsa-miR-586	3	3	2	0	1	0	18	7	4	0	0	0	3	7	6	0	0	0
hsa-miR-876-5p	0	0	0	0	0	0	0	0	0	0	0	0	1	1	0	0	0	0
hsa-miR-3145-5p	26	27.5	27.5	2	1	0	144.5	54.8333	51	0	0	0	39.8333	56.5	39.5	0	0	0
hsa-miR-4664-5p	5	2	1	2	0	0	2	2	0	0	0	0	2	2	7	0	0	0
hsa-miR-4436b-3p	1	2.25	0	4	5.16667	4.25	0.1	1	2.5	0	0	0	2	2.83333	3	0	0	0
hsa-miR-3150a-5p	334.333	335.5	189	9	19	34	490	264.5	277.5	0	0	1	259	578.958	326.143	2	0.0625	2
hsa-miR-3692-3p	6	4	5	0	0	0	5	3	5	0	0	0	9	6.5	4	0	0	0
hsa-miR-582-5p	416.45	284	338.533	7.5	3	0	1816.73	1049.6	761.7	0.5	0	1	474.7	828.7	833.543	0	0	0
hsa-miR-338-5p	37	38.25	42	6	13	5	3.2	6	0	0	0	0	21	49	42.3333	3	0	0
hsa-miR-1296	996.298	628.367	632.083	125.317	194.5	53.1111	2172.31	1039.19	1122.77	7.25	4.5	38	778.819	1070.67	1444.77	27.8333	3.75	16
hsa-miR-543	0	3	2	0	0	0	4	7	4	0	0	0	3.5	5	2	0	0	0
hsa-miR-4419b	0	0.111111	0	0	0	0	0	0	0	0	0	0	0.5	0	0.5	0	0	0
hsa-miR-4291	0	0	0	0	0	0	0	0	0	0	0	0	0	0	0.1	0	0	0
hsa-miR-766-5p	11	12	8.5	7.5	18	14.5	38.5	10	22	2.16667	0	0	5	21	19	0.5	1	2
hsa-miR-151b	10.3355	9.59454	4.34771	66.3735	21.9924	2.38889	19.6159	14.1029	8.3146	1.20327	0.617647	1.09711	7.96441	21.2703	12.4158	0	0.392157	3.54613
hsa-miR-1271-3p	0	0	0	0	0	0	0	0	0.05	0	0	0	0.05	0	0	0	0	0
hsa-miR-200c-3p	179507	158792	131483	15288.8	48648.3	11252.5	405298	196473	157721	2003	1702	7627.67	173622	323925	243842	4573.83	2126	4623.2
hsa-miR-301b	634.5	384.5	358	39.3333	8	1	1300.83	723.083	477.25	0	2	0	572.833	1333.33	887	3	1	1
hsa-miR-96-5p	34376.1	22757.7	23755.3	130.333	191	27.8333	61731.4	36384.3	23318.5	11	3	20	29447.3	76433.2	48106.7	2	3	4
hsa-miR-3689a-5p	0	0	0	0	0.333333	1.66667	0.333333	0	0.333333	0	0	0	0	0	0.333333	0	0	0
hsa-miR-6504-3p	0	0.5	0	0	0	0	0	0	0	0	0	0	0	0	0	0	0	0
hsa-miR-1228-3p	3.5	3	8	2	0.2	0	23	7.5	5	0	1	0	2	4	7	0	0	0
hsa-miR-549a	660.933	738.204	547	95.9167	56.5	77	1681.39	1135.49	781.438	39.1667	19.5	74.5	597.778	1209.9	684.917	11	12	4.5
hsa-miR-4721	2	2.33333	1	0	3	0	7	7	6.5	1	0	0	1	5	8	1	0	2
hsa-miR-491-5p	94	69	73	0	2	0	269	137.5	105	0	0	0	87	110	162	0	0	1
hsa-miR-548al	11.6667	11	4	0	0	0	22	15.0909	10.5	2	0	0	9	19.3333	11	0	0	0
hsa-miR-4685-3p	13.1167	5.7	10	1	0	0	25.75	7.75	5.5	0	0	1	7.1	18.5	13.25	1	0	0
hsa-miR-4744	2	3	4	0	0	0	10	11	2	0	0	0	15	8	3	0	0	0
hsa-miR-3925-3p	1	3	2	0	1	0	20	1.5	5	0	0	1	0	10	3.5	0	0	0
hsa-miR-4286	4.73333	1.91667	4.3631	0	0.25	0	12.4334	6.93333	7.78333	0	0	0	3.5	8.11667	6.27361	0	0	0
hsa-miR-17-3p	1229.71	1137.45	835.7	29.8333	12.3333	0	2642.86	1664.31	1035.31	0	0	4	1217.4	2461.91	1949.52	0	1	0
hsa-miR-5585-5p	2	0	0	0	0	0	1	3	0	0	0	0	0	2	0	0	0	0
hsa-miR-644a	0	0	0	0	0	0	0	0	0.0625	0	0	0	0	0	0	0	0	0
hsa-miR-124-5p	1	5	2	0	0	0	6	2	5.75	0	0	0	6	12	9	0	0	0
hsa-miR-4449	0	1	0	2.14286	4.5	0	1	1	1	0	0	2	1	4	0	0	0	1
hsa-miR-410	0	0.5	1	0	0	0	0	4	1	0	0	0	0.5	1.5	1	0	0	0
hsa-miR-196b-3p	43.5	26	47	2	0	0	128	90.5	32.5	0	0	0	53	57	82.85	0	0	0
hsa-miR-3200-3p	1216.64	944.5	1139.5	180	145.1	0	4107	2280.5	1652	3	2	15.0588	1165	1892	1840.5	5	7	11
hsa-miR-196a-3p	81	94	48	1	0	0	42.2	44	17	0	0	0	60.5	81.3333	64	0	0	0
hsa-miR-641	2004.7	1269.83	1413	92	72.5833	28	2578.91	1417.74	1119	3	3	3	1669.64	4073.83	2270.5	2	9	4
hsa-miR-320e	11.1677	7.05952	6.3467	106.535	140.024	42.4774	36.0045	17.7769	8.54028	11.69	7.72329	23.9444	10.6265	24.1383	13.6001	12.7527	1.56944	2.66239
hsa-miR-4804-3p	5.14286	6.5	10	2	0	2	21	5	8	0	0	0	16.5	11	17.125	0	0	0
hsa-miR-1285-3p	53.1364	46.6835	42.8009	0.722222	1.60556	0	114.244	77.5525	45.9135	0.111111	0	0.222222	53.847	118.174	75.4684	0.111111	0	0
hsa-miR-3153	0	1	0	0	0	0	0	0	0	0	0	0	0	0	0	0	0	0
hsa-miR-30a-3p	108.47	117.25	71.0833	62.6667	34	0	352.583	198.528	92.6111	5.0625	6	13	85.0833	160.405	110.951	8.33333	9	34
hsa-miR-548d-3p	13.9167	11.8333	18.1905	0.333333	1	0	45.9628	17.8234	17.7619	0	0	0	16.6175	29.3071	42.5249	0	0	0
hsa-miR-5006-5p	0	0	0	2	1	0	0	0	1	0	0	0	1	0	0	0	0	0
hsa-miR-525-5p	3	6	12	1	1	0	1	1	1	0	0	0	1	14.125	4	0	0	0
hsa-miR-494	0	0	0	0	0	0	2	1	0	0	0	0	1.5	0	0	0	0	0
hsa-miR-548az-5p	16.9028	19.4083	31.3667	0.944444	2.5	4	89.8409	64.7381	37.5611	0.0555556	0	1.5	23.5556	47.9444	31.3929	0.0555556	1	0.111111
hsa-miR-4717-5p	4.5	6.33333	2.74286	0	0.666667	0	14.8111	6.07143	7	0	0	0	7.5	8.33333	8.58333	0	0	0
hsa-miR-4690-5p	4.06667	3	2	1	0	0	2.58333	1	1	0	0	0	2	1	0.5	0	0	0.166667
hsa-miR-1343	55	43	37	3	6	0	161.167	61	77	1	2	2	74.25	83.3333	82	7	3	3
hsa-miR-3678-3p	7.5	6	1.5	0	0	0	14.5	11.5	3	0	0	0	4.5	9.5	2.5	0	0	0
hsa-miR-3591-3p	17.6667	23	15.5	15	44.8333	42.5714	79.9762	61.0952	37.3333	15.4286	22	37.5	17.5	53	29	19.5	13.25	19.5
hsa-miR-20b-5p	718.955	214.017	360.317	4.33333	2.58333	1.66667	1137.58	412.677	408.706	0	0.333333	0.5	576.2	911.133	710.7	0	0	0.5
hsa-miR-4725-3p	1	0	0	0	1	0	6.33333	4	4	0	0	0	0	1	0	0	0	0
hsa-miR-4706	2	6.07143	7.5	1	0	0	14	7	4	1	0	0	3	5	3	0	0	0
hsa-miR-1260a	307.064	230.301	242.627	5.97059	5.20588	3.82353	889.964	370.082	282.783	1.52941	0.352941	0.352941	323.706	488.761	485.797	0.705882	0.460784	1.80392
hsa-miR-5692c	0	0	0	0	0	0	0	0	0	0	0	0	1	0	0	0	0	0
hsa-miR-3591-5p	0	0	0	1	1	0	1	0	5	0	0	0	0	0	0	0	0	0
hsa-miR-503-3p	9	5	3	0	1	0	10	6	1	0	0	0	4	15	6	0	0	0
hsa-miR-1307-3p	38343.7	33425.8	23650.3	1124.44	2862.14	2573.61	78860.7	40626.6	41233.9	116	119	346	35003.3	50385.2	47799	712.111	200	317
hsa-miR-92a-1-5p	776	749	786.5	22	58	26	1571	773	603.5	4	0	3	950	2055	2025.57	15	2	6
hsa-miR-376a-3p	1	0	0	0	0	0	0.666667	1	1	0	0	0	0	0	1	0	0	0
hsa-miR-5000-5p	2	8	6	0	0	0	16	7.5	10	0	0	0	6	19	10	0	0	0
hsa-miR-3065-5p	240.333	149.5	188.278	54	78	10	523	300	270	2	0	2	243	521.917	512.111	0	0	1
hsa-miR-4457	2.5	0	0	2	0	0	9	14.5	3.5	0	0	0	2	3	6	0	0	0
hsa-miR-1	31	33.1667	28.6667	7.66667	9.125	28.6667	580.483	299.644	158.792	3	4.33333	12.3333	22.3333	65.5667	27.6667	5	11.6667	5
hsa-miR-125b-2-3p	1	3	0	0	0	0	3.5	6	1.5	0	0	0	5	4.5	3	0	0	0
hsa-miR-3680-3p	4.66667	1.33333	1	0	0.833333	0	2	0.666667	2	0	0	0	0.666667	6.83333	2	0	0	0
hsa-miR-548am-5p	0	0	0	0	0	0	0	0	0	0	0	0	0	0	0.05	0	0	0
hsa-miR-874	75.5	61	37	1	4	0	55	29	21	0	0	2	91.5	131.5	135.333	0	1	2
hsa-miR-2392	0.05	0.515152	0	0	0	0	0.533333	0	0	0	0	0	0.0588235	0	0.25	0	0	0
hsa-miR-323b-3p	0	0	0	0	2	0	0	2	0	0	0	0	0	0	0	0	0.125	0.0625
hsa-miR-4784	1	2	0	0	1	3	5	1	1	0	0	0	1	1	3	0	0	0
hsa-miR-1273c	20.3286	18.6524	20.081	4.64444	6.76667	0	61.0755	29.6683	33.7806	0.952381	0	0.666667	17.8345	33.776	27.6786	0	0	0
hsa-miR-5690	5	7	1	0	0	0	12	9	6	0	0	0	6	5	5	0	0	0
hsa-miR-4489	1	0	0	1	3	0	3	0	0	1	0	0	0	0	3	0	0	0
hsa-miR-4431	2	0	0	0	0	0	0	0	0	0	0	0	0	1	0	0	0	0
hsa-miR-378f	10.89	17.295	10.3318	1.12821	3.3342	0.285714	38.2549	25.9059	17.1088	0	0	1	12.8981	30.3425	17.6359	0	0	0.2
hsa-miR-183-3p	283.111	218.5	198.444	36	32.3472	9	761.5	417	310.833	0	0	0	278.5	447.667	414.033	0	0	0
hsa-miR-194-3p	177.886	190.611	191.333	7	25.7778	0	859.778	475.833	348.583	7	2	3	193.833	296.056	289.833	6	5	6.5
hsa-miR-548f	0	0	1	0	0	0	1.08333	1.4	1.08333	0	0	0	0.2	1.06765	0.142157	0	0	0
hsa-miR-2276	112	87.5	69.5833	4	6	9	211	116.5	113.667	0	0	4	115.833	182	99.8333	1	2	1
hsa-miR-223-5p	0	0	0	0	6	0	0	0	1	0	0	3	0	0	3	1	0	1
hsa-miR-4640-3p	4	2	1.33333	0	2	0	9	2	2.33333	0	0	3	3	0	1	0	0	0
hsa-miR-106b-5p	15402.2	10660.7	11454.6	260.645	121.262	24.625	32480.7	19537.6	11043.5	24.8095	3	5.92857	13478.3	25682.8	25567.8	6.11905	2.14286	5
hsa-miR-4680-5p	1	1	2	0	2	0	3	4	1	0	0	0	0	8	4	0	0	0
hsa-miR-147b	1405.62	1499.34	789.881	30.8333	12	16.25	4120.09	2706.5	1391.66	17.5	3	20.5	1074.41	2515.13	1188.85	4	5.5	22
hsa-miR-1914-3p	2	2	1	5	0	4.5	9	1	3	0	0	1	0	4	4	0	0	0
hsa-miR-518b	38.8333	27.3333	27	2	5	0	8.14286	6	1	0	0	0	13	30.5	16	1	1	1
hsa-miR-379-5p	1	4	3	0	2	0	13	6	6	3	1	0	8	9.5	8	0	0	0
hsa-miR-3676-5p	1.72778	1.44444	1.29206	0.642857	0.448413	0	5.54355	5.53333	1.67679	0.0769231	0	0.353175	1.48492	3.13472	2.99399	0.214286	0	0.0714286
hsa-miR-4678	0	0	0	0	0	0	0	0	0	0	0	0	0	0	0.0769231	0	0	0
hsa-miR-3126-5p	0	0	0	0	0	0	0	1	0	0	0	0	0	0	0	0	0	0
hsa-miR-4758-5p	1	1	3	4	7	5	16.5	5	6.33333	0	0	2	1	1	4	6	0	0
hsa-miR-26b-5p	21202.2	16087.9	21953.7	3491.91	2700.53	135.292	73659.7	33513.3	21483.3	191.833	52	315.939	22208	43364.1	46525.8	34.3333	41.3333	121.583
hsa-miR-149-3p	14.5	12	8	0	4	0.2	27	11	9	1	0	0	8.33333	23.3333	16	1	0	0
hsa-miR-1255b-5p	0	0	0.153846	0	0	0	0.117647	0.133333	0	0	0	0	0	0	0	0	0	0
hsa-miR-5708	0	0	0	0	0	0	0	1	0.111111	0	0	0	0	0.1	0.333333	0	0	0
hsa-miR-6715a-3p	0	0	1	0	0	0	0	0	1	0	0	0	0	1	1	0	0	0
hsa-miR-573	144.5	179	86	0	0	0	193	121	49.3333	0	0	0	88	176.75	73	0	0	0
hsa-miR-1236-3p	10.5	8	7.14286	0.25	0	0	14.5	10	4	0	0	0	4.5	23	18.1429	0	0	0
hsa-miR-4680-3p	0	0	1	0	0	0	1	2	0	0	0	0	0	0	0	0	0	0
hsa-let-7g-5p	279852	236021	296829	20216.6	10982.9	2372.57	686737	360088	219082	3315.94	1211.43	3602.05	310010	563247	408514	726.688	1094.12	2075.94
hsa-miR-660-3p	15	17	10	0	4	0	94.5833	46	45	2	0	0	19	43.5	38.6667	0	0	0
hsa-miR-4731-3p	0	0	0	0	0	0	0	1	0	0	0	0	0	0	1	0	0	0
hsa-miR-4757-3p	2	1	0	2	0	0	2	0	0	0	0	0	0	0	0	0	0	0
hsa-miR-3655	0	0	0	0	0	0	0	0	1	0	0	0	0	0	0	0	0	0
hsa-miR-3160-5p	1.2	3	3.16667	1	0	0	7.4	7.41667	0	0	0	0	7.28571	5.66667	6	0	0	0
hsa-miR-765	7	7.75	5	1	1	0	12.5	9	4.5	1	0	0	1	7.2	1	0	0	0
hsa-miR-628-3p	50	37	28	66.1429	80	33.5	164	80.5	54	4	2	4	38.1429	84.5	43.5	5	3	4.5
hsa-miR-3687	214.857	149.5	148.5	11	1	0	168.193	99.9	100.325	1	2	3	153.593	336.38	271.583	0	0	5
hsa-miR-4511	19	13.3333	9	1	0	8	32.5	17.75	8	0	0	0	14	23	11	0	0	1
hsa-miR-532-5p	18436.2	25108.2	14778.6	6127.75	3555.33	2133.67	55606.9	46012.6	24821.9	606.5	372	1274.64	19394.9	33797	20279.3	607	746.667	1302.48
hsa-miR-3131	12	5	6	0	4	0	55	24	16	2	2	0	11	19	13	1	0	5
hsa-miR-296-5p	1	0	1	0	0	0	5	7	9	0	0	0	1	1	2	0	0	0
hsa-miR-197-5p	9.16667	5	6.16667	10	13.5909	0	24.9167	8.16667	11	0	0	0	8.5	12.25	15.25	0	0	1
hsa-miR-378a-5p	1295.63	772.91	925.608	52.7	108	26.2	3677.97	1997.89	1831.76	2.16667	4	7	1021.77	2187.95	2002.8	6	4	6
hsa-miR-34b-3p	2	0	0	0	0	0	0	0	0	0	0	0	1	0	0	0	0	0
hsa-miR-519e-5p	0	0	0.333333	0	0	0	0	0	0	0	0	0	0	0	0	0	0	0
hsa-miR-6128	0	0	0	0	0	0	0.0526316	0	0	0	0	0	0	0	0	0	0	0
hsa-miR-20a-5p	162112	109447	141039	1408.17	1231.08	454.667	432692	213066	137153	131.143	49.3333	152	190351	254303	252614	46	42	93.5
hsa-miR-5586-5p	0	0	0	0	0	0	1	0	0	0	0	0	0	1	0	0	0	0
hsa-miR-6715b-3p	3	0	1	0	1	0	5	4	4	0	0	0	3	1	2	0	0	0
hsa-miR-106a-5p	4379.63	744.976	1882.03	40.6667	46.8333	25.3333	5680.55	1600.65	2060.05	1.5	0	0.833333	2970.36	5967.86	4210.41	0	0	0
hsa-miR-4714-5p	0	0	0	0	0	0	2	3	0	0	0	0	1	1	0	0	0	0
hsa-miR-188-3p	0	1	2	0	0	0	11.3333	8	4	0	0	0	6.33333	7	6	0	0	0
hsa-miR-4654	21	18	14.5	9	6	4	30.5	15	8	2	1	1	14	18	14	2	0	2
hsa-miR-21-3p	5492.64	4575.25	4687.89	604.56	275.5	23	14521.9	8269.33	5228.74	32	16	57	6272.83	9882.59	6933.32	10	14.125	46
hsa-miR-550b-2-5p	67.1667	32.869	41.8333	0	1.33333	0.666667	170.174	82.3611	84.0556	1.33333	0	0	63.6667	87.5	86.6857	0	0	0
hsa-miR-2355-3p	261.893	183	156.176	3.28571	10.3333	0	700.998	424.1	298	0	0	2	183.833	396.252	303.825	0	0	1
hsa-miR-148b-3p	48696.1	36969.2	42999.7	1918.6	1314.23	222.896	102221	56793.8	46238.5	488.033	177.05	560.73	45067.4	75576.3	53571	157.5	324.1	473.7
hsa-miR-590-3p	1739.32	1069.07	1414.84	32.5	22.1667	1	4231.36	2455.37	1078.73	0	0	0	1664.96	2946.11	2870.96	1	0	0
hsa-miR-5589-5p	0	0	0	0	0	0	0	1	0	0	0	0	0	0	0	0	0	0
hsa-miR-548u	369.263	399.69	292.686	0.1125	0.0625	0	516.597	303.016	107.589	0	0	0	398.165	561.461	352.915	0	0	0
hsa-miR-100-5p	36905.8	56089.4	26278.7	42345.2	45070	3414.5	54224.9	38509.6	18914.1	68.3333	79.8333	240.75	39858.1	59831.9	35997.4	2288.83	1186	3117.83
hsa-miR-5697	11	9	12	5	0	0	31	10	5	0	0	0	21	14	12	0.333333	0	0
hsa-miR-4682	4	7	2	0	0	0	20	7	10	0	0	0	2	11.75	8	1.5	0	0
hsa-miR-3692-5p	1	3	1	0	0	0	9	2	4.2	0	0	0	2	3	2	0	0	0
hsa-miR-4519	0	0	1	0	0	0	0	0	1	0	0	0	0	0	0	0	0	0
hsa-miR-548v	30.05	26.0909	32.8485	0	0	0	101.252	53.0833	22.6909	0	0	0	30.0457	32.4909	49.2603	0	0	0
hsa-miR-3661	47.5	52	31.5	4.5	3	31.5	64	41	22.5	0	1	5	42	65.5	47.5	1	3	4
hsa-miR-4791	67.9008	94.2254	48.5504	6.15873	0.650794	0	131.64	75.5346	28.094	8.03968	1.57143	4.5	92.9869	123.199	61.7103	1.43651	2.5	2.21429
hsa-miR-4638-3p	1	2	1	3	1	0	6	4	6	0	0	0	3	1	3	0	1	0
hsa-miR-214-5p	5	3	4	2	0	0	14.3333	22.0625	3	2	0	1	17	9.11111	2.5	0	0	0
hsa-miR-4666a-5p	0	1	0	0	0	0	0	0	0	0	0	0.0714286	0	0	0	0	0	0
hsa-miR-6500-3p	0	0	0	0	0	0	0.272727	0.167832	0	0	0	0	0	0	0.0714286	0	0	0
hsa-miR-301a-3p	303.333	219.7	189	5	8	0	675.5	369	199.5	0	0	0	293.896	469.483	490.476	0	0	0
hsa-miR-1291	21.7	27.7242	27.3333	131.606	74.7	12	58.4061	40.7667	27.6167	29.6909	19.8333	18.2909	23.6909	45.9409	37.6	4	23.3333	30.4242
hsa-miR-190b	208	115.5	156	40	28	1	2997.27	1491.78	886.667	10.2	6	43	197	317.25	270.167	2	0	4
hsa-miR-4673	0	1	0	0	0	0	2	0	3	0	0.05	0	0	0	0	0	0	0
hsa-miR-885-3p	0	0	0	0	0	0	0	0	0	0	0	0	0	1.5	0	0	0	0
hsa-miR-3199	5	8.15385	4	1	0	0	12	9	5	0	0	0	2	21	7	0	0	0
hsa-miR-4759	0	0	0	0	0	0	0	0	0	0	0.142857	0	0	0	0	0	0	0
hsa-miR-3912	144	109	85	8	2	5	208.5	91.6429	77.3333	4	0	2	156.2	283.167	162.333	0	0	0
hsa-miR-141-5p	11004.7	6146.56	5505	32.1667	26.5	19	16936.6	8912.38	7123.31	3	4	6	8167.97	21244.5	12709.1	6	0	1
hsa-miR-643	63.5	58.0625	34	11	7	0	107.643	65.5	72.75	0.25	0	0	58.2	99	97	0	0	0
hsa-miR-4484	5.59762	1.6746	2.14286	0.111111	0	0	5.3994	2.62619	1.70192	0	0	0.111111	2.42619	9.0736	4.34829	0	0	0
hsa-miR-4676-3p	25.5	21	36	1	1.06667	0	68.5	31	24.5	0	2	0	22.5	35.8333	32.5	0	0	0
hsa-miR-579	49	29	36	5	0	0	117	56	54	0	0	0	39	70	76	0	0	0
hsa-miR-520f	65	39.5	39.5	0.333333	0	0	27	12	4	0	0	0	12.5	38.5	25.8333	0	0	0
hsa-miR-361-5p	1229.11	1042.22	1065.88	897.569	700.447	102	4423.26	2230.87	1771.34	38.625	20.5	43.5	1323.02	2175.65	2452.16	16.5588	5	27
hsa-miR-4756-3p	0	0	0	0	0	0	0	0	0	0	0	0	0	1	1	0	0	0
hsa-miR-2277-3p	12	8	8	17	14.5	0	15	13	11	1	1	2	5	12	17	1	1	1
hsa-miR-3162-5p	1.33333	2	3	1	2.33333	9.25882	6.33333	3	5.33333	0	0	0	4.33333	7	3	0	0	0
hsa-miR-551b-3p	0	2	1	0	0	0	4.5	3	1	0	0	0	3	2	2	0	0	0
hsa-miR-4728-5p	0	4	0	0	0	0	2	3	0.75	0	0	0	1	2	8	0	0	0
hsa-miR-378i	797.288	547.962	1079.06	297.229	297.524	57.1384	1776.54	1261.68	1418.4	19.0403	7.61538	59.0823	721.425	1910.91	1278.87	16.9762	32.8195	46.0858
hsa-miR-23c	6.5	2.03333	11.5	1.5	0	0.166667	21.8333	16.6667	15.7436	0	0	0.5	3.5	7.95263	11.2	0	0	0
hsa-miR-4717-3p	4.5	5.83333	2.74286	0	0.666667	0	13.3111	5.57143	7	0	0	0	7	8.33333	8.58333	0	0	0
hsa-miR-520c-3p	10.3333	6.33333	8.66667	0	0.5	0	1	1	1.83333	0	0	0	3.5	8.5	7	0	0	0
hsa-miR-517c-3p	8	9	12	1	4	0	12	6	1	0	0	0	6	16.5	11.3333	0	0	0
hsa-miR-5591-5p	0	0	0	0	0	0	0.0555556	0	0	0	0	0	0	0	0	0	0	0
hsa-miR-6514-5p	19	43	27.5	10	11	5	51.5	34.2	12.0769	1	4	1	34.5	48	32.5	6	1	4
hsa-miR-3615	6165.15	6941.99	4222.96	262.153	584.325	650.5	12629.5	6700.48	6301.2	17	15	45.5	5340.5	10197.9	8007.13	266	156	260.333
hsa-miR-509-3p	3	0	1	0	0	0	85	17	27	3	2	2	4	2	0	0	0	0
hsa-miR-4508	1.29167	2.44167	0.934524	5.62692	11.4511	14.2513	4.40394	1.97619	0.60119	2.84524	0.898352	4.39286	1.85833	3.17619	4.00758	1.00952	0.125	2.42857
hsa-miR-4496	0	0	0	0	0	0	0	0	0	0	0	0	0	0	0.142857	0	0	0
hsa-miR-4764-3p	0	0	2	0	0	0	3	0	1	0	0	0	0	2	2	0	0	0
hsa-miR-4782-5p	3	2	2	0	0	0	19.5	17	5.25	0	0	0	6.2	7	2	0	0	0
hsa-miR-708-3p	0	1.25	1.66667	0	0	0	4.93254	2.61111	4.5	0	0	0	2.70168	2.125	1.05754	0	0	0
hsa-miR-1323	27	11	14.125	17	19	0	3.5	4	4	0	0	0	5	7	10	15	0	7
hsa-miR-4521	52.7	29.7	52.85	0	1	0	403.102	175.697	191.458	0	0	0	88.3121	150.33	188.953	0	0	0
hsa-let-7i-5p	476264	403298	431558	12011.2	10207	1280.98	745396	409100	220084	3328.8	1741.53	7705.54	413770	805905	436274	1264.5	1785.12	3566.99
hsa-miR-548ae	0	0	0	0	0	0	0.4	0	0.4	0	0	0	0	0	0.111111	0	0	0
hsa-miR-33a-5p	336.491	354.624	273.383	3	0	0	554.626	314.483	148.783	0	0	2	455.417	508.336	471.117	0	0	0
hsa-miR-384	0	2	2	0	0	0	0.642857	1	1	0	0	0	1.33333	2.5	3.25	0	0	0
hsa-miR-154-5p	1	0	0	0	0	0	2	1	0	0	0	0	0	0	0	0	0	0
hsa-miR-449b-3p	0	1	0	0	0	0	0	0	1	0	0	0	0	0	0.25	0	0	0
hsa-miR-3617-3p	0	0	1	0	1	0	7	5	3	0	0	0	2	0	0	0	0	0
hsa-miR-4699-3p	1	0	0	0	0	0	0	0	0	0	0	0	0	0	0	0	0	0
hsa-miR-4802-5p	26.5	16.5	26.5	0	1	0	102	61.5	41	0	0	0	14.5	37.8333	47.5	0	0	0
hsa-miR-1233-1-5p	0	0	0	0	0.0714286	0	0	0	0	0	0	0	0	0.142857	0.0714286	0	0	0
hsa-miR-4509	0	0	0	0	0	0	2	0	0	0	0	0	0	0	0	0	0	0
hsa-miR-6090	0	0	0	0	0	0	0	0	0	0	0	0	0	0.0526316	0	0	0	0
hsa-miR-1226-3p	277.75	243.5	306.367	3	3	0	1107.19	532.583	445.083	0	0	1	254.258	431.5	424.833	0	0	0
hsa-miR-127-3p	2	37	32.3333	2	22.1429	4	46	67.6111	34.5	0	0	0	36.4048	45.8333	42.5	1	0	2
hsa-miR-2681-5p	0	0	0	0	0	0	0	0	0	0	0	0	1	0	0	0	0	0
hsa-miR-654-3p	0	1	0	0	0	0	5.5	2.5	0	0	0	0	1	1	1	0	0	0
hsa-miR-5004-3p	0	3	1	2	4	0	5.2	1	0	0	0	0	1	2	2	0	0	0
hsa-miR-23b-3p	6086.77	4439.03	5369.73	463.159	348.477	20.9167	22740.6	11667	8019.13	97.6374	15.5352	87.1061	5918.37	9758.32	8797.91	14.5	11.25	33.5682
hsa-miR-3613-5p	2877.8	1976.22	1960.79	93.6894	102.333	6	4647.62	2162.13	1499.03	3	1	12	2510.29	4015.58	3542.98	3	0	1
hsa-miR-4679	2	0	3	0	0	0	15.5	4	6	0	0	0	2	2	1	0	0	0
hsa-miR-429	161666	122037	119776	9653.42	5106.52	1228.03	380434	218219	147418	273	115	423.5	135868	277955	207146	222.5	144	256
hsa-miR-584-3p	7	2	8	2	1	0	9.5	6	6	0	0	0	7.5	5	10	0	0	0
hsa-miR-3614-5p	6	6	2	0	0	0	10	11	2	0.283333	0	3	7	19.125	5	0	0	1
hsa-miR-4655-5p	0	0	0	0	0	0	7	4.83333	1	0	0	0	0	2	1	0	0	0
hsa-miR-508-3p	3	10	4	0	0	0	170	98	38.8333	0	0	0	9	12	4	0	0	0
hsa-miR-4762-5p	4.5	0.5	6.14286	0	0	0	14.75	3.5	7.5	0	0	0	0.5	13	3	0	0	0
hsa-miR-200b-5p	3142.82	3625.39	2287.4	227.35	552.4	312.5	7707.47	4438.6	3077.19	22.2	29.125	110.5	2705.54	5320.86	3582.62	135.2	42.4333	125
hsa-miR-500b	0	0.5	0	0	0	0	0	0.5	0	0	0	0	0	0	0	0	0	0
hsa-miR-98-3p	84.7068	88.3611	98.6604	71.2	42	0	398.138	296.815	195.015	3	2	6	100.383	213.79	249.45	9	0	1
hsa-miR-548d-5p	0.1	0	0.1	0	0	0	0.05	0	0	0	0	0	0	0	0	0	0	0
hsa-miR-3157-3p	16	27	14	2	0	0	51	31	35.5	0	0	0	15	38	18.5	0	0	0
hsa-miR-324-5p	452.125	346.071	335	90	50	0	1236	750.833	457	3	0.5	2	411.25	717.393	721.921	0	2	2
hsa-miR-26a-1-3p	135.5	105.5	116	3	4	0	376.5	198.5	113.5	0	0	0	108	214	228.5	0	0	0
hsa-miR-1294	17.5	30	24.5	4	5.5	0	98.5833	60.0333	37.25	0	0	4	45	47.5	47	1	0	1
hsa-miR-6501-5p	27.5	15	9	0	5	0	38	34	15	0	0	0	18	37.5	17.8333	0	0	0
hsa-miR-4433-5p	0	0	0	0	0	0	3	1	0	0	0	0	0	0	0	0	0	0
hsa-miR-5696	5	7	6.5	0	0	0	11	13	6	0	0	0	7	5	7.83333	0	0	0
hsa-miR-3157-5p	13.25	12	10	0	0	0	46.25	25	24	0	0	0	8	28	19	0	0	0
hsa-miR-122-3p	0	0	0	0	0	0	1	0	5	0	0	0	0	0	0	0	0	0
hsa-miR-4774-3p	0	0	0	0	0	0.0666667	0	0	1	0	0	0	0	1	0	0	0	0
hsa-miR-154-3p	0	1	1	0	0	0	0	0	1	0	0	0	0	0	0	0	0	0
hsa-miR-210	4459.71	3142.83	3148.5	252.667	259.083	36	9714.3	5210.37	4447	19	5	31	3389.83	4475.58	5698.48	5	3	8
hsa-miR-769-3p	423.5	222.2	347.667	27.825	41.1667	0	1055.14	690.367	510.333	3	5	4.2	378.333	701.5	772.56	1	0	0
hsa-miR-3168	17.4762	4.46667	8	14.0889	23.3778	81.2909	27.7333	13.4	27.3	17.0095	57.1762	48.9333	12.6333	20.0667	24.1333	36.7	73.5	21.0762
hsa-miR-4520b-5p	0	1	0.5	0	0	0	0	0	0.333333	0	0	0	0	2.33333	1.5	0	0	0
hsa-miR-143-3p	101.083	338.083	165.011	23.25	37	7	524.106	535.332	148.833	6	3	17.5	184.9	424.199	313.572	8	4	14
hsa-miR-4750-3p	0	0	0	0	0	0	0	0	1	0	0	0	0	0	0	0	0	0
hsa-miR-4665-5p	9	15	5	5	3	0	30.125	19.125	11	1	0	2	7	11	12	3	0	1
hsa-miR-4677-5p	92	68.5	54.5	8	1	0	151.208	81.5	66.6667	0	0	0	63.8333	159.417	93.6667	0	0	0
hsa-miR-10b-5p	32468.3	49217.6	26770.7	1942.13	1340.1	7145.21	123542	90899.3	46528.1	3366.05	2191.42	4397.98	44588.2	70560.9	45337.3	1440.35	1153.42	2398.82
hsa-miR-148b-5p	922.905	968.952	637.833	249	78	7	1911.61	1344	804.95	5	6	6	783.75	1882.59	1142.83	7	6	10
hsa-miR-3129-5p	1	0	1	0	0	0	4	1	0	0	0	2	0	2	2	0	0	0
hsa-miR-512-3p	137	125	109	24	24	0	50	24	17	0	0	0	51	157.333	103.667	0	1	1
hsa-miR-4454	0	0	0	0	0	0	0.2	0.166667	0.166667	0	0	0	0.166667	0.142857	1	0	0	0
hsa-miR-5197-5p	0	0	0	0	0	0	1	0	0	0	0	0	0	0	0	0	0	0
hsa-miR-423-3p	65507.7	52484.8	66656.3	13253.3	18197.6	34233.3	178815	88823.3	78715.8	2804.37	1859.31	5131.58	68000.8	95999.9	98336.1	2803.67	849.45	1249.39
hsa-miR-487b	1	3	1	0	0	0	5	7	2	0	0	0	2	1.5	3	0	0	0
hsa-miR-1910	8.5	9	11	1	18.619	0	41.5	14	18.5	0	0	0	7.5	13.5	9.08333	1	0	0
hsa-miR-331-5p	894.208	481.25	535.367	179.667	195.976	34	1735.45	899.228	748	11	7	18	635.125	1326.5	1007.26	11	6	4
hsa-miR-610	12.5	14	10.5	3	0	4.5	21.8333	9.5	7.5	0	0.5	0	10.5	23.5	11.5	1	0	0
hsa-miR-519d	70.3333	23	39.5	4	4.5	8	13	13	15	0	0	0	20	47	36.25	2	0	0
hsa-miR-31-5p	2632.07	1852.12	2284.13	16.5	30.0625	6	13509	7241.95	4955.95	0.0625	0	7	3007.16	5191.32	6879.7	2	0	12
hsa-miR-3924	1	0	0	0	0	0	0	0	0	0	0	0	1	6	2	0	0	0
hsa-miR-181d	525.333	292.958	443.25	45.5	29	3	1243.17	737.333	553.167	9	3	5	505.917	1024.22	611.083	2	0	2
hsa-miR-504	1	0.333333	0	0	0	0	1	0	0	0	0	0	0	0.125	0	0	0	0
hsa-miR-935	23	15	20	61	62	0	8	3	5	0	0	1	15	27	30.3333	0	1	3
hsa-miR-612	1	0	1	0	1	0	2	0	1	0	0	0	0	2	1	0	0	0
hsa-miR-518f-3p	0	1.33333	0	0	0	0	0	0.5	0	0	0	0	0	0	0	0	0	0
hsa-miR-762	0	0	0	0	2	0	1	0	0	0	0	0	0	0	0	0	0	0
hsa-miR-150-3p	0	0	0	0	0	0	5.64286	3	3	0	0	0	0	0	2	0	0	0
hsa-miR-548aq-5p	1.83333	1.33333	1.91667	0	0	0	4.16667	2.33333	0.416667	0	0	0	1.5	5.98333	1.23333	0	0	0
hsa-miR-4999-3p	1	1	1	0	0	0	11.8333	2.25	2	0	0	0	2	8	5.66667	0	0	0
hsa-miR-3130-5p	26.6667	27.0833	18	0	0	0	66.6667	27	32	0	0	0	28	42	58	1	0	0
hsa-miR-126-5p	209.2	163.5	129	64	23	0	1390.03	887.9	532.2	1	0	4	218.7	450.333	330.7	0	1	0
hsa-miR-497-3p	0	0	0	0	0	0	3	2	1	0	0	0	0	0	1	0	0	0
hsa-miR-1258	0	0	0	0	0	0	0	0	0	0.0909091	0	0	0	0	0	0	0	0
hsa-miR-3138	68	54.25	63.8333	22.8722	31.3722	17	165.7	88.8333	50.5929	1.62698	0	8.2	65.3333	125.342	69.1667	8	1	5
hsa-miR-676-3p	33	47.5	29	3.5	3	0	177.667	107	50.5	0	1	2	48.5	88	49.5	0	0	1
hsa-miR-4662b	1	0	2	0	0	0	4	4	2	0	0	0	1	3.5	0	0	0	0
hsa-miR-3142	0	0	0	0	0	0	0.0588235	0	0	0	0	0	0	0	0	0	0	0
hsa-miR-6508-3p	2	1	1	0	0	0	5	0	0	0	0	0	2	1	3	0	0	0
hsa-miR-3181	2	3	0	1	1	0	4	2	1	0	0	0	2	2	0	1	0	0
hsa-miR-3927-3p	0	0	0	0	0	0	0	1	0	0	0	0	0	0	0	0	0	0
hsa-miR-6721-5p	3	0	0	2	2	0	6	2	1	0	0	0	2	3	5	0	0	0
hsa-miR-5193	0	1	1	0	0	0	6.7	0	1	0	0	0	0	1	1	0	0	0
hsa-miR-376b-3p	0	1	0	0	0	0	0	0	0	0	0	0	0	0	0	0	0	0
hsa-miR-4259	0	0	0	0	0	0	0	0	0	0	0	0	0	0	0	0.143541	0	0
hsa-miR-566	0	0	0	0	0	0	0	0.166667	0	0	0	0	0	0	0	0	0	0
hsa-miR-139-3p	19	17	19	36	75	0	109.5	66	57	2	1	1	23	40	31	6	0	1
hsa-miR-4520a-5p	0	0	0.5	0	0	0	0	0	0.333333	0	0	0	1	2.33333	0.5	0	0	0
hsa-miR-491-3p	78	67	51.5	11	1	0	156	90.5	51.5	0	0	6	69	152.5	99.4167	0	0	0
hsa-miR-371a-5p	1463.2	1169.63	1535.56	890.519	639.044	114.6	1227.01	601.16	467.2	16.5	7.1	31.5	1139.29	1745.2	1503.16	89.2	71.5	177
hsa-miR-4778-3p	0	0	0	0	0	0	0	0	1	0	0	0	0	0	0.125	0	0	0
hsa-miR-4659a-5p	3	3	0.5	2.5	1.7	0	8	2.83333	2	0	0	0	1.5	1.5	4.5	0	0	0
hsa-miR-942	1110.58	775.244	877.617	25	68.2	103.405	2849.16	1341.23	979.493	4	0	20	1048.12	1969.32	1639.68	6	1	3
hsa-miR-4642	1	0	2	0	0	0	2	4	1	0	0	0	3	7	3	0	0	0
hsa-miR-422a	33.4783	54.1298	23.2909	17.8917	13.9242	1.75	85.2877	52.1517	34.4234	1.1	0	3.18333	31.4854	56.3505	35.2576	1.20397	2.43333	4.45
hsa-miR-152	5267.4	4184.46	4001.69	672	556.983	127.167	9819.04	5714.38	3408.86	135.083	62	236.2	4553.89	7602.6	4778.04	41	82.5	240.25
hsa-miR-376c-3p	0	3.16667	0	0	1	0	2	5	0	0	0	0	0	0	0	0	0	0
hsa-miR-4724-3p	0	0	0	0	1	0	0	0	0	0	0	0	0	0	0	0	0	0
hsa-miR-873-3p	0	0	0	0	0	0	1	0	0	0	0	0	1	0	0	1	0	0
hsa-miR-30b-5p	4382.3	2521.62	3783.7	856.125	300.25	43.5	11981.6	6958.95	4689.9	57.5	13	29	4366.18	8301.71	8371.58	17.8125	4	19
hsa-miR-9-3p	74	81	60.375	0	8	0	122.75	81.2	53	0	0	0	94.125	195.306	160	0	0	0
hsa-miR-5687	1	0	2	0	1	0	3	0	2	0	0	0	0.5	3	5	0	0	0
hsa-miR-4758-3p	9	8	6.5	0	6.08333	0	21.3333	9	3	0	0	0	14.3333	9.16667	7.5	0	0	0
hsa-miR-362-3p	24	17	15	4	0	0	106	60	21.5	0	0	0	19	41.5	36	0	0	0
hsa-miR-1263	2	0	2	0	0	0	0	1	0	0	0	2	1	4	0	0	0	0
hsa-miR-4697-5p	0	0	0	0	0	0	0	0	0	0	0	0	0	0	1	0	0	0
hsa-miR-4429	20.3333	21.3333	14.1667	22.7838	28.9505	14.286	51.5833	30.4262	23.9167	4.08333	3	7.92361	37.9292	37.7047	17.5667	3.33333	0	0.5625
hsa-miR-3911	11	9	10	6.63333	5.4	3	27.5	15	7	0	0.5	0.666667	7.7	9	7.2	0.5	0	0.5
hsa-miR-3684	14	11	11	3	1	0	27	21	11	0	0	0	14	31	13	0	0	0
hsa-miR-1257	10.5333	5.14286	3.33333	0	0	0	30.75	13.8333	7.66667	0	0	0	6.33333	7.66667	7.79167	0	0	0
hsa-miR-3646	2	0	0	0	0	0	0	1	1	0	0	0	0	0	0	0	0	0
hsa-miR-4667-5p	2.5	4	1	3	1	0	3	0	6	0	0	0	0	2	4	0	2	0
hsa-miR-146b-5p	8754.4	8977.93	7560.1	524.361	518.5	382	15426.9	11038	5719.42	838.75	529.25	1075.08	10719.9	17969.8	10794.8	109.583	107.5	118.5
hsa-miR-378a-3p	30356.5	38777.6	20767.4	8964.91	6469.76	1932.81	73474.7	44338.1	28629.3	599.547	282.315	1639.14	26254.9	49990.7	26406.2	596.537	1238.66	2838.22
hsa-miR-4789-5p	0.5	0	2	0	0	0	4	0	0	0	0	0	0	0.533333	0	0	0	0
hsa-miR-4686	3	0	0	0	0	0	1	0	2	0	0	0	1	1.06667	2	0	0	0
hsa-miR-133b	0	0	0	0	0	1.66667	0.333333	0.666667	0.333333	0	0	0	0	0.833333	0	0.333333	0	0
hsa-miR-3663-5p	0	0	0	0	0	0	1.09091	0	0	0	0	0	0	2	1	0	0	0
hsa-miR-548ah-3p	0	0	0.166667	0	0	0	0.0909091	0.2	0.0909091	0	0	0	0.190909	0.0909091	0	0	0	0
hsa-miR-4728-3p	7.83333	10	13	7.5	15	5	32.7	19	14	0	0	0	7	16	18	0	0	1
hsa-miR-3191-3p	7	11	7	3	0.111111	0	25	16	14	1	0	5	7	18.5	17	0	0	0
hsa-miR-572	0	0	0.5	0.5	0	0	0.5	0	0	0	0	0	0	1	0.5	0	0	0
hsa-miR-548q	2.73718	1.41026	2.33333	0.5	0	0	7.29103	2.8631	2.14286	0	0	0	2.11667	10.7429	2.89744	0	0	0
hsa-miR-4664-3p	1208.02	1572	750.867	39.2	60.2	151.983	1477.17	925.833	803.35	5.25	6.45	19	747.583	1613.17	937.45	47	27	32.5
hsa-miR-4659b-5p	59	50	45	3.5	11.7	0	139.333	61.8333	49.5	0	1	0	62	83.2	89	0	0	0
hsa-miR-15b-5p	5598.59	3749.24	4546.41	176.3	200.281	9.2	12383.9	6255.58	4131.54	4	5.33333	16	5206.14	9488.59	7456.91	1	9	14
hsa-miR-1914-5p	18	14	18	0	1	0	32	33	18	1	0	0	17	25	19	4	0	2
hsa-miR-328	460.783	276.75	493.517	23.2	33.5	8	2476.75	1111.26	1205.88	4	0	1	483.367	698.979	890.677	6	18	9
hsa-miR-3648	3	0	3	0	0	0	1	0.25	0	0	0	0	3	5.08333	2	0	0	0
hsa-miR-330-5p	1459.38	895.005	935.269	93.35	99.051	12.8333	3381.47	1701.75	1354.94	4	4.16667	10.7667	1215.55	2804.17	1829.32	4.03333	1	14
hsa-miR-3197	0	0	0	0	1	0	1	1	2	0	0	0	1	0	0	0	0	0
hsa-miR-139-5p	523.25	400	372.5	2275.57	2192.5	161.5	2265	1238.2	1267.92	16	19	116	776	2208.64	1553.83	67	32	79
hsa-miR-941	2181.61	1360.32	1898.77	82.25	105.044	115.929	4255.99	2221.14	1959.92	10.8571	10.8571	34.7253	1754.04	2359.52	2125.14	76.6786	37.9365	88.75
hsa-miR-4795-5p	0	0	0	0	0	0	2	0	0	0	0	0	0	1.5	0	0	0	0
hsa-miR-181b-3p	272.5	355.344	282.95	1	1.2	1.4	280.45	142.367	76.7	2	0	0	276.1	327.278	277.326	2	0	3
hsa-miR-301a-5p	1323.17	737.333	1099.03	17	50	1	1898.08	972.321	598.333	3	2	15	1054.48	2058.98	1230.08	1	0	1
hsa-miR-889	2	1	0	0	0	0	3	3	1	0	0	0	0	0	1	0	0	0
hsa-miR-937-5p	5	2	5	0	0	0	6.33333	4.33333	2.43333	0	0	0	5	4.33333	2.33333	0	0	0
hsa-miR-548ap-3p	0	0.2	0	0	0	0	0	0	0	0	0	0	0	0	0.2	0	0	0
hsa-miR-492	0	0.5	0	3.33333	4.91667	0	0.5	0	0.2	1	0.5	0	0	0.5	1.5	0.333333	2	0.5
hsa-miR-4756-5p	0	0	0	0	0	0	1	0	0	0	0	0	0	1	0	0	0	0
hsa-miR-340-3p	2428.6	1505.83	1454.42	7	44	37.3333	6502.39	3291.11	2826.11	9	7	19	1838.03	4233.12	2241.53	1	2	3
hsa-miR-597	32	27	27	0	0	0	95.5	41	45.0909	0	0	0	43	53	40.5	0	0	0
hsa-miR-3175	59.5	100	49	4	11	14	258	152	99.3333	0	1	2	63	124	81	5.5	4	2
hsa-miR-3158-5p	429.786	679.236	289.025	50	37	25.1818	994.905	520.945	356.083	11.5714	8	18	440.667	631.7	344.815	13.5	12.6667	21
hsa-miR-3160-3p	1.2	3	2.16667	1	0	0	7.4	7.16667	0	0	0	0	7.28571	5.66667	6	0	0	0
hsa-miR-4632-3p	0	0	0	0	0	0	0	0	1	0	0	0	0	0	0	0	0	0
hsa-miR-4446-5p	0	2	0	0	0	0	1	6	4	0	0	0	2	0	1.5	0	0	0
hsa-miR-4742-5p	10	4	11	1	2	0	20	9	6	0	0	0	8	15	17.5	0	0	0
hsa-miR-451a	24.5	29.8333	33.8333	47	82.1667	2	142.25	61.75	24.0833	16.5	6	8	20.0833	111.476	84.7458	17	9	12
hsa-miR-126-3p	6189	4702	2912.75	155	251	42	29568.3	15026.4	12139.9	49	30	73	4909.5	12242.5	6177.75	8	11	17
hsa-miR-548ag	0	0	0	0	0	0	0.25	0	1	0	0	0	0	0	0	0	0	0
hsa-miR-1237-3p	13	11.5	30	1	2	7	49.5	20.3333	18.8333	0	0	0	10	37.2	15.1667	0	0	0
hsa-miR-3194-3p	1	0	0	0	0	0	1	0	0	0	0	0	0	0	1	0	0	0
hsa-miR-4517	81	48	70	2	0	0	163	80	43	0	0	0	57	155	92	0	0	0
hsa-miR-155-3p	0	1	0	0	0	0	0	0	0	0	0	0	0	0	0	0	0	0
hsa-miR-3128	25	20.6667	25	3	0	0	52	29	18.3333	0	0	0	31	49.75	38.25	1	0	2
hsa-miR-526a	3.83333	2.8	1.7	0.9	0	0	0.8	0.4	1.7	0	0	0	0.5	3.45	0.8	0	0	0
hsa-miR-4709-5p	4.75	5	2	0	3	0	23.2	14	7	0	0	0	7	8.25	6.5	0	0	0
hsa-miR-4661-3p	6.5	12.8333	7	0.5	0	0	32	19	13	0	0	0	3.5	12.5	9	0	0	0
hsa-miR-2277-5p	552	376.5	450.083	29.5	34	10	1168.49	608.417	471.643	5	0.5	7	518	869.333	703.292	2	2	6
hsa-miR-3125	0	1	0	1	0	0	0	1	0	0	0	0	0	0	1	0	0	0
hsa-miR-4444	0	0	0	0.952381	0	0	0	1.5	0	0	0	0	0	0.666667	0	0	0	0
hsa-miR-4498	5	6	4	0	0	0	16	18	9	0	0	0	4	21.125	12	3	3	2
hsa-miR-103a-3p	171652	141450	132801	3634.44	4065.3	620.733	432103	226642	156030	250.667	117.9	756.798	166062	266728	202374	130.015	186.864	673.149
hsa-miR-4472	0	0.222222	0	0	0	0	0.166667	0	0	0	0	0	0	0	0.166667	0	0	0
hsa-miR-501-5p	487.75	301	331.583	14.0714	22	29.5	1446.53	838.75	729.333	1	1	0	376	862.033	638.5	0	2	1
hsa-let-7i-3p	626	462	561	29.2	26.3333	7	1398.5	838	628	3	0	3	623	1157	1194.5	0	0	0
hsa-miR-342-5p	0	0	0	0	0	0	0	1	0	0	1	0	0	0	0	0	0	0
hsa-miR-5702	3	5	7.5	0	1	0	6	4.5	1	0	0	0	6	15	5	0	0	0
hsa-miR-199b-5p	16	12	10	1	4	0	54.3333	26	28	1	0	0	48	65.3333	47.4762	0	0	0
hsa-miR-518e-3p	43.5	12.5	22.5	5	2	0	6	9	1	0	0	0	16	30.3333	12	0	0	0
hsa-miR-1229-3p	32.5	27.25	31	3	15.8333	0	145.825	68.85	66.4167	0	0	0	22	42.5	53.1667	0	0.222222	0
hsa-miR-642a-3p	56.1	50	53	23.4017	15.1429	45.4	105.333	61	32.1667	0	1	2	58	95.9444	62.8485	11	0	3
hsa-miR-5580-5p	36	35.3333	39	2	3	0	111.577	38	40.1667	0	0	0	30	60.7	89.3333	0	0	0
hsa-miR-1284	66.8333	63.3333	48	1	3	0	205.833	112	75.5	0	0	4	62	96.8333	72	3	4	0
hsa-miR-1229-5p	2	1	3	0	1.39091	0	8	4	3.33333	0	0	0	2	5	3	0	0	0
hsa-miR-3185	1	0	0	0	0	0	0	2	0	0	0	0	0	1	0	1	0	0
hsa-miR-4270	0	0	0	0	0	0	0	0	0	0.5	0	0	0	0	0	0	0	0
hsa-miR-4781-5p	0	0	0	0	0	0	0	0	0	0	0	0	0	3	0	0	0	0
hsa-miR-556-5p	639.124	375.667	251.458	4.33333	5	0	871.641	434.931	320.9	0	0	1	378.193	914.636	498.375	2	0	0
hsa-miR-519a-5p	8.33333	8.66667	8	2.5	0.833333	0	2.66667	1.47619	2.30952	0	0	0	2	9.16667	4.30952	0	0	0
hsa-miR-5094	24.3333	20	25	1	3	0	86.3333	53	36.1667	0	2	0	26	24.75	30	0	0	0
hsa-miR-3653	8.97549	8.36667	6.5	18.6303	3.96032	0	47.2095	23.5333	17.136	12.6667	10.5714	21.3333	10.0667	17.8333	12.3333	0	0	2.5
hsa-miR-145-3p	1	3.25	1.25	3	10	0	3.5	6	0	0	0	0	0	1.25	2	0	0	0
hsa-miR-2116-5p	8	2	1	0	0	0	4	6.5	4	0	0	0	4	9	4	0	0	0
hsa-miR-4741	15	10.1667	14	30.8429	48.0343	16.25	31	25	18	7.5	2	16.0833	10	10.8333	24	22.6667	7	4
hsa-miR-208b	0	0	0	0	0	0	0	0	0	0	0	0	0	0	1	0	0	0
hsa-miR-1915-5p	4	2	0	2	1	0	6	5	7.2	0	0	0	2	9	4	0	0	0
hsa-miR-224-5p	1544.67	1340.83	1424.75	1695.54	1516.33	287	8589.09	5028.81	3758.4	196	114	364.5	2058.5	3160	2258	42	45	30
hsa-miR-548t-5p	10.5	5	10.5333	2.5	0	0	21.95	5.7	4	1	0	2	11.5929	6.66667	8.36667	1	0	0
hsa-miR-29c-3p	428.613	381.25	303.943	100.473	43.5429	2	1072.75	627.05	442.155	3.5	0.666667	0.833333	464.653	814.937	667.335	2	1	0.738095
hsa-miR-1539	0	0	0	0	0	0	0	0	1	0	0	0	0	0	0	0	0	0
hsa-miR-483-5p	30.6576	21.625	15.25	90.5687	88.1833	26.75	68.125	37.375	15.4083	1.21591	3.5	6.2	19	31.1667	38.7917	6.5	0	9
hsa-let-7f-5p	346093	381661	388872	26207.9	28206.4	5663.86	815588	466320	255856	10592.2	5472.08	20546.5	395552	687162	505435	2576.01	3106.08	9024.69
hsa-miR-4745-5p	10.75	19.5	1.75	8.25	16.4464	0	43.4583	29.75	20	0	0	3	16.25	29.35	20.0833	9	2	1
hsa-miR-6511b-5p	6	8	5.05714	3.86508	8.6746	3.42857	17.5714	11.1429	6	0	0.571429	0.571429	7.64286	12.5714	12	1.42857	0	2.82143
hsa-miR-3675-3p	0	0	0	0	0.1	0	0.2	0	0	0	0	0	0	0	0	0	0	0
hsa-miR-144-3p	4	1.16667	0	0	0	0	24.0333	13.5	5	0	0	0	1	6.125	7.5	0	0	0
hsa-miR-4700-5p	1	0	0	1	3	0	6	0	0	0	0	0	0	1.5	1	0	0	0
hsa-let-7d-5p	27285.3	26725.6	25683.1	4768.17	10505.4	1486.01	80939.8	41161.2	28947.3	486.793	406.083	1641.5	29108.8	61983.9	48309.1	409.393	240.65	588.667
hsa-miR-4442	0	0	0	0	0	0	0	0	1	0	0	0	0	0	0	0	0	0
hsa-miR-520h	2.7	0	2.5	0	0.5	0	1.64286	0	0.5	0	0	0	0	0.5	1	0	0	0
hsa-miR-4713-5p	58.3333	39.25	59.0833	8.5	5.83333	0	211.333	110.167	96	0	0	1	55.5	70.5	105.139	0	0	0
hsa-miR-2964a-5p	116.5	97.5	90	3.33333	4	15.5	271.75	159.333	107.5	0	3	0	119	189.559	147.333	0	0	0
hsa-miR-499a-5p	683.95	579.833	449.905	6	12.5	2	2338.35	1415.56	823.31	1	3	2	751.158	1343.03	1101	0	5	2
hsa-miR-4532	0.5	0	0	13.106	8.42268	2.25	2	0.5	0	1.75	0.376692	2.27193	0	0.2	0.75	1	0.105263	0.111111
hsa-miR-3607-5p	1.11111	1.44444	0	0	0	0	0.222222	0.396825	10.1111	0	0	0	0	1.44444	1.22222	0	0	0
hsa-miR-374a-3p	2880.16	1917.08	2818.99	11	5.5	1	4838.88	2981	1211.17	6	0.666667	2.5	3195.36	4989.73	2911.07	0	0	2
hsa-miR-30e-5p	58941	39183.3	46798.3	2308.63	1366.98	212.5	95893.6	57806	39000.5	95.1429	38.5	146	56364.2	94510.2	68370.6	62	43.5	57.7
hsa-miR-141-3p	7508.92	6018.4	5116.04	379.167	136.667	25.5	16364.2	9208.78	4880.88	38.6667	6.5	14.75	7847.07	15195.3	11786.9	5.5	2	16.8333
hsa-miR-1271-5p	8.33333	6.03333	4	0	1.66667	0	96.1583	45.9	29.6667	2	0	0.2	21.25	12.5	9.41667	0	0	0
hsa-let-7c	2605.23	2386.13	2389.81	533.406	752	112.161	6236.05	3270.35	2037.07	185.2	170.65	529.361	2983.83	6308.69	3915.09	86.5247	22.6309	80.0692
hsa-miR-18a-3p	1028.96	616.867	909.717	47	81.9444	41	3204.76	1545.75	1344.08	6.5	2	12	957.803	1618.71	1789.04	4	4	4
hsa-miR-186-5p	5653.24	4070.48	5168.42	3468.66	2676.66	87.8333	20551.9	12587.2	10564.5	88	64	250.944	6058.58	10428.4	12542	166	89.8333	188.167
hsa-miR-339-5p	2995	1836.84	2104.89	113.721	210.219	229.177	6273.55	2967.92	2670.66	12.1142	4.8547	25.7099	2697.15	4049.21	4812.47	42.8649	13.4747	25.0769
hsa-miR-486-5p	5.2	12.75	13.4762	15	46.4444	44.1667	26.4167	14.5	7.61111	15	6.83333	17.2222	14.5	17.8333	16.5	55.8333	17.5833	33.4167
hsa-miR-378b	7.45428	14.5192	7.10742	10.4036	2.50606	0.75	34.0023	22.4582	21.499	0.25	0	0	14.4951	16.4906	9.91944	0	0.0909091	0.0909091
hsa-miR-3927-5p	0.5	0	0	0	0	0	2	3	0	0	0	0	1	4	2	0	0	0
hsa-miR-3936	1	1	0	4	0	0	0	1	1	0	0	0	1	1	2.5	0	0	0
hsa-miR-4782-3p	0	0	0	0	0	0	5	1	1	0	0	0	0	0.166667	0	0	0	0
hsa-miR-218-5p	3	41	24.4	0	0	0	79	80.8333	42.6667	0	0	0	49.0556	45.5	40.6667	0	0	0
hsa-miR-369-5p	0	2	5	0	1	0	7	9	3	0	0	0	5	4	4	0	0	0
hsa-miR-663b	1	0.1	0.5	0.5	0	0	2.5	0	0	0	0	0	0	1.11111	1	0	0	0
hsa-miR-1279	0	0	0	1	0	0	0	0	0	0	0	0	0	0	0	0	0	0
hsa-miR-656	0	0	0	0	0	0	0	0	0	0	0	0	0	1	0	0	0	0
hsa-miR-135a-5p	62.3333	46.3333	34.7333	1	0	0	53.3333	42.5	23.6667	1	0	1	67.6667	93.1667	71.3333	0	0	0
hsa-miR-3922-5p	0	1	0	0	0	0	2	0	0	0	0	0	1	1	0	0	0	0
hsa-miR-3186-5p	1	0	0	0	0	0	3	1	1	0	0	0.2	3	0	0	0	0	0
hsa-miR-4799-3p	0	1	0	0	0	0	0	0	0	0	0	0	0	1	0	0	0	0
hsa-miR-6723-5p	11.5897	8.61905	4.5671	0	0	0.333333	17.075	12.2576	9.50952	0	0	0.333333	11.7857	42.8627	45.6613	0	0	0
hsa-miR-4745-3p	5	4	6	1	1	0	26	16	8	0	0	4	7	7	9	0	0	0
hsa-miR-376c-5p	0	0	0	0	0	0	0	0	0.5	0	0	0	0	0.5	1	0	0	0
hsa-miR-93-5p	77107.3	46264.2	61952.5	4787.29	3846.68	720.5	153847	73650.5	54983.1	253	140	522	77032.7	112619	96923.1	138	121	238
hsa-miR-1587	0.2	0	0	0	0	0	0	0	0	0	0	0	0	0	0	0	0	0
hsa-miR-4452	0	0	0.25	0	0	0	0	0	0	0	0	0	0	0	0	0	0	0
hsa-miR-548k	857.422	829.01	877.1	22.8333	40.1667	0	2117.53	1228.98	866.745	2.05556	0	3.55556	880.673	1687.58	1206.17	1	3	3
hsa-miR-4725-5p	1	0	0	0	0	0	5	0	0	0	0	0	2	0.5	0	0	0	0
hsa-miR-1236-5p	0	3	0	3	3	0	3	0	2	0	0	0	2	1.125	1.5	0	0	0
hsa-miR-4482-5p	11	9	16	0	1	0	19	15	5	0	0	0	11	16	15	2	0	0
hsa-miR-654-5p	0	0	0	0	0	0	0	2	0	0	0	0	0	1	0	0	0	0
hsa-miR-518f-5p	1	1.4	1.6	0.2	0	0	0.4	0.2	0.6	0	0	0	0	1.725	1.4	0	0	0
hsa-miR-99a-3p	0	0	0	0	0	0	2	2	0	0	0	0	0	0	0	0	0	0
hsa-miR-6511b-3p	39	21	44	6	5	0	96.2889	44.5	51	0	0	0	36.9524	60.5714	66.7333	1	0	0
hsa-miR-4501	0	0	0	0	0	0	4	6	2	0	0	0	0	1	3	0	0	0
hsa-miR-130b-5p	8043.06	7539.44	6661.36	21.2833	70.25	128.083	9051.1	5029.84	3379.74	2.5	1.33333	6	7374.26	15148.1	8549.81	38.125	25.4583	20.5
hsa-miR-3064-3p	4	3	2	0	2	0	17	5	2	0	0	0	0	7	6	0	0	0
hsa-miR-1251	22	5	10	0	0	0	27	16	14	0	0	0	16	39	24	0	0	0
hsa-miR-6509-3p	4	1.5	4.5	0.5	0	0	8.83333	3.33333	2.33333	0	0	0	5	4.5	2.5	0	0	0
hsa-miR-548au-3p	5.5	3	2	0	0	0	5.5	1.5	3.83333	0	0	0	6	9.40476	6.5	0	0	0
hsa-miR-939-5p	4	12.1	12.7	0	3	0	16.3333	10	9.83333	0	2	0	8.33333	11.1909	13	0	2	4
hsa-miR-4772-3p	0	0	0	0	0	0	2	0	0	0	0	0	0	0	0	0	0	0
hsa-miR-485-5p	0	0	1	0	0	0	1	5	1	0	0	0	1	2	1	0	0	0
hsa-miR-3193	14	6	6	0	1	0	13	10	4.5	0.0625	1.07692	1	8	24	18	0	0	0
hsa-miR-4783-3p	4	5	4	0	3	0	35	13	11	0	0	0	3	9	12	0	0	0
hsa-miR-144-5p	2.6	2	1	1	1	0	39	29	20	0	0	0	3	4	7	0	0	1
hsa-miR-892a	0	0	0	0	0	0	0	0	0	0	0	0	0	1.5	0	0	0	0
hsa-miR-379-3p	0	0	0	0	0	0	0	1	0	0	0	0	0	0	0	0	0	0
hsa-miR-1304-3p	1550.61	1384.94	992.389	344.011	264.452	253.227	3459.84	1776.52	1061.52	45.0687	21.1111	116.258	1247.24	2024.63	1335.47	104.061	57.1444	137.148
hsa-miR-122-5p	17.6667	23	15.5	15	44.8333	42.5714	79.9762	61.0952	38.3333	15.4286	22	37.5	17.5	53	29	19.5	13.25	19.5
hsa-miR-4530	0	0	0	0	0	0	0	0	0	0	0	0	0	0	0	0.2	0	0.333333
hsa-miR-206	0	2.125	0	0	0	0	0	0	0.333333	0	0	0.0588235	2	1	1	0	0	0
hsa-miR-136-5p	0	13	4.5	0	0	0	14.5	14	6	0	0	0	5	14.2	14.8333	0	0	0
hsa-miR-24-1-5p	736.558	324.333	502.042	2.33333	4.83333	0	1595	866.125	747.583	2	2	1	555.625	1276.45	863.867	0	0	0
hsa-miR-3689e	0	0	0	0	0.333333	1.66667	0.333333	0	0.333333	0	0	0	0	0	0.333333	0	0	0
hsa-miR-5195-3p	0	0.0588235	0	0	0	0	0	0	0	0	0	0	0	0.0588235	0	0	0	0
hsa-miR-5584-3p	2	0	1	1	0	0	2.5	1.5	0	0	0	0	1	2	1	0	0	0
hsa-miR-5010-5p	1	0	1	4.14286	2	0	1.5	1	0	2	0	0	0	4	0	0	0	0
hsa-miR-6125	0	0	0	0	1.16667	0.333333	0	1	1	0	0	0	0	0	0	0	0	0
hsa-miR-4424	1	2.5	2	0	0	0	4.7	1.1	3	0	0	0	1	2	1	0	0	0
hsa-miR-652-5p	47	34	61	0	0	0	200.5	128	77	0	0	0	78.5	94.1	102	0	0	0
hsa-miR-340-5p	11176.4	7866.29	8914.08	316.383	191.105	68.1	34579.5	21875.2	12998.8	64	21.5	63	12248.6	18147.2	13328.4	14.1818	11	16
hsa-miR-3120-5p	1	0	1	0	0.5	3.5	1	1	0.333333	0	0	0	0	0	1	0	0	0
hsa-miR-3691-3p	5.5	11	14	0	0	4	18.5	14	7	1	0	0	4	9.5	7	0	0	0
hsa-miR-485-3p	0	0	2	0	0	0	0	0	3	0	0	0	0	0	1	0	0	0
hsa-miR-3183	7	2	5.5	1	1	14.5	17	7	7	0	0	0	7	7	3.5	0	0	0
hsa-miR-632	8.27778	6.5	1.5	0	0	0	5.33333	2.5	0.333333	0	0	0	4	3.66667	2.5	0	0	0
hsa-miR-219-5p	119.667	138	121.5	0	0	0	271	140.333	62	0	0	0	126	161.2	157	0	0	0
hsa-miR-3942-3p	5	3	3	0	0	0	12	5	3	0	0	0	3	6.5	13	0	0	0
hsa-miR-25-3p	106192	90719.1	86941.2	5448.6	5602.45	3453.5	181588	95987.5	57539.5	1340.5	811	2138.5	88542.6	159734	97938.2	2482.93	1715.33	3575.5
hsa-miR-1244	0.5	0	0	0.375	2.25	0	1.91667	0	0	0	0	0.5	0.647727	0.75	2.1369	0	0.375	1.25
hsa-miR-4684-3p	103	118	74	10	4	28	304	241.333	127	0	1	1	88	201	123.5	2	3	5
hsa-miR-556-3p	1238.44	811.7	934.06	5	5	0	1702.89	785.558	413.35	0	1	0	758.817	2599.14	1132.32	1	0	0
hsa-miR-373-5p	14	9	16	3	3	0	17	11	0	0	0	0	5.5	16.25	20.5	0	0	1
hsa-miR-1537	0	0	1	0	0	0	1	1	4	0	0	0	0	0	1	0	0	0
hsa-miR-4289	0	0	0.175	0	0	0	0.25	0.05	0.1	0	0	0	0	0.1	0	0	0	0
hsa-miR-1298	0	3	3	1	0	0	2	3	0	0	0	0	3	4.33333	2	0	0	0
hsa-miR-5189	2	0	0	0	0	0	2	0	1.5	0	0	0	0	1	0	0	0	0
hsa-miR-450a-3p	63.5	40.5	43.9444	2	2.5	6	163.396	93.3333	63	1	1	0	46	57.6111	58.5	0	0	0
hsa-miR-3688-3p	25	42.6667	24.6667	18	4	0	63.6667	41	24	0	0	1	29	58.2857	37.8872	1	0	4
hsa-miR-4665-3p	0	0	0	0	0	0.05	0	0	0	0	0	0	0	0	0	0	0	0
hsa-miR-4738-3p	6.5	19.5	7.5	4	5.08333	5	11.75	11.5	6.5	0	2	1	7	19.5	11	1	0	1
hsa-miR-455-3p	18	18	14	1	2	2	220	80.05	54	2	0	0	31.5	49	71.5	0	0	0
hsa-miR-423-5p	15772.7	12124.7	17122.1	6162.38	8618.73	11263.4	42777.6	23259.9	17966.1	1493.25	1243.4	4473	17259.1	24361.6	24357.8	4917.27	1532.24	2158.24
hsa-miR-3922-3p	0.5	1.5	1	0.5	0	0	0.5	4.33333	0	0	0	0	1.58333	1	3.5	0	0	0
hsa-miR-425-5p	173102	86176	114699	1938.91	2883.57	1406.88	266311	158540	159983	172	92.1	290.782	122876	333717	179245	247.562	76.25	122
hsa-miR-181c-5p	51	18	28	58	6	0	140	98	97	0	0.5	2	72	94.5	86	3	0	0
hsa-miR-6717-5p	0	0	0	0	0	0	0	0	0	0	0	0	0	0	0	0	0.166667	0
hsa-miR-499b-5p	4	2	4	0	0	0	9	11	7	0	0	0	9	9	9	0	0	0
hsa-miR-338-3p	240.333	149.5	188.278	54	78	10	523	300	270	2	0	2	243	521.917	512.111	0	0	1
hsa-miR-200a-3p	327171	276390	278285	11239.2	7271.71	993.75	949473	576665	376113	1166.26	437.5	1233.08	342000	647645	626212	462.6	325	621.083
hsa-miR-211-5p	0.0833333	14.044	10.0095	0	0	0	29.3286	24.123	14.6269	0	0	0	22.7262	23.0167	18.4476	0	0	0
hsa-miR-509-5p	9	9	5	0	1	0	313.333	163	99	2	0	0	12	25	16	0	0	0
hsa-miR-767-5p	2	1	0.5	0	1	0	0	1	0	0	0	0	0	1	1	0	0	0
hsa-miR-944	0	0	2	0	0	0	2	2	0	0	0	0	0	0	0	0	0	0
hsa-miR-3184-3p	15772.7	12124.7	17122.1	6162.38	8618.73	11263.4	42777.6	23259.9	17966.1	1493.25	1243.4	4473	17259.1	24361.6	24357.8	4917.27	1532.24	2158.24
hsa-miR-29b-1-5p	600.167	346.183	475.583	8.25	28.6111	1	1134.42	514.833	352.111	0	1	1	554	1045.02	912.5	0	0	4
hsa-miR-548ac	2.2	1	0	0.5	1.5	0	14.2	6	2	0	0	0	1	0	3.5	0	0	0
hsa-miR-4436b-5p	3	0	0	1	0	0	0	1	0	0	0	0	2	2.66667	4	0	0	0
hsa-miR-3121-5p	0	1	0	0	0	0	0	0	1	0	0	0	2	0	0	0	0	0
hsa-miR-4523	9	6	12	1	1	0	30.5	22	13	0	0	0	19	6	14	0	0	0
hsa-miR-219-2-3p	112.5	96.5	88	3.33333	4	15.5	266.75	155.333	105.5	0	3	0	114	183.559	140.333	0	0	0
hsa-miR-515-3p	1	0	0	0	0	0	0	0	0	0	0	0	0	0	0	0	0	0
hsa-miR-5694	1	1	2	0	0	0	2	3	0	0	0	0	2	5	2	0	0	0
hsa-miR-3659	0	0	0	0	0	0	8	3	3	0	0	0	1	2	0	0	0	0
hsa-miR-3679-3p	14	8	9	1	1	13.5	27	13.3333	18	0	0	0	10	12	20	0	0	0
hsa-miR-140-3p	15416.5	20112.7	10780	4786.17	1720.81	1565.93	37530.7	24559.2	14396	1433.21	563.571	1379.92	16038.5	24805.1	14125.6	422.343	384.55	621.625
hsa-miR-6134	0	0	0	1.14286	0.233766	0	1.18254	1.26429	0.142857	0	0	0	0.67619	0.5	0.85	0	0	0
hsa-miR-625-5p	1303.83	824.476	1014.71	87.9583	74.8333	253.194	3554.08	1736.34	1772.76	72.5	39.75	54.0333	1229.42	1534.16	1511	9.83333	2	3
hsa-miR-369-3p	0	4	1	0	0	0	3.25	8.25	1	0	0	0	0	1	5	0	0	0
hsa-miR-203b-5p	38065.5	28541.5	24661.5	1782.94	1750.55	1458.7	61436.3	34856.8	22931.4	879.175	461.089	1018.38	39624.2	61374.4	36432.7	233.566	256.375	459.3
hsa-miR-132-3p	1424.45	1192.67	915	633.6	282.035	95	3974.33	2123.53	1619.67	24	13	21	1410.11	3116	1787.25	13	8	16
hsa-miR-3164	50.3333	84.8333	39.5	10	8	0	117.833	70.5	24	0	0	0	42	105.333	39.8333	2	0	6
hsa-miR-365b-3p	203.583	140.192	236.9	36.8667	37.5833	0	1252.87	599.767	615.033	1	0.833333	1	227.393	311.952	396.95	0.5	1	1.5
hsa-miR-216a-5p	0	0	0	0	0	0	1	1	0	0	0	0	0	1	1	0	0	0
hsa-miR-514a-5p	2	0	0	0	0	0	45	27	13	0	0	0	4	1	3	0	0	0
hsa-miR-3190-5p	0	3	5	0	0.111111	0	16	8	11	0	0	4	5	10.5	11	0	0	0
hsa-miR-639	0	1	0	0	0	0	0	1	3	0	0	0	1	0.2	0	0	0	0
hsa-miR-4467	7	7	12	3	2	0	20	12	12	0	0	0	7	13	19	0	0	2
hsa-miR-155-5p	407	293	421	38	54	14	96	58	52	8	6	20	540	1487.5	995	6	1	20
hsa-miR-548x-3p	2.125	0	2	0.125	0	0	2.25	0.333333	0.0625	0	0	0	0.25	0.0625	4.11111	0	0	0
hsa-miR-6514-3p	7	6.5	11.5	1	0	5	26.6667	17	8.14286	0	0	0	7.25	20.8333	16	0	0	0
hsa-miR-4694-3p	0	0	2	0	0	0	4	0	0	0	0	0	0	0	0	0	0	0
hsa-miR-3144-5p	1	0	0	0	0	0	1	2	0	0	0	0	0	0	0	0	0	0
hsa-miR-548h-5p	0.555556	0.555556	0.166667	0	0	0	0.142857	0	0.680556	0	0	0	0.805556	1.41667	0.555556	0	0	0
hsa-let-7d-3p	1357.33	1224.73	1291.31	1047.16	2776.52	607.867	4772.26	2781.14	2711.06	67	38.25	136.5	1559.12	1893.19	2803.71	376.375	130	191.143
hsa-miR-130a-3p	1	0	0	1	0	0	0	0.5	2	0	0	0	1	0.333333	0	0	0	0
hsa-miR-4736	0	0	0	0	0	0	0	0	1	0	0	0	0	0	0	0	0	0
hsa-miR-3652	0.5	0.642857	0	0	0	0	0	0.833333	0	0	0	0	1.33333	0.4	0	0	0	0
hsa-miR-5004-5p	0	1	0	0	0	0	2	0	0	0	0	1	0	3	1	0	0	0
hsa-miR-1275	134.354	93.7623	84.7567	51.7952	7.11429	0	186.389	99.8303	77.8055	3.48571	0.857143	1.7	131.139	220.134	176.243	3.04286	0.142857	0.714286
hsa-miR-500a-3p	1639	1323.89	1457.7	269.154	238.5	46	6537.44	3415.7	2459.5	47	19.5	88.5	1713.68	2288.42	1888.66	19	24	60
hsa-miR-142-3p	1290.03	959.2	794.786	3	6	8	3103.76	1660.58	956	0	0	2	1230.17	2446.88	1616	0	0	0
hsa-miR-4474-5p	1	1	1	0	0	0	0.7	1	0	0.0769231	0	0	0	2	0	0	0	0
hsa-miR-520d-5p	5.83333	1.5	3	1	0	0	1	0	0.333333	0	0	0	0	3	0	0	0	0
hsa-miR-22-3p	88842.2	79826	60679.6	46646.1	17663	5173.64	153358	96097.5	74241	550.417	259.123	892.667	81248.4	191207	136197	460.583	291.167	552.238
hsa-miR-411-5p	0	17	8	0	1	0	22	30	7	0	0	0	14.3333	14	18	0	0	0
hsa-miR-570-5p	1.66667	1.09091	2.83333	0.25	0	0	7.76667	3.5	3.33333	0	0	0	1.33333	4.16667	5.75	0	0	0
hsa-miR-4485	121.264	47.1151	53.8667	0.666667	2.125	0.333333	164.713	121.208	97.9588	0	0	0.666667	76.5069	194.59	429.325	0	0	0.333333
hsa-miR-5187-5p	0	1	0	0	4	0	1	0	0	4	0	1	4	0	1	0	0	0
hsa-miR-4428	0	1	0	0	0	0	0	2	0	0	0	0	0	0	0	0	0	0
hsa-miR-4646-3p	7.83333	6.83333	8.325	0	0	0	30.0595	11.25	18.5333	0	0	0	5.33333	11	8.7	0	0	0
hsa-miR-1247-3p	3777.29	4583.96	2247.68	128	173	101	9283.02	5819.84	3391	41.5526	54	82	2920.45	5450.22	2803.33	74	46	88.5
hsa-miR-3529-5p	0	0	0	0	0	0	0	3	0	0	0	0	0	1	1	0	0	0
hsa-miR-4653-3p	5	4	8	1	5	0	14	8	6.33333	1	1	1	2	11	6	0	4	0
hsa-miR-5090	4	3	5	1	2	0	14	5	1	0	0	1	8	3	3	0	0	0
hsa-miR-95	211.433	241.942	158.931	49.5917	35.7167	0	1772.9	998.769	563.279	36.85	25	47.925	340.658	559.864	364.578	2	0	3
hsa-miR-365a-3p	203.583	140.192	236.9	36.8667	37.5833	0	1252.87	599.767	615.033	1	0.833333	1	227.393	311.952	396.95	0.5	1	1.5
hsa-miR-27a-3p	67533	56103.2	42084.5	20217.4	12441	1232.23	115009	62046.5	40238.6	645.285	274.562	668.994	74177.2	147622	110019	388.747	208.521	291
hsa-miR-3179	175	157.35	206	26.75	56.75	2	629.5	337	266.75	0	2	17	202.25	383	370.35	1	0	2
hsa-miR-744-3p	426.611	322.667	229.833	24	32	14	707.198	476.95	378.454	2	1	0	292.333	696.861	507.91	2	0	2
hsa-miR-671-5p	1172	913.333	920.833	159.825	137.908	26	4093.69	2038.87	1196.17	14.6	4	10.1111	1218.76	2205.96	1936.9	0.2625	4	3.0625
hsa-miR-3152-5p	1	2	1	0	0	0	8	3	1	0	0	0	0	3	1	0	0	0
hsa-miR-3919	0	0	1	0	0	2.33333	1.83333	0	0.5	0	0	0	0	2	1	0	0	0
hsa-miR-539-5p	0	0	0	0	0	0	1	0	0	0	0	0	0	0	0	0	0	0
hsa-miR-3124-3p	0	0	0	0	0	0	1	0	1	0	0	0	0	1.07143	1	0	0	0
hsa-miR-138-2-3p	6	1	5	3	2	0	13	9	13.1429	0	0	0	1	6	0	0	0	0
hsa-miR-33b-5p	2.16667	6.66667	2.64286	1	0	0	20.3333	8.97619	1.5	0	0	0	11.1667	6.5	15.3111	0	0	0
hsa-miR-3916	13.6429	6.43956	4.77692	0.5	1	0	23.4167	7.2	6	1.47619	0	0.5	10.7857	17.5452	12.5769	0.5	0	0.642857
hsa-miR-502-3p	875.667	651.226	741.101	307.987	226.5	47.5	3490.81	1694.12	1304.58	23	12	58.5	935.26	1285.67	1205.7	4.5	2	15
hsa-miR-3937	1	2	4	1	0	0	0	1	1	0	0	0	8	13	1	0	0	0
hsa-miR-3170	19	17	29	3	3	0	65.3333	32.5	22.625	0	0	0.5	21	39.3333	38	0	0	0
hsa-miR-510	0	0	0	0	0	0	6	1	2	0	0	0	1	0	0	0	0	0
hsa-miR-4754	3	8	9	0	0	0	29	8	3	0	0	0	17	15	12	0	0	1
hsa-miR-3064-5p	39.1111	31.5	27.75	4.2	6.1	2	99.3111	45.3125	30.0167	0.25	0	0	31.7667	40.4667	39.0833	2	0	1
hsa-miR-509-3-5p	35	19	24	0	0	0	755.056	439.25	325.5	10	1	12	34	60	33	0	0	0
hsa-miR-1266	201.5	263.091	219.333	67.5	53.5	39	410	274.833	180.5	9	4	25.5	211	272.5	222	13	5	32
hsa-miR-34c-5p	3	0	0	1	1	0	4	1	2	0	0	0	1	11	5	0	0	0
hsa-miR-522-3p	58.5	45	28	2	0	23	12	3	8.5	0	0	0	32	53	52	0	0	0
hsa-miR-3689b-5p	0	0	0	0	0.333333	1.66667	0.333333	0	0.333333	0	0	0	0	0	0.333333	0	0	0
hsa-miR-4306	0	0	0.153846	1.63462	1	0.307692	0.384615	0.615385	0.326923	0	0	0.153846	0.111111	0.230769	0.230769	0	0	0
hsa-miR-4515	9	9.5	8	2	1	0	31	33.5	9	0	0	0	11	16	6	0	0	3
hsa-miR-3918	23.5	30.3333	34.5	4	7.2	26.5	55.5	43	32.5	0	0	5	31	47	35	1	0	1
hsa-miR-1254	329.083	295.762	319.952	13	20	7	705.222	414.619	300.833	0	3	6	302.833	552.88	525.25	3	6	4
hsa-miR-373-3p	658.5	515.5	657	498.25	198.5	21	673.75	379	232.5	0	0	2	541.333	1091.5	1044	1	1	9
hsa-miR-365b-5p	98.8333	75	75	10	11.0769	0	368.333	181	146.5	0	0.5	7	92	155.75	90.6	0	0	2
hsa-miR-4755-5p	30.1111	22.5833	13	1	1	3.5	40.3333	20	15.625	0	0	0	26.25	61	34.2	0	0	0
hsa-miR-4802-3p	48	52	33.5	6	2	0	190	112.5	72	0	0	0	62	78	69.5	0	0	0
hsa-miR-3619-3p	43.5	45.0833	46.3333	2	1	0	134.5	67.6	55	0	0	0	33	69.3333	91.3667	0	0	0
hsa-miR-192-3p	15	22	8	2	1	0	49	23.5	28	0	0	0	16	30	19	0	0	0
hsa-miR-548aj-3p	0.392857	0	0.133333	0	0	0	0	0	0	0	0	0	0	0	0	0	0	0
hsa-miR-185-5p	10858.3	10138.2	12355.5	1219.16	971.724	168.474	43488.4	19456.7	13651.3	41	20	160.987	13397.2	18066.9	20253.6	18.5909	27	80.3333
hsa-miR-3127-5p	37.5	35	38.5	23	20.25	16	161	68.1667	56	1.5	1	9	41.1429	85.8333	55	2	2	8
hsa-miR-873-5p	0	1	0.5	0	0	0	1.5	0	0	0	0	0	2	1	0	0	0	0
hsa-miR-3180-5p	7.2	8.3	4.2	1.8	0.6	0	36.4	17.3	25.2	0	0	0.6	5.4	13.2	6.6	0	0	1.8
hsa-miR-517a-3p	89.8333	66.1667	66.5	7	4.5	7.5	39.5	11.3333	17	0	0	0	28	87.5	67.3333	2	0	0
hsa-miR-5698	14.8333	23	21.5	0.333333	0.5	0	72.7167	36.3833	25.3333	0	0	2	8	41	19.5	0	0	4
hsa-miR-2114-5p	0	0	0	0	0	0	0	0	0	0	0	0	0	0	1	0	0	0
hsa-miR-4477b	8	2.5	3.5	0.5	0	0	13.6667	7	2	0	0	0	4	8	3	0	0	0
hsa-miR-548ah-5p	1.06667	0	0	0	0	0	1	0	0	0	0	0	0	0	0	0	0	0
hsa-miR-7-2-3p	0	0	0	0	0	0	0	3	0	0	0	0	0	1	1	0	0	0
hsa-miR-1180	15680.5	9758.78	11137.1	673.168	1365.01	946.333	24868.3	13394	12956.5	39.25	17	94.3333	12278.7	21766.5	19069.8	281.5	112.083	141.333
hsa-miR-222-5p	161.231	102.487	110.333	131.356	144.844	0	160.064	90	68.45	4.5	6	15	147.75	193.583	201.925	6	9	22
hsa-miR-1468	27	40	17	4	1	0	224	127.167	77.75	0	2	1	34	60	32	2	3	4
hsa-miR-542-3p	2564.93	2486.48	1854.28	7	8	2	5003.23	2906.1	1584.94	2.5	0	4.14286	2155.33	2569.06	2023.15	0	0	1
hsa-miR-6077	1	0	1	0	0	0	0	1	0	0	0	0	0.4	3.25	3.16667	0	0	0
hsa-miR-4768-5p	13.5	21.2	10	1	2.5	0	32	20	22	0	0	0	26.5	49.3333	24	0	0	0
hsa-miR-4283	0	0	0	0.444444	0.333333	0	0	0	0	0	0	0	0	0	0	0	0	0
hsa-miR-589-5p	1571.42	1768.9	987.75	385.333	220.083	77.5	2174.21	1229.12	775.228	42.75	38.875	75.5	1328.86	2317.56	1164.62	79.2083	59.375	109.458
hsa-miR-16-1-3p	298.786	302.75	270.583	0.285714	1	0	276.214	158.959	79.3333	0	0.75	0.5	313.062	401.249	336.75	0	0	0
hsa-miR-922	1	0	0	0	0	0	0.142857	0	0	0	0	0	0	0	0	0	0	0
hsa-miR-624-3p	9	5.5	9.5	0	0	0	27	10.5	8.5	0	0	0	12	11.6429	23.5	0	0	0
hsa-miR-181c-3p	111.333	58.8333	92	18.5	1.5	1	291.2	157.5	131.5	0	0	2.5	129.833	150.5	141.5	2.5	3.25	0
hsa-miR-517b-3p	89.8333	66.1667	66.5	7	4.5	7.5	39.5	11.3333	17	0	0	0	28	87.5	67.3333	2	0	0
hsa-miR-548o-3p	3137.56	4481.13	1870.34	80.1	60.7719	33.55	5802.78	4337.47	2661.65	5.82051	4.88889	15.3333	2768.13	6901.02	2784.07	18	10.25	36.8333
hsa-miR-181a-2-3p	935.333	1265.5	673.444	19	56	174.1	1322.66	945.111	580.25	12	9	29	823.5	1478.5	884.5	39	24	57
hsa-miR-335-3p	8204.88	7943.15	6408.68	254.25	696.408	106.333	10496.4	6297.51	4007.61	32	25	125	8468.75	15129.7	9524.26	110.711	55.3333	106.5
hsa-miR-4284	0.1	0	0.05	0	0	0	0.1	0.383333	0.05	0	0	0	0.292857	1.3	0.833333	0	0	0
hsa-miR-219-1-3p	493.5	954	292.833	32	41	82.5	842.825	586.976	298.758	18.375	6	20	399.833	841.617	377.583	17	8	15
hsa-miR-5581-5p	0.642857	0	0	0	0	0	2	0	0	0	0	0	1.5	3	1.5	0	0	0
hsa-miR-513a-5p	0	0	0	0	0	0	1	0.666667	0	0	0	0	0	1	0	0	0	0
hsa-miR-27a-5p	12174.9	33367.6	8557.74	378	543.827	51	60683.5	35067.5	15491.6	20	35	69	23701.5	36948.2	22725.2	65	46	114
hsa-miR-1184	0	0	0	0	0	0	0	0	1	0	0	0	0	0	0	0	0	0
hsa-miR-133a	0	2	0	2	4	2	16.3889	12.3333	10.3333	0	0	0	0	3	1	1.66667	0	0
hsa-miR-517-5p	9	9	4	0	2	0	1	0	0	0	0	0	3	9	4	0	0	0
hsa-miR-450a-5p	2874.43	2251.58	1956.1	18	43.6667	1.66667	5243.71	3153.17	2000.82	1	1	11	1999.62	3833.42	2782.75	1	1	9
hsa-miR-4531	0	0	0	0	0	0	0.0526316	0	0	0	0	0	0	0	0	0	0	0
hsa-miR-4635	13.5	17	11	2.1	0.111111	0	18.5	9	12	0	0	0.1	17	20	10	2.2	0	0
hsa-miR-1290	0.184314	0.0588235	0	0.577903	2.48995	3.28883	0.51908	0.37549	0.25	0.117647	1.45241	3.10483	0	0.176471	0	0.0666667	0.633333	0.82006
hsa-miR-3163	1	4	1	0	0	0	6	6	5	0	0	0	5	4	0	0	0	0
hsa-miR-4797-5p	23.3333	28.8333	18.119	0	0.5	0	49.8333	29.3333	19.6429	0	0	0	17	45.75	18.0833	0	0	0
hsa-miR-663a	0	0	0	0	0	0	0	0	0	0.0833333	0	0	0	1	0	0	0	0
hsa-miR-18b-5p	42.3737	36.2247	16.9242	0	0	0	76.5743	47.4091	15.8273	0	0	0	26.7323	62.4714	38.5736	0	0	0
hsa-miR-18a-5p	5728.07	4639.31	3440.37	42	23	8	11174.5	6421.33	3844.83	1	3	3	4911.13	8336.78	6775.99	0	0	0
hsa-miR-1301	1521.11	1144.79	1464.5	150.674	441.768	69.3333	6473.66	3431.86	2773.82	20	34	89	1409.34	2215.26	2474.85	51.5	16.1818	52.5
hsa-miR-9-5p	3515.9	3314.41	2637.51	33.6	44	12	2654.12	1744.12	914.178	3	0	29	4147.22	6129.63	4049.63	1	5	16
hsa-miR-3943	0	0	1	0	0	0	0	0	0	0	0	0	0	0	0	0	0	0
hsa-miR-378c	583.767	619.635	479.245	359.149	189.084	30.9444	1635.3	1070.33	832.208	13.1167	3.95758	20.3648	563.251	1097.37	730.639	19.788	26.708	41.7484
hsa-miR-216a-3p	0	0	0	0	0	0	3.5	0	4	0	0	0	0	0	3	0	0	0
hsa-miR-378j	0	0	0	0	0	0	0.0625	0	0	0	0	0	0.166667	0	0	0	0	0
hsa-miR-7-1-3p	3107.25	1983.45	1998.84	37.5	40	11	5659.61	2949.11	1940.36	3	2	6	2368.21	6145.62	3471.68	0	1	2
hsa-miR-125a-5p	2788.87	1595.79	2636.03	39	161	115	2365.23	1112	931.45	0	0	5	2746.08	3890.77	4441.67	24.3333	13	31
hsa-miR-378e	2.59139	4.35985	1.21405	2.95588	1.36111	1.25	6.66868	5.29226	2.77218	0.25	0.5	0	3.25365	5.32579	3.92531	0	0	0.25
hsa-miR-3617-5p	9.125	7	4	3	1	0	116.375	47	39.5	0	0	0	13	11	13	0	0	0
hsa-miR-374a-5p	4491.37	2308.51	2596.37	152.087	108.283	0.533333	9385.93	5350.92	3382.92	9.18182	7	6.5	3504.85	7560.8	5904.09	0	0	5.5
hsa-miR-6513-3p	21	18	6	0	2	0	44	23	17.0769	0	0	0	16	31	23	0	0	0
hsa-miR-3662	164.056	327.5	131	0	0	0	263	227	62.5	0	0	0	140	275	95	0	0	0
hsa-miR-4524a-5p	0	0	0	0	0	0	1	1	0	0	0	0	0	0	0	0	0	0
hsa-miR-668	0.0769231	0	0	0	0	0	0	1	0	0	0	0	0	1	0	0	0	0
hsa-miR-28-3p	9782.63	11481	7339.82	2590.87	2110.73	1106.96	21383.9	14185.9	8276.8	548.279	258.05	858.817	8501.69	14011.8	8476.79	991.479	559.453	1282.8
hsa-miR-3140-3p	34.5	18.5	15.5	1	2	0	58.5	34.5	14	0	0	0	15.75	39.5	21.3333	0	0	2
hsa-miR-4640-5p	6	5.33333	2	2.5	1.25	0	9	4	2	2	0	0	0	2	9	0	0	0
hsa-miR-3611	74	87.5	50.2	0	0	0	138.2	54.5	38.5	0	0	0	85.6667	111.655	125.083	0	0	0
hsa-miR-10a-5p	6.9815e+06	1.04396e+07	5.84538e+06	525454	452880	684325	1.47023e+07	1.04082e+07	5.43126e+06	127519	86920.6	184028	7.17821e+06	1.19479e+07	7.42055e+06	212696	145561	284418
hsa-miR-6130	5.14773	7.45623	5.70455	1.90422	3.43687	0	15.2159	6.97172	4.31836	0.25	0	0.987277	6.11558	9.74672	5.64232	0	0	0.25
hsa-miR-29b-2-5p	149.5	105	137.5	3	18.5	0	506.643	263.8	216.5	0	0	0	133	275.851	255.5	0	0	0
hsa-miR-3907	2	6	2	0	0	0	0.5	2.5	2	0	0	0	2	3	4.5	0	0	0
hsa-miR-493-3p	0	1	0	0	0	0	1	1	0	0	0	0	1.33333	0	1	0	0	0
hsa-miR-5009-3p	0	0	0	0	0	0	0.5	0	0	0	0	0	0	0	1.33333	0	0	0
hsa-miR-99a-5p	165	544.833	407.333	75.8333	117.091	44.3333	974.458	870.059	475	10	5	15	551.167	761.117	701.311	15.3333	7	11.8333
hsa-miR-196a-5p	7873.27	7509.24	7141.64	2589.71	2843.75	377	19573.7	9695.31	5590.52	175.333	113.733	523.667	8465.35	14448.3	12840	182.667	92.9	210.3
hsa-miR-4727-3p	1	3	2	4	3	0	4	2	0	0	0	0	1	1	1	0	0	3
hsa-miR-4743-5p	4	4	2.5	1	3	3	7	4	3	0	0	3	4	10	3	1	0	0
hsa-miR-561-3p	37.7576	34.5	17.25	0	1	0	45.2667	25.1667	10	0	0	0	22.3333	39.6667	42.4667	0	0	0
hsa-miR-514b-5p	0	0	0	0	0	0	0	1	0	0	0	0	0	0	0	0	0	0
hsa-miR-4723-3p	0	2	0	0	2.14286	0	4.83333	0	2	0	0	0	0.333333	3	3	0	0	0
hsa-miR-3928	251.083	282.333	307.047	99.8333	82.625	47	840.421	405.603	214.167	14	12	29	264.325	462.467	317.258	17.5909	10	27
hsa-miR-638	0	0	0	0	0.5	0	0	0	0	0	0	0	0	0	0	0	0	0
hsa-miR-3607-3p	265.149	409.506	208.84	3	5	1	633.924	382.377	278.367	6	0	2	422.205	669.27	470.521	0	0	1
hsa-miR-3146	7	10.5	7	4	9.25	0	19	10	10	0	0	1	5	15	10	1	3	1
hsa-miR-4707-3p	0	0	0	0	0	0	0	1	1	0	0	0	0	0	0	0	0	0
hsa-miR-4667-3p	5.33333	2	6.14286	0	0	0	6	3	2	0	0	0	4	11.6	4	0	0	0
hsa-miR-1247-5p	291	202	266	88.5	92.2	58	1168.84	440.5	623.2	9	2.5	11.3333	220.5	315	403	15	4.33333	9
hsa-miR-4325	0	1	0	0	0	0	0	0	0	0	0	0	0	0	0	0	0	0
hsa-miR-3613-3p	11.5	7	8.69167	9.53333	12	0	20.3333	15.0667	14.05	0	0	1.5	17.6111	28.25	19.1778	0	0	2
hsa-miR-548a-5p	0.0714286	0	0	0	0	0	5.34091	2	1.25	0	0	0	2	1	1	0	0	0
hsa-miR-5587-3p	37	32	17	0	2	5	45	36	28	0	0	1	18	53	34	0	0	0
hsa-miR-526b-3p	0	0.333333	2	0	0	0	0.333333	0	0.333333	0	0	0	0.5	0	2	0	0	0
hsa-miR-490-3p	0	0	0	0	0	0	1	0	0	0	0	0	0	0	0	0	0	0
hsa-miR-4669	6	14	9.5	4	0	0	35	31	8	0	0	0	22	21.25	14.5	0	0	2
hsa-miR-4726-5p	31.0333	48.25	27.3333	1	6.33333	0	89.3333	73.0833	36.3333	0	0	0	36.1667	74.75	51.8333	2	0	4
hsa-miR-4726-3p	0	1	0	0	1	0	3	0	0	0	0	0	0	0	0	0	0	0
hsa-miR-497-5p	16	7	11	1	1	0	105.833	63.5	37.25	0	0	0	14	34	27.5	0	0	0
hsa-miR-559	11	5.4	8.5	0.5	3	0	69.4197	30.9595	25.55	0	0	0	10.9	20.7193	24.1	0	0	0
hsa-miR-101-3p	64666.2	79089.8	43900.3	411.283	166.083	106.5	154088	104226	47944.6	197.333	58	142.5	76231.9	89387.4	57701.6	65.8333	51	102.333
hsa-miR-4426	0.2	0.8	0	0.366667	0.2	0	0.05	0.2	0.0555556	0	0	0.142857	0.366667	0	0.8	0	0	0.125
hsa-miR-3976	0	0	0	0	0	0.0555556	0	0	0	0.149733	0	0	0	1	0	0	0	0
hsa-miR-3196	0.233333	0.583333	0	0.15	0.666667	0	1.25	0.0833333	0.0833333	0.0833333	0	0.0833333	0.0833333	0.5	0.333333	0	0.25	0
hsa-miR-4644	1.58333	3.575	0	0	0.25	1.02778	7.64216	1.01667	1.25	0	0	0	1.08333	1.16667	0	0	0	0
hsa-miR-6716-5p	0	0	0	0	0	0	0	0	0	0	0	0	0	0	1	0	0	0
hsa-miR-127-5p	0	4	1	0	0	0	1.5	7.5	4.5	0	0	0	2	5.58333	2	0	0	0
hsa-miR-3134	3.61071	1.1	3.11905	0	0	0	3.90952	3.21429	3.30801	0	0	0	2.17668	2.225	2.725	0	0	0
hsa-miR-642b-3p	66.1	39.8333	54.2	3.67619	3	0	165.667	58.5	35.8333	0	0	0	68.6667	69.1111	99.0152	0	0	0
hsa-miR-4663	1	2	1	0	0	0	4	3	0	0	0	0	1	0	2	0	0	0
hsa-miR-193b-3p	453.833	320.111	315.5	752.667	718.667	67	1679.88	972.8	969.976	29.8333	13	41.5	356.643	532	422.476	15	9	16.5
hsa-miR-363-3p	1	0	3	0	0	0	2	1	3	0	0	0	0	1	0	0	0	0
hsa-miR-3620-3p	22	8	20	8	5	0	112.071	72.8333	63.125	0	0	0	16	25.5	31	0	0	0
hsa-miR-589-3p	21	15	12	66	22	7	34	13	19	1	0	0	16	34	33	0	0	1.2
hsa-miR-6722-5p	0	0	0	0	0	0	0	0	0	0	0	0	0	0.333333	0	0	0	0
hsa-miR-5194	1	0	0	0	0	0	2	1	0	0	0	0	1	0	0	0	0	0
hsa-miR-520a-3p	439.725	197.933	250.846	5	1	6	82.0193	48.0667	35.3	0	0	3	148.7	235.25	86.5054	0	1	1
hsa-miR-5683	0	0	0	0	0	0	1	0	0	0	0	0	0.5	0	1	0	0	0
hsa-miR-493-5p	0	0	1	0	0.5	0	0	1	0	0.176471	0	0	1	0	0	0	0	4.25
hsa-miR-629-5p	3205	4323.75	3514.37	2904.28	1923.58	1033.27	10939.6	6544.5	4297.67	314	184	612	3731.59	5853.39	4603.58	202.5	170.5	368.5
hsa-miR-4423-5p	1	1	1	0	0	0	6	0.25	5.5	0	0	0	1.5	1	4	0	0	0
hsa-miR-5590-3p	2	0	0	0	0	0	2	1	1	0	0	0	2	0	1	0	0	0
hsa-miR-5009-5p	18.3	22	21.1	4	1.2	0	38.1	34	18.2	0	1	1	12.25	15	5.11111	0	0	5
hsa-miR-24-3p	309456	236593	156891	38137.5	32485.6	19141.8	462959	234076	199542	1572.27	771.5	3161.73	226172	555653	323011	839.867	681.333	1210
hsa-miR-3934-5p	277.945	419.026	168.034	178.76	129.525	80.1357	445.463	323.986	155.417	27.3333	18.6667	61.0588	252.45	367.091	237.021	22.8333	27.8611	41.75
hsa-miR-6508-5p	0	0	0	0	0	0	0	0	0	0	0	0	0	0	1	0	0	0
hsa-miR-4443	109.41	61.1583	60.238	11.3417	24.9205	2	198.613	89.7244	94.7734	0.333333	0	2.33333	120.427	226.387	156.272	1	3	3.33333
hsa-miR-1238-3p	1	0	0	0	0	0	0	0	0	0	0	0	0	2	1	0	0	0
hsa-miR-2116-3p	85.5	65	78.75	10.2917	21.8333	19	194.667	98.0333	77.1667	0	0	1	91	115.75	75.5333	0	0	1
hsa-miR-22-5p	595.167	598.817	364	150.283	197.5	28	1022.82	504.312	496.646	4	5	20.5	539.458	950.158	697.577	2	1	1
hsa-miR-3190-3p	106.143	158.333	70	40.1667	30.5625	87.5333	211.41	203.667	77.5	14.5	5	20	101.333	144	77.5	10	6	7
hsa-miR-4512	4	3	2	2	0	0	25.9167	10.5611	1.75	0	0	0	9.25	9.89286	7.5	0	0	0
hsa-miR-18b-3p	1.33333	1	0	0	0	0	3.5	1.66667	1.33333	0	0	0	2.5	0.892157	2.5	0	0	0
hsa-miR-182-3p	187.405	174.083	149.542	11	3.2	0	517.667	285.591	149.833	3	1	7	214.833	345.077	343.75	0	0	1
hsa-miR-28-5p	1840.32	2354.98	1111.82	220.538	251.483	55.9652	5525.22	3178.68	2042.32	19	7.53333	33	1832.89	3591.57	2516.81	18	4.83333	11.3333
hsa-miR-625-3p	2066.83	1401.75	1632.04	113.958	87.8333	522.694	5351.03	2700.17	2747.31	93	44.75	69.0333	1958.25	2518.82	2181.67	15.8333	3	4.5
hsa-miR-323a-3p	0	5	5	0	2	0	3	7	5	0	0	0	5	6	7.5	0	0.125	0.0625
hsa-miR-616-5p	19.7193	12.5	10.9333	1	3.75	0	33.4667	26.3048	18.6833	0	0	0	16.0929	34.4	32.8167	0	0	0
hsa-miR-138-5p	45.6667	27.6667	23	0	0	0	215	112.333	80.3333	0	0	0	29.6667	73.3333	60.1667	0	0	0
hsa-miR-3173-3p	2.5	4	2	4	0	0	18	12.0833	7	0	0	2	6	4.5	8.5	0	0	0
hsa-miR-3117-3p	0	1	2	0	0	0	1	0	0	0	0	0	0	0	0	0	0	0
hsa-miR-3065-3p	101.5	73.25	76	26	22	5	126.7	87	62	0	0	0	69.5	143.5	128.333	3	0	0
hsa-miR-519c-3p	0	0	1	1	0	0	0	2	2	0	0	0	1	0	6	0	0	0
hsa-miR-6505-5p	24	17	19	8	1	0	45.5	25	15	0	0	2	30	36	39.5	0	0	0
hsa-miR-365a-5p	686.062	331.476	509.778	14	15.5833	23.25	1719.45	781.15	884	3	4	5	443.533	651	521.833	3	3	8.08333
hsa-miR-129-5p	6	53	36.6667	1	10	10	85.4667	106.833	40.7667	1	0	2	49	80	68.8667	0	2	0
hsa-miR-539-3p	0	0	0	0	0	0	2	2	0	0	0	0	0	0	0	0	0	0
hsa-miR-380-3p	0	0	0	0	0	0	1	1	0	0	0	0	0	0	0	0	0	0
hsa-miR-548n	28.8846	31.5611	34.7845	0.237179	0	0	87.308	46.1739	24.7781	0	0	1	35.5857	54.7914	49.0402	0	0	0
hsa-miR-217	0	0	0	0	0	0	11	4	4	0	0	0	1	1	2	0	0	0
hsa-miR-4733-5p	0	1	2	1	1	0	7	3	2	0	0	0	1	6	1	0	0	0
hsa-miR-892b	0	0	0	0	0	0	0	0	0	0	0	0	0	0	0	0	0.0769231	0
hsa-miR-1288	38.1429	62.1667	26	8	6.5	0	60.8333	51.5	23	1	1	0	17.5	74.7	21	1	0	4
hsa-miR-3136-3p	2	2	0	0	0	0	4	2	0	0	0	0	2	1	4.25	0	0	0
hsa-miR-658	0	0	0	91	51.5909	436.424	0	0	0	0.5	1.5	1.5	0	0	0	38.0909	3.5	4.5
hsa-miR-3942-5p	22	18	15	0	0	0	34	10	9	0	0	0	12	29	16.2	0	0	0
hsa-miR-182-5p	58400	69120.9	65610.1	31330.3	16191	4495.45	183132	103279	59609.9	5551.03	2848.07	8927.23	69743.4	104446	90819.4	2736.06	3831.6	8635.61
hsa-let-7e-3p	41	31	36.3333	1	1	0	18.5	14.5	11	0	0	0	43	64	68	0	2	0
hsa-miR-659-5p	129.5	168	94	6	6	3.5	165.5	120.5	41.5	0	0	1	117	224	84.5	0	1	1
hsa-miR-548ak	0	0	0	0	0	0	0.5	0	0	0	0	0	0	0	0	0	0	0
hsa-miR-3191-5p	106.143	159.333	68	41.1667	30.5625	91.5333	211.41	205.667	78.5	14.5	5	20	102.333	147	82.5	10	6	7
hsa-miR-5588-5p	5.5	4	5.5	4	3	0	18.5	14.3333	11	0	1	1	0	8	4.5	0	0	0
hsa-miR-3180-3p	19.7	22	13.2	28.025	23.4308	7.02857	125.804	59.3	49.5286	7.2	2.4	16.7058	17.4	20.4727	23.45	4.8	1.7	6.6
hsa-miR-3143	48	32	46	19	14	0	146	74.75	61.5	0	0	0	51	81	64	1	0	0
hsa-miR-2467-5p	51	49	47	0	2.25	0	143.5	89	63	0	0	1	49	75	88.3333	0	0	0
hsa-miR-3679-5p	124.462	92.6262	116.56	72.4438	78.6845	48.6909	329.543	133.069	115.586	7.75	11.6667	15.0833	107.675	183.57	162.273	18.5833	2.5	7.75
hsa-miR-4494	0	0	0	0	0	0	0	0	0	0	0	2	0	1	0	0	0	0
hsa-miR-411-3p	0	0	0	0	0	0	0	1	1	0	0	0	0	0	2	0	0	0
hsa-miR-514a-3p	18	9	8	0	0	0	367.962	192.743	133.231	4	0	3	15	34	13	0	0	0
hsa-miR-4714-3p	0	0	0	0	0	0	2	0	1	0	0	0	0	0	0	0	0	0
hsa-miR-4672	2	4	5	1	1	0	10.6667	2	2.5	0	0	0	6.5	12.6667	9.5	0	0	0
hsa-miR-4753-3p	10	2	2	0	2	0	11.6111	6.5	5.7	0.125	0	0	2.5	10	5	0	0	0
hsa-miR-664b-3p	20.1111	13.5	16.3333	1.5	0.5	0	53.15	23.5278	16.4583	0	0	0	27.6167	31.1667	33.8333	0	0	0.5
hsa-miR-15b-3p	1938.5	1238	1698.06	364.208	541.896	65	4576.65	2725.71	2057.18	28	15	38	1875.52	3263.14	3526.81	10.5	9	11
hsa-miR-3925-5p	3	2	2	2	1	0	3.33333	2	3	0	0	0	1	2	3	0	0	0
hsa-miR-4697-3p	1	0	0	0	0	0	1	0	2	0	0	0	0	0	0	0	0	0
hsa-miR-196b-5p	13768	10015	11667.4	1083.75	1488.67	12.0667	38824.3	18965.7	11808.4	73.3333	23.8333	148.333	12469.2	22665.3	20062.5	29.6667	46.5	86.6667
hsa-miR-181b-5p	23267	15132.1	18598.6	4934.82	4076.06	360.976	24207.4	13113.3	9612.1	324.067	144.333	462.667	19977.8	45359.3	32512.8	274.5	106	327.167
hsa-miR-132-5p	3469.73	1786.27	2060.33	27	45	40.5	9357.05	5146.45	5343.79	0	2	7	3161.58	8414.74	4679.14	4	0	1
hsa-miR-4458	1.51667	0.773611	0.433333	0	0	0	5.57361	1.61667	2.43333	0	0	0	1.26667	3.64444	4.2625	0	0	0
hsa-miR-4645-3p	6	9	4	1	0	0	12	15	11	0	0	0	7	18	9.33333	0	0	0
hsa-miR-3934-3p	4	2	0	1	0	0	5	4.5	0.5	0	0	0	6.5	7.5	5	0	0	0
hsa-miR-6509-5p	7	3.5	5.5	0.5	0.25	0	19.3333	7.33333	4.33333	0	0	0	7	10.5	7.5	3	0	0
hsa-miR-4746-3p	2	1	0	0	0	0	5	0	1	0	0	0	2	4	1	0	0	0
hsa-miR-409-5p	0	0	1	0	0	0	1	3	2	0	0	0	1	2.5	0	0	0	0
hsa-miR-5787	0	0	0	0.0714286	0	0	0	0	0	0	0	0	0	0	0	0	0	0
hsa-miR-508-5p	0	1	0	0	0	0	7	9	10	0	0	0	1	1	0	0	0	0
hsa-miR-1909-3p	9	6	4	0	0	0	15.5	9.53333	3	0	0	0	7	11	6.33333	0	0	0
hsa-miR-30c-5p	15537.2	11087.8	13255.2	2710.15	1629.12	242	42859.2	22315.8	17504.4	199	90	217.2	15774.6	28659.7	25510.1	169.625	121	196
hsa-miR-3909	1020.34	1236.67	748.593	33.5	45.2	26	2594.87	1514.53	1059.58	3	2	5	860.25	1923.65	1045.43	3.5	0	1.5
hsa-miR-4504	231.125	360	142.333	12	3	9	283.5	248.583	67	2	2	1	203	336.125	128.567	1	2	3
hsa-miR-455-5p	283	186	187	9	4	0	1397.5	790.75	563.5	2	1	9	310	534	348.833	0	0.125	0
hsa-miR-4761-3p	17	12	9	1	1	0	50	23	15.5	0	0	0	11	25	22	0	0	0
hsa-miR-203a	38195.5	28639	24771.5	1786.94	1762.8	1465.7	61712.8	35001.8	23038.4	883.175	461.089	1029.38	39774.2	61650.4	36597.2	236.566	260.375	459.3
hsa-miR-195-3p	107	110.333	87.5	2	4	0	445.25	410.667	152.5	0	1	3	121.5	188.5	111.5	1	2	5
hsa-miR-4417	0	0	0	0	0	0	0	0	0.125	0	0	0	0	0	0	0	0	0
hsa-miR-5589-3p	0	0	0	0	0	0	2	1	0	0	0	0	0	0	0	0	0	0
hsa-miR-4469	0	3	0	0	0	0	2	0	0	0	0	0	0	1	1	0	0	0
hsa-miR-624-5p	138	91	79.7	6	1	0	279.229	184.333	101.5	0	0	0	113	219.5	173.75	0.5	0	0
hsa-miR-548ap-5p	0	0.0714286	0.142857	0	0	0	0.142857	0.142857	0.142857	0	0	0	0	0.214286	0.142857	0	0	0
hsa-miR-4747-3p	17	13	9	0	0	0	20	12	7	0	0	0	14	16	16	0	0	0
hsa-miR-193b-5p	55	97.2	79.5	22	30.5	11	382.833	231	137.75	1	2	9	77.6667	112	98.5	10	2	2
hsa-miR-1304-5p	148.256	105.408	91.885	13.1088	13.0441	3.07143	280.185	140.849	100.217	0.255556	0.142857	0.911111	119.098	276.7	160.707	0.766667	0.0833333	0.636111
hsa-miR-216b	0	0	2	0	2	1	26	11.25	12	0	0	0	0	3	4	0	0	0
hsa-miR-1295a	1	1	1	2	0	0	18	8	4	0	0	0	1	12	6	0	0	0
hsa-miR-550a-5p	384.287	331.228	312.333	6.66667	5.86667	23.6667	940.84	498.372	300.884	2	1	5.66667	347.467	682.033	473.034	1.66667	0	0.333333
hsa-miR-6510-5p	0	0.333333	0	0	0	0	1	0	0	0	0	0	0	0	0	0	0	0
hsa-miR-1268b	13.3293	8.40385	8.32202	0.333333	2.16667	0	8.64344	3.40828	0.888034	0	0	1	8.62968	14.8235	7.64985	0	0	0
hsa-miR-3605-5p	16	20.1429	19.5	61.0833	41	25	37	18	13	10	6	6	21	54.5833	26.1429	13	5	14
hsa-miR-376b-5p	0	0	0	0	0	0	0	0	0.5	0	0	0	0	0.5	1	0	0	0
hsa-miR-4637	3	0	0	0	0	0	3	3	0	0	0	0	2	3	2	0	0	0
hsa-miR-506-5p	0	0	1	0	0	0	4	6	1	0	0	0	2	0	0	0	0	0
hsa-miR-6129	2.78571	2.27381	3.19048	2.08333	3.06548	0.142857	9.79048	5.17262	3.21548	1	0	0.333333	4.04048	4.30357	4.86905	0	0.142857	0
hsa-miR-548p	1.05758	1.80952	1.72619	0	0	0	5.13135	3	2.03333	0	0	0	1.6	2.09549	1.92063	0	0	0
hsa-miR-30b-3p	179.833	127.611	166.333	8	13	0	481.722	268.553	192.556	0	1	0	187.111	344.917	343.5	0	1	2
hsa-miR-4470	63	65	46.5	8	7.33333	17	182.5	139	93.75	0	0	7	52	130	85.5	1.25	1	0
hsa-miR-4687-3p	21.4444	9.75	16.4167	2	13.25	7	57.3333	20.8333	22.5	2	0	1.16667	15.1667	18.3333	19.5	0	1	1.22222
hsa-miR-3137	10	2.5	3	3.5	7	0	21.6667	8	3	0	0	2	8	19.5	9.72222	0	0	0
hsa-miR-615-3p	473.261	621.301	285.792	26	111.292	41.3333	2376.29	1519.89	1527.28	5	0	13	353.862	765.906	597.324	20.3333	13	8
hsa-miR-1185-2-3p	0	0	0	0	0	0	0	0.5	0	0	0	0	0	0	0	0	0	0
hsa-miR-524-5p	5	2	1	1	1	0	1.2	0	1	0	0	0	1	2	1	0	0	0
hsa-miR-4794	1	1	2	0	0	0	7	7	4	0	0	1	4	5	3	0	0	0
hsa-miR-3685	43	22	32	2.5	2	0	60	41	25	0	0	0	25	38	40	0	0	1
hsa-miR-4787-5p	0	0	0	0	0	0	3.5	3	3	0	0	0	1	0	0	0	0	0
hsa-miR-449c-3p	0	0	0	0	0	0	0	1	3	0	0	0	3	0	0	0	0	0
hsa-miR-5581-3p	38	29.5	16.8333	2	4	0	55.5	26	21	0	0	0	22	38.5	38	0	0	3
hsa-miR-516a-5p	3.5	5	4	2	0	0	1	0	1	0	0	0	8	8.66667	9	0	0	0
hsa-miR-10b-3p	80	50.5333	66.5	1.2	2.33333	11	478.283	259.575	244.4	5	3	9	93.1167	232.125	199.416	0	0	0
hsa-miR-29b-3p	5795.45	4850.72	5251.56	674.048	218.633	9.36364	10174.5	6161.5	3091.07	15.3727	6.33333	17.5606	6949.83	11790.9	9799	0.363636	6.18182	5.47619
hsa-miR-4713-3p	4	6	2.5	3	2	0	17	5	5	0	0	0	7.64286	8	9.5	0	0	0
hsa-miR-454-5p	263.5	292	307	36	83	25	706.667	386.333	252.5	5	7.25	13	277.333	493	400.033	17	8	0
hsa-miR-4659b-3p	2	0	0.5	2.5	0.7	0	6	2.83333	2	0	0	0	0.5	1.5	2.5	0	0	0
hsa-miR-6513-5p	2	1	1	2.11111	5	0	7	4	3	0.0555556	0	0.222222	3	3	6	0	0	0.111111
hsa-miR-548ay-3p	87	99	101.617	4	13	7.09091	247.617	128.833	89.6667	0	0	0	101.208	180.783	154.25	2	0	0
hsa-miR-5579-3p	0	1	0	0	0	0	0	1	0	0	0	0	0	0	0	0	0	0
hsa-miR-4451	0	0	0	0	0	0	0	0	0	0	0	0	0.0769231	0	0	0	0	0
hsa-miR-431-5p	0	1	0	0	0	0	3	3	0	0	0	0.666667	0	0	1	0	0	0
hsa-miR-5100	181.823	244.202	111.958	0.735714	10.6	0	300.876	167.86	115.923	0	0	0.5	147.901	271.947	226.835	1.4	1	1.2
hsa-miR-200b-3p	529257	592457	418748	21522.9	46095.5	14880.7	1.39283e+06	850022	522652	5725.85	4133	16839.1	549975	900194	619689	6393.88	3828.67	10173.9
hsa-miR-6499-5p	0	0	0	0	0	0	2	0	0	0	0	0	0	0	0	0	0	0
hsa-miR-92a-3p	246435	197370	273639	32443.7	25191.8	25292.6	653799	344659	255951	2226.68	1430.53	4885.83	289118	422739	415546	7203.05	4848.98	7955.95
hsa-miR-1305	92	62	53	0	0	0	125.244	61	25.5333	0	0	0	68.75	135.25	100.533	0	0	0
hsa-miR-598	0	1	0	0	0.333333	0	2	2	0	0	0	0	1	2	2	0	0	0
hsa-miR-937-3p	126.833	167.125	92.8333	8	22.5	8	275.533	185.5	86.2526	0	0	0	114.5	226.5	160.5	2.5	2	3
hsa-miR-4763-3p	5	7	6	0	0	0	10.8333	7	2.5	0	0	0	2	2.5	1.25	0	0	0
hsa-miR-6510-3p	39.9167	33.3333	36.8333	10	7.33333	5	130.25	96.8333	59	0	0	0	55	87.6667	43.3333	0	0	0
hsa-miR-660-5p	2363.5	1565.58	2416.5	460.25	167	60	9888.42	5484.11	4015.53	30	6	19	2646.83	4253.58	4054	7	5	18
hsa-miR-548i	16.4722	8.25	14.8889	1.33333	1.33333	0	24.9837	18.4544	15.5716	0.222222	0	0.222222	10.6928	23.7908	18.4575	0	0	0
hsa-miR-3660	166.583	206.31	132.583	9.5	18.5	10.3333	388.5	213.75	110.667	3	0	9	150.833	325.833	189.458	5	3	7
hsa-miR-550b-3p	107.621	141.828	78.3333	1.66667	2.86667	19.6667	307.007	168.039	71.8843	0	1	5.66667	109.467	216.7	128.701	1.66667	0	0.333333
hsa-miR-520a-5p	5.5	7	1	0	2	0	4	0	1	0	0	0	1	9.125	4	0	0	0
hsa-miR-3180	6.33333	10.6667	4	16.6833	13.6205	4.68571	38.1167	20.7333	11.8857	4.8	1.6	11.1372	4.4	6.44848	7.23333	3.2	1.13333	4.4
hsa-miR-421	1778.55	1277.33	1632.37	363.667	346.417	45.3333	5013.61	2753.58	1914.5	14	19	17	1586.2	2524.83	2878.07	15	12.6667	14
hsa-miR-519e-3p	1	0	0	0	0	0	0	0	0	0	0	0	0	0.333333	1	0	0	0
hsa-miR-151a-5p	671.846	638.355	372.198	762.127	425.982	10.3374	1451.95	909.962	652.698	5.09418	4.61765	41.1884	514.199	1142.04	836.07	6.44848	3.05882	32.4271
hsa-miR-378g	26.5735	40.7711	20.323	8.38611	6.49425	4.50556	68.5459	37.5998	24.4006	0.569444	0.566667	2	26.2535	47.3965	27.8996	0.25	0.972222	2.93056
hsa-miR-29a-5p	303.367	195.333	139.7	13	3	0	370.358	216.197	168.583	1	0	0	256.333	431.555	256.209	0	0	0
hsa-miR-521	1	0	0	0.4	0	0	0	0	0	0	0	0	0	0	0	0	0	0
hsa-miR-151a-3p	123453	159737	72615	5521.2	8087.53	2445.66	202761	146155	72070.3	2430.74	1771.33	4876.53	94457.3	183760	76081.2	3054.97	2127.91	6454.19
hsa-miR-3155b	105.333	125.176	63.5	10	6.45	6.5	159.5	103.375	61.3333	0	0	0	80.3333	183.583	112.458	2	0	2
hsa-miR-3941	8	10	4	0	1	0	27.3333	11	8	0	0	0	9	15.5	4	0	0	0
hsa-miR-200c-5p	993.5	734.5	649.5	18	33.5	0	1868.5	1091.17	923.333	1	2	0	988.083	2364.92	1526.56	2	0	0
hsa-miR-646	0	0	0	0	0	0	0	0	0.0625	0	0	0	0	0	0	0	0	0
hsa-miR-329	0	0	0	0	1	0	1.18182	1	0	0	0	0	0	1	2	0	0	0
hsa-miR-518c-5p	13.1667	7	3	0	0	0	7	1	5	0	0	0	2	15	4	0	0	0
hsa-miR-153	8	1	7	2	0	0	23	13.6667	8	0	0	0	6	10	14	0	0	0
hsa-miR-26b-3p	332.5	215.559	264.667	9	11	0	657.624	375.25	254.95	0	1	3	318.792	537.833	470.833	2	0	2
hsa-miR-4788	1	0.5	0.5	0	0	0	0	1	0.5	0	0	0	0.5	0.5	0	0	0	0
hsa-miR-590-5p	62	24	34	2	0	0	97	66.5	30.5	0	0	0	66	90	55.5	0	0	0
hsa-miR-6715b-5p	0	0	1	0	0	0	0	0	1	0	0	0	0	0	1	0	0	0
hsa-miR-523-5p	4.33333	3.66667	3.2	1.5	0.833333	0	1.66667	1.47619	1.30952	0	0	0	1	2.16667	2.30952	0	0	0
hsa-miR-4483	0	0.0909091	0	0	0	0	0.233766	0.233766	0	0	0	0	0	0.285714	0	0	0	0
hsa-miR-5192	0	0	0	0	1	0	0	0	0	0	0	0	0	2	0	0	0	0
hsa-miR-4796-3p	3	2	4	1	1	0	2	1	0	0	0	0	5	6	2	0	0.0769231	0
hsa-miR-3657	4	4	2	0	1	0	6.5	3	3	0	0	0	3	3	3.03333	0	0	0
hsa-miR-582-3p	15029.9	16779.6	9205.7	59.5	30	21	40312.6	26629.5	12280.9	64	19	56	15121.2	26555.2	11239.5	9	26	19
hsa-miR-148a-3p	693716	602789	505319	22607.6	7005.83	6433.95	1.62839e+06	957634	538602	35774.4	12827.7	32725.3	596066	1.18482e+06	553990	5678.92	8752.59	13486
hsa-miR-4691-5p	1	0	0	0	0	0	4	1	0	0	0	0	0	0	0	0	0	0
hsa-miR-106b-3p	12747.5	12597.4	13302.7	1105.59	1298.33	238.5	28952.9	15422	10863.9	343.701	249.809	696.225	13832.4	21370.6	16385.9	431.386	355.5	1018.87
hsa-miR-4482-3p	12.5333	13.5	10	2	8	0	16	22	11	0	0	0	8.5	16	24	0	6	0
hsa-miR-3148	0	3	2	0.5	0	0	17.5	4.5	9	0	0	0	3	3	2	0	0	0
hsa-miR-2113	1	0	0	0	0	0	0	2	0	0	0	0	0.5	0	0	0	0	0
hsa-miR-570-3p	39.5	36	18.6667	1	0	0	71.6667	61.7	30.8333	0	0	0	24.7	64	44	0	0	0
hsa-miR-4762-3p	4	3	4	1	0	0	9.33333	2.5	4	0	2	0	3.5	4	1	0	0	0
hsa-miR-4324	0	0	0	0	0.5	0	0	0	0	0	0	0	0	0	0	0	0	0
hsa-miR-4757-5p	0	1	0	2	0	0	3	0	1	0	0	0	0	2	0	0	0	0
hsa-miR-3135a	15.8333	25	13.2	0	0	0	41.5	17.3333	15	0	0	0	31.3333	21	19	0	0	0
hsa-miR-129-2-3p	3	14.1667	2.5	0	0	0	20.0833	13.3333	7	0	0	0	8.83333	10.5	8.5	0	0	0
hsa-miR-622	0	0.5	0	0	1.33333	0	0	0	0	0	0	0	0.333333	0	1	0	0	0
hsa-miR-324-3p	126.102	95.5079	116.682	84.572	71.5556	14.1667	503.499	244.478	233.271	4.53333	4	5.66667	153.085	171.979	229.776	5.7	2.33333	6.44444
hsa-miR-3177-5p	16	17	10	2	1	0	19	14	15	0	0	0	4	22	16	0	0	0
hsa-miR-4779	0	0	0	0	0	0	0	1	0	0	0	0	0	0	0	0	0	0
hsa-miR-4492	0.333333	0	0	2.46581	6.79915	0	0.24359	0	0	2.16667	0.0769231	3.33333	0	0.5	0	1	0.111111	0
hsa-miR-581	97	116.333	76	4	3	14	218.2	160.5	67	0	0	3	73.5	198.333	79	2	0	1
hsa-miR-5001-3p	397.062	285.056	404.643	30.125	52.5	2	1245.15	652.1	613.367	4	0	3	392.429	693.667	791.533	5	0	0
hsa-miR-3145-3p	9	5	10	1	0	0	55.5	16.5	8	0	0	0	16	24	23.5	0	0	0
hsa-miR-506-3p	2	1	3	0	0	0	46	13.5	14.25	5	0	1	1	9	2	0	0	0
hsa-miR-552	9	5	2	0	1	0	585.158	409.121	206.708	12	4.5	6	16	13	2	0	0	0
hsa-miR-31-3p	91	55	83	0	0	0	194	151	56.5	0	0	0	95	154.5	103.333	1	0	0
hsa-miR-4670-5p	1	0.5	0.5	0	0	0	0	0.5	0	0	0	0	2.5	1.5	0	0	0	0
hsa-miR-98-5p	19573.9	14422.2	20297.7	839.321	1117.15	117.65	52687.6	26616.5	14805.2	73.1167	55.5936	233.097	19982.2	37712.2	29628.4	23.1659	10.25	51.5722
hsa-miR-676-5p	8	12	6	0	0	0	45.5	15.7	16	0	0	0.111111	12	15.0625	15	0	0	0
hsa-miR-2115-3p	2.5	2	2	0	2	0	13	7	2	0	0	2	4	5	4	0	0	0
hsa-miR-29a-3p	145977	119200	103705	48186.8	19424.8	1765.84	291212	172581	119966	1128.95	380.393	1587.05	148043	285306	236823	470.828	372.812	982.848
hsa-miR-362-5p	2183	1489	1734.5	99	169	12	7442.17	4628.58	3294.33	1	3	6	1917	4159.8	3032	5	2	4
hsa-miR-4460	0	1	0	0	0	0	0	0	2	0	0	0	0	0	1	0	0	0
hsa-miR-1286	40	31.8333	28.5	8.33333	0	0	73.5333	52.3333	15	1	0	0	16.5	71.2333	42.5	0	0	4
hsa-miR-505-3p	583.75	329.444	565.611	181.132	164	0	2203.1	1125.44	870.567	18.2	11.5	34	648.143	1181.11	1093.58	0	0	3
hsa-miR-15a-5p	979.633	790.028	716.15	266.683	19.5833	0	1857.48	1096.87	650.017	1	0	2	949.533	1709.41	1451.46	0	0	1
hsa-miR-484	13067.3	9553.87	11301.3	799.409	1282.61	435.458	31989.9	17477.4	16833.7	41.4333	22	104	13290.6	20741.1	25155.2	84.5	44	69.5
hsa-miR-382-3p	0	2	1	0	0	0	5.5	4	1	0	0	0	6.5	2	5	0	0	0
hsa-miR-642b-5p	56.1	50	53	23.4017	15.1429	45.4	105.333	61	32.1667	0	1	2	58	95.9444	62.8485	11	0	3
hsa-miR-550a-3-5p	24.9769	27.9142	22.9936	1.33333	1.1	5.33333	74.7536	54.3361	32.3588	0	0	1.33333	38.8333	63.25	52.4262	0	0	0
hsa-miR-3622b-5p	0	0	0	0	0	0	0	1	0	0	0	0	0	0	0	0	0	0
hsa-miR-4701-5p	0	0	1	0	0	0	0	0	0	0	0	0	0	0	0	0	0	0
hsa-miR-147a	2.125	2.83333	1.45833	0	0	0	7.02662	2.875	0.375	0	0	0	1.1	3.13258	2.3	0	0	0
hsa-miR-432-5p	0	0	0	0	0	0	0	2	1	0	0	0	0	1	0	0	0	0
hsa-miR-204-3p	6	2	3	0	2	7	13	7.33333	9.33333	0	1	5	8.5	3.33333	7	0	0	0
hsa-miR-124-3p	1	145.05	110.75	0	0	0	211.673	226.849	136.479	0	0	0	181.478	176.179	168.062	0	0	0
hsa-miR-3663-3p	1	0	0	0.125	0	0	1	1	0	0	0	0	1	0	0	0	0	0
hsa-miR-3923	0	0	0	0	0	0	2	0	0	0	0	0	0	0	0	0	0	0
hsa-miR-4422	1	0	0	0	0	0	4	0	1	0	0	0	3	1	1	0	0	0
hsa-miR-5093	2	0	0	1	1	0	1	1	0	0	0	0	2	3	0	0	0	0
hsa-miR-96-3p	10	26	22	0	0	0	57	17	19	0	0	0	26	47.5	38	0	0	0
hsa-miR-1913	0	1	0	0	0	0	1.5	0	0.5	0	0	0	0	0	1	0	0	0
hsa-miR-4529-5p	0	0	0	0	0	0	0.5	0	0	0	0	0	0	0	0	0	0	0
hsa-miR-4535	0	0	0.0555556	0	0	0	0	0	0	0	0	0	0	0	0	0	0	0
hsa-miR-3184-5p	61621.7	49312.8	62823.3	12936.3	17771.6	33763.3	169328	84126.3	74720.8	2709.37	1804.31	4963.58	63624.8	90313.9	93102.6	2719.67	818.45	1212.39
hsa-miR-4676-5p	7	6	4	0.0666667	0	0	14.5	5	1	0	0	0	2	5	5	0	0	0
hsa-miR-320d	51.2851	52.4225	41.2577	1460.94	1481.53	637.935	192.923	93.8361	54.72	231.101	147.518	507.713	53.9543	107.03	81.4063	252.065	22.0535	65.6851
hsa-miR-526b-5p	36.1667	15.5	18	3	6	0	9	3	2	0	0	0	11	17	21.25	0	1	0
hsa-miR-3620-5p	2.05882	7.24583	1.26667	0	1.06667	0.266667	1.8098	6.1	0.166667	0	0	0	1	1.57647	1	0	0	0
hsa-miR-3926	0	0	0	0	0	0	1	0	1	0	0	0	0	0	0	0	0	0
hsa-miR-4688	0	1	0	0	1	0	2.625	2	2	0	0	0	5	1	2	0	0	0
hsa-miR-222-3p	9739.5	5971.12	7830.24	6369.59	9107.85	303.2	13445.8	7485.34	7612.25	131.893	106	309.01	9549.22	18140.2	19422.4	266.583	142.483	231.276
hsa-miR-345-3p	8.5	3	7	1	1	0	13	5	8	0	0	1	2	5	4	1	0	0
hsa-miR-3176	163.6	198.658	137.2	41.2	21.1	7	426.783	265.373	108.359	0	0	2	137.567	284.497	168.367	1.2	0	6.2605
hsa-miR-1178-3p	3	7	6	0	1	0	5	5	2	0	0	0	6	8	3	0	0	0
hsa-miR-4796-5p	2	7	0	0	1	0	0.5	0	0	0	0	0	5	8	6	0	0	0
hsa-miR-502-5p	22	25	19	6	3	0	84	53	40.5	0	0	0	28	52	43	0	0	0
hsa-miR-5187-3p	0.5	1	0.5	0	0.25	0	0.5	1.5	0.5	0	0	0	0.142857	0	1.5	0	0	0
hsa-miR-1297	0.25	0	0.125	0.25	0	0	0.625	0.5	0.0526316	0	0	0	0.25	0	0.177632	0	0	0
hsa-miR-3944-5p	12.5	10	11	1	6	0	37	9	14	0	0	0	7	18.3333	23	0	0	1
hsa-miR-664a-3p	162	107	129	7	19	0	461.167	227	164	2	0	4	212	311.81	278.333	3	6	3
hsa-miR-548at-5p	4	5	3	0	0	0	24.0556	7.14286	1.70168	0	0	0	2.5	1	6.07143	0	0	0
hsa-miR-143-5p	0	0	1	0	0	0	1	1	0	0	0	0	0	1	1	0	0	0
hsa-miR-1208	0.0833333	0	0	0.0833333	0.0555556	0	0	0	0.0555556	0	0	0.0555556	0	0.5	0.0909091	0.0555556	0.111111	0.166667
hsa-miR-215	3135.32	2780.01	1978.1	310.067	131.411	224.639	8827.37	5679.66	2802.37	91.8333	10.0333	97.5833	3149.57	5074.81	3276.61	16.8333	25.25	43.0833
hsa-miR-4522	25	18	23	0	0	0	63.2	35.2429	22	2	0	0	17.2	40.5	19	0	0	0
hsa-miR-4753-5p	5.83333	4	3	2	0	10	10.5	5	4	0	0	0	4	5.45	4	0	0	0
hsa-miR-34c-3p	0	1	0	0	0.125	0	0	0	0	0	0	0	0	0	0	0	0	0
hsa-miR-503-5p	867	786.4	714.271	46.5	42.5769	47.3333	1767.58	1026.1	593.758	8.5	2	27	691.692	1046.54	949.056	18	15.1	18
hsa-miR-1234-3p	3	3	3	0	2	0	5	2	4	0	0	1	3	9	6	0	0	0
hsa-miR-19a-5p	0	1	2	0	0	0	4	3	1	0	0	0	4	8	5	0	0	0
hsa-miR-1253	0	0	0	0	0	0	1	0	0	0	0	0	0	3	0	0.125	0	0.125
hsa-miR-4764-5p	5.5	8.26667	4	1	0	0	10	11	5	0	0	0	7	3	13.3333	0	3	0
hsa-miR-1233-3p	0.105263	0.105263	0.205263	0.105263	0.105263	0	0.505263	0.205263	0.310526	0	0	0	0.205263	0.210526	0.105263	0	0	0
hsa-miR-193a-3p	18.8333	8	6	12.2	1.53333	0	55.5833	44.4917	20.5625	1	0	0	7.39286	29.1111	18	0	0	0
hsa-miR-6501-3p	1	0	0	0	0.5	0	0	0.5	0	0	0	0	0	0	0	0	0	0
hsa-miR-1260b	410.916	315.056	333.379	5.62297	12.9154	1.66639	913.375	396.213	311.867	1.72941	0.781513	0.718021	422.105	662.123	623.455	2.24874	1.69412	3.06424
hsa-miR-185-3p	492.424	439.717	336.06	64.7389	82.6838	10.1111	910.925	543.783	396.76	7.05	5.05	7.33333	403.875	732.706	515.074	10.8	22.6111	30
hsa-miR-4529-3p	0	0	0	0	0	0	0.5	0	0	0	0	0	0	0	0	0	0	0
hsa-miR-1273d	7.40873	5.15238	4.8	0	1.06667	0	13.1791	7.42738	3.88957	0	0	0	4.31731	8.60317	5.70794	0	0	0.629167
hsa-miR-1277-3p	9.03333	6.16667	4.03333	0	0	0	26.7	9.5	5	0	0	0	15.5	11.1667	13.5	0	0	0
hsa-miR-1538	8	6	7	2	1	0	12	7	3	0	0	0	6	9	3.5	0	0	0
hsa-miR-3116	63.0524	71.4094	79.4524	0	1.83333	0	135.738	78.0357	58.0857	0	0	0	74.5286	126.794	92.8333	0	0	0
hsa-miR-30c-2-3p	2	3	4	0	2	0	10.5833	14.6667	8.83333	0	0	0	2	5.58333	7.16667	0	0	1
hsa-miR-1243	6	2	4	2	0	0	16.5909	14	3	0	0	0	6	10	11	0	0	0
hsa-miR-4738-5p	0	0	0	0	0	0	0	0	1	0	0	0	0	0	0	0	0	0
hsa-miR-30e-3p	5855.5	6069.18	4876.86	549.5	474	45.5	14159.8	8534.76	5157.53	203.062	105	364.5	4795.38	9890.54	6311.14	99	117.5	428.333
hsa-miR-149-5p	5340.21	3420.6	3528.47	266.676	251.917	93.1667	8984.6	4588.6	4208.89	17.8333	6	20.3333	3910.07	6308.77	5735.62	41.5	28	50.5
hsa-miR-4646-5p	0	0	0	0	0	0	1	1	0	0	0	0	0	0	0	0	0	0
hsa-miR-3198	4	9	3	1	3	8	26.4	8	9	0	0	0	3	8	5.4	0	2	0
hsa-miR-221-3p	89062.7	60274.3	90557.4	34433.6	25884.5	523	156913	76305	59124.8	627.587	503.226	1566.89	84977.8	139198	137170	935.393	685.233	1370.25
hsa-miR-4712-3p	0	0	0	0	0	0	0	0	0	0	0	0	0	0	2	0	0	0
hsa-miR-3139	23	28	31	1	1	0	93.5	58.5	55.5	0	0	0	17	42	45	0	0	0
hsa-miR-4999-5p	25.8333	11	12	0	1	0	38.8333	20.25	9.5	0	0	0	25	54	33.6667	0	6	0
hsa-miR-449b-5p	8.5	3.5	7.5	3.5	4.5	0	25	18.5	12	0	0	0	7	12.5	15	0	0	0
hsa-miR-4636	43.3333	35.5	19	0	1	0	225.125	111	96	0	0	0	41.5	86	61	0	0	0
hsa-miR-5188	6	5	2	2	1	0	12	3	9	0	0	0	3	5.5	5	0	0	0
hsa-miR-652-3p	3592.75	2271.83	3166.83	1373.18	891.5	76	9519.24	4938.39	3719.21	53.5	17	62.5	3290.67	5663.87	5089.12	28	12	44
hsa-miR-3656	0.458333	0.5	0.267857	3.72738	2.34524	0	0.640152	0.375	0	0	0	0	1.02543	1.32738	1.77543	0	0	0
hsa-miR-498	3	3	2	4	0	0	2	2	2	0	0	0	1	5	6	0	0	0
hsa-miR-4734	7.66667	8	9	0	2	0	18	15.5	14.5	0	0	1	8	17.5	6	1	0	1
hsa-miR-1469	0	0	0	0	0	0.2	0	0	0	0	0	0	0	0	0	0	0	0
hsa-miR-1262	105.333	110.417	122.583	34.5333	44.1667	42	197.619	129.343	64.6667	12	6.33333	28	102.5	196.667	108.533	14	9	12
hsa-miR-2115-5p	0	0	0	0	0	0	0.0833333	0	1	0	0	0	0	0	0	0	0	0
hsa-miR-4662a-5p	1	0	2	0	0	0	4	4	2	0	0	0	1	3.5	0	0	0	0
hsa-miR-4795-3p	1.5	3.5	0.5	0.5	0	0	4	4	4	0	0	0	2	5.5	4	0	0	0
hsa-miR-3676-3p	14	4.83333	5.5	0	0	0	26.6429	3.5	15.3778	0	0	0	7.58333	18.3625	19.6667	0	0	0
hsa-miR-29c-5p	151.833	136.875	116	7	6	0	382.577	197.6	140	2	3	1	143	321.528	188.5	0	0	0
hsa-miR-374b-5p	9373	6633.78	6987.79	452.476	498.783	36.3333	21447.3	10916.5	7371.25	88.125	23	59	8180.9	12956.3	11865.9	33	27	65
hsa-miR-30c-1-3p	125.833	135	135.333	6	10	0	341.75	198	112	1	1	3.5	149.726	249.167	222.333	1	0	0.25
hsa-miR-616-3p	4.61111	3	1.5	2	3	0	15.1667	7.66667	4	1.5	0	0	1.83333	8.33333	8	1.5	0	0
hsa-miR-212-3p	237.2	129.5	183	53	30	12.5	553	245.333	198.333	2	4	0	165	366.667	228.5	2	1	1
hsa-miR-1224-5p	11	6.4	2	1	1	12.6742	34.3333	17.4167	15.3333	6	6.43333	12.5833	6	2.5	7.33333	2	3	2
hsa-miR-561-5p	346.359	491.417	224.25	11.1667	7.08333	1	502.368	375.75	203	1.08333	1	0	265.333	642.667	383.81	0	5	0
hsa-miR-4772-5p	0	0	0	0	0	0	1	1	3	0	0	0	0	0	0	0	0	0
hsa-miR-3158-3p	490.786	762.902	358.692	51	43	25.1818	1224.57	628.945	420.083	11.5714	8	20	518.667	742.367	416.815	13.5	13.6667	21
hsa-miR-4786-3p	2	1	0	0	0	0	8	1	0	0	0	0	1	5	0	0	0	0
hsa-miR-23b-5p	245.333	161.367	271.533	0	6	8	571.333	315.111	239.667	1	0	2	239.111	295.811	286.833	1	0	0
hsa-miR-4427	2	2	2	0	0	0	0	2	3	0	0	0	1	1	0	0	0	0
hsa-miR-3913-5p	62.1667	58.5	34.3333	0	3	0	83.9333	67.2857	27.1667	0	0	1	38	79.5	50.6667	2	0	0
hsa-miR-592	1	4	5	0	0	0	18	10	4	0	0	0	3	4	8	0	0	0
hsa-miR-125b-5p	1120.69	866.519	832.241	208.333	975.15	20.3333	1644.64	894.95	750.133	1	0	3	1184.98	2024.13	1941.44	15.3333	1.33333	19.5556
hsa-miR-3189-5p	4	3	4	1	1	0	26	4	5	0	0	0	4	10	7	0	0	0
hsa-miR-3651	10	12	12	22	18	6	23.7	8	10.5	11.5	7	21.2	13	13.5667	10	5	41.3333	22
hsa-miR-5088	0	2	1.33333	3	2	0	8	2.05556	0	0	2	0	0	5.5	1	0	0	0
hsa-miR-545-5p	6.59091	3.42857	0.7	0	0	0	14.9576	3.325	1.5	0	0	0	2.92424	7.08674	5.14286	0	0	0
hsa-miR-4773	0	0	0	0	0	0	0	0	0	0	0	0	0	1	0	0	0	0
hsa-miR-371b-5p	1055	730.333	744	46	60	88.5	635	359.25	342.5	0	0	0	650.5	1743.75	913.833	7	4	10
hsa-miR-940	27.2	31.3333	14.5	19.4762	45.2193	10.7619	64.25	47.521	36.8333	1	0	3	34.586	40.5833	31.5	4	0	4
hsa-miR-33b-3p	364.644	266.91	226.722	7	16	4.5	825.417	405.5	428.5	0	1	0	323.667	733.144	619.306	0	0	0
hsa-miR-4653-5p	4	6.5	6	0	0	0	14	8	7	0	0	0	7.5	11	10	0	0	0
hsa-miR-588	17.5	16.5	16	0	1	0	39.5	24	19	0	0	0	25.5	39.8333	33.8333	0	0	0
hsa-miR-516b-5p	318.25	265.5	245	40	33.6667	92.5	104.5	73	44	1	2	2.16667	133	281.333	204	6	8	14.6667
hsa-miR-671-3p	825.3	1006.04	690.61	69.7833	97.2083	29.8333	1881.72	1055.1	682.261	14.75	5.5	24.5	799.661	1222.34	869.975	34.4167	16.9583	39.5
hsa-miR-1261	0	0	0	0	0.0909091	0	0.369048	0.142857	0	0	0	0	0	0.224838	0.0714286	0	0	0
hsa-miR-545-3p	25.5	19.225	11.8214	0	0	0	45.1802	15.0195	7.84286	0	0	0	21.2036	26.1179	34.2	0	0	0
hsa-miR-5703	0	0	0	0.5	2	0	0	0	0	0	0	0	0	0	0	0	0	0
hsa-miR-184	6	10	9	13.5	22	8	21	12	4	3.5	11	13	7	6	7	9	31	5
hsa-miR-146a-3p	16.3333	19.3333	20.5	2	1	0	106.143	56.3095	57.5	1	0	1	22.0833	65.9167	32.9167	0	0	0
hsa-miR-449c-5p	253	192	238	19	26	0	749	401	260	3	1	3	232	358	268	1	1	0
hsa-miR-93-3p	1679.33	1126.89	1457	61.8333	55	17.6667	3225.57	1609.2	1248.58	2	0	6	1517	2634.11	2621.31	7.5	2	9
hsa-miR-5087	4	1	1	0	0	0	5	0	0	0	0	0	1	1.5	1	0	0	0
hsa-miR-135b-5p	101.143	73.5	69.8333	12.2	34.5	0	134.143	73.8333	46	0	0	1	163.583	331	175	0	0	0
hsa-miR-195-5p	49.8436	61.3389	64.0167	4.53333	2.66667	0.25	378.046	207.744	134.783	0	0	0	48.7292	109.428	114.469	0	0	1
hsa-miR-3913-3p	62.1667	58.5	34.3333	0	3	0	83.9333	67.2857	27.1667	0	0	1	38	79.5	50.6667	2	0	0
hsa-miR-1292-3p	4.16667	3	1	0	1	0	5	8	4	0	0	0	3	8	8	0	0	0
hsa-miR-125a-3p	16	16	17	19	21.1111	7.09091	14	6	3.31111	0	0	0	6	45	15.5	3	4	3
hsa-miR-548av-3p	15.2214	16.4608	6.61627	0.416667	0.219298	0	24.7044	13.7974	7.83155	0	0	0	9.91443	25.8384	11.7016	0	0	0.0833333
hsa-miR-5701	109.806	143.074	87.8247	0.5	1.16667	0	195.843	133.477	119.733	2.33333	0	2.28571	226.715	501.032	348.947	0	0	0.4
hsa-miR-450b-3p	1	0	0	0	0	0	1.5	1	0	0	0	0	0	0	3	0	0	0
hsa-miR-3187-5p	125.7	87.5667	77.0769	7	8	0	191.333	147.5	91	0	0	0	68.7	188.309	100.2	1	0	11
hsa-let-7a-2-3p	19	20	7	6	8	0	20	16.5	18	0	0	0	9.0625	30	21	0	0	0
hsa-miR-4497	11.8755	12.9833	1.10714	74.483	109.691	100.551	14.5	3.53407	2.5	7.28333	12.5548	62.0936	9.14286	11.0524	11.9885	31.1579	30.3119	42.3074
hsa-miR-1181	0	0	0	0	0	0	0	0	0	0	0	0	0	0	1	0	0	0
hsa-miR-224-3p	26.5	18.5	17	3	4	0	122.5	86.5	57.5	0	0.5	0	38	63	42.5	0	0	0
hsa-miR-3121-3p	20.5	22	14	4	7	18	20.5	24.0588	7.5	1	0	1	30	37.75	16.5	1	0	1
hsa-miR-520d-3p	6	4	2	0	0	0	1	1	1	0	0	0	2	1	2	0	0	0
hsa-miR-4447	0	0	0	0	0	0	0.0588235	0	0	0	0	0	0	0	0	0	0	0
hsa-miR-3182	96.7835	103.817	51.0909	70.7348	60.1212	1.5	293.066	165.848	61.9318	17.3561	8.67424	25.5909	91.0985	133.569	60.4061	11.3409	7	14.5833
hsa-miR-450b-5p	2262.83	2075.62	2282.16	32.1111	24.25	27.1429	5303.05	3317.34	1635.95	13	7	44.0333	1876.38	2731.59	2101.11	5	10.3333	32.5
hsa-miR-4792	0.0666667	0.0666667	0.2	152.794	79.8031	107.9	0.571429	0.804762	1	59.7333	20.1667	22.5	1	0.2	0.833333	3.43645	5.67143	11.6476
hsa-miR-4683	9	10	4	0	3	0	12	11	3	0	0	0	9	15	8	0	0	0
hsa-miR-452-5p	1327.32	1203.08	1049.24	92	76.75	21	8927.77	4815.19	3026.05	7	3	3	1606.95	2610.79	1782.2	4	1	1
hsa-miR-4691-3p	4	7.5	7	0	0	0	20	13	3	0	0	1	8	4	10	0	0	0
hsa-miR-3654	0	0	0	0	0.533333	0	0	0.392857	0	0	0	0.2	0.25	0	0.5	0	0	0.333333
hsa-miR-1228-5p	8	5.2	3.2	1	0	0	34.3333	15.6	5.16667	0	0	0	10	11	11	0	0	0
hsa-miR-642a-5p	75.6	45.8333	66.2	3.67619	3	0	178.167	66	42.8333	0	0	0	75.6667	82.1111	107.515	0	0	0
hsa-miR-3156-5p	0	0	0	0	0	0	0	1	1	0	0	0	0	1	0	0	0	0
hsa-miR-299-3p	0	0	0	0	0.0588235	0	0	1	0	0	0	0	0	1	0	0	0	0
hsa-miR-636	45	35	36	7	12.1	0	104.5	61	61.5	0	0	0	40	65.5588	50	2.07143	1	2
hsa-miR-548j	49	42.0714	39.6955	8.33333	19	6	96.3929	49.6429	40.5288	0	0.5	1	39	69.8195	63.6955	0.25	0	1
hsa-miR-607	0.125	0	1	0	0	0	3	1	2	0	0	0	0	3	1	0	0	0
hsa-miR-4254	1	0	0	0	0	0	6.25	0	3	0	0	0	0	1	1	0	0	0
hsa-miR-520e	2	2	1	0.333333	0	0	1	2	0	0	0	0	0	3	1	0	0	0
hsa-miR-520c-5p	1.91667	1.4	0.85	0.45	0	0	0.4	0.2	0.85	0	0	0	0.25	1.725	0.4	0	0	0
hsa-miR-578	29.5	43	20	0	0	0	46	25	12	0	0	0	27.3333	29.25	25.5	0	0	3
hsa-miR-4766-5p	0	1	1	0	0	0	1	1.33333	3	0	0	0	3	4	2	0	0	0
hsa-miR-3150b-5p	13.6667	7.55263	10.5	2	2	0	17.5	19	7	0	0	0	10.5	10.3333	16.1429	0	0	0
hsa-miR-383	0	0	0	0	0	0	0	0.5	0	0	0	0	0	0	0	0	0	0
hsa-miR-4716-3p	0	0	0	0.5	0.5	0	1	0	0	0	1	0	0	1.33333	0.5	0	0	0
hsa-miR-3174	27.0909	33	27	19	7	11	119	56	37	4	3	6	29	65.5	39	1	1	1
hsa-miR-25-5p	2852.33	2275.61	3192.83	66	222.2	185.167	4779.87	2506.75	1728.83	34.6667	25	65	3127.58	5011.2	4979.31	46.6667	17	39
hsa-miR-934	39	33	20.3333	0	0	0	33	23	14.25	0	0	0	42.5	46.5	59	0	0	0
hsa-miR-3939	34	26	16	1	2	0	48	33	33	0	0	0	36	62	42	0	0	0
hsa-miR-548am-3p	13.063	13.5409	10.7734	0.25	0	0	25.0581	21.4874	17.8135	0	0	0.666667	15.7595	44.7617	26.7392	0	0	0
hsa-miR-424-5p	567.833	390.75	370	6	2	0	971.494	555.867	317.22	0	0	0	451.5	698.987	651.2	0	0	0
hsa-miR-3178	1.66667	3.33333	1	1.83333	4.5	60.7333	10.3333	3.66667	4.33333	0.166667	0.5	0.833333	1.16667	4.83333	1.16667	0.666667	0.5	0.166667
hsa-miR-194-5p	10071.8	5586.72	7515.34	956.078	1383.24	42	52052.7	24808.4	19048.4	32	29	68	10345.5	17939.1	16935.5	28	21	46
hsa-miR-548b-3p	4.47619	2.66667	3.66667	1	0	0	9.33333	4	10.3333	0	0	0	5.33333	15.6667	4	0	0	0
hsa-miR-3667-3p	0	0	0	0	0	0	1	2	0	0	0	0	0	1	1	0	0	0
hsa-miR-4651	3	1	0.5	0	0	0	7	2	2	0	0	0	6.75	7	10.5	0	0	0
hsa-miR-148a-5p	5692.85	6639.21	4134.63	231.25	123	195.033	11823.8	8815.32	5992.18	118.333	46	192.762	5180.99	9914.81	5100.61	56	36.6667	67.5
hsa-miR-4742-3p	54.5	38	51.3333	1	1	0	155.258	92.5	67.5833	0	0	0	36.5	78.6667	57.95	2	0	0
hsa-miR-4781-3p	7	5	6	0	1	0	6.4	8	3.33333	0	0	0	4	14	6	0	0	0
hsa-miR-4518	1	0	0	0	0	0	0	1	0	0	0	0	0	0	0	0	0	0
hsa-miR-609	2	0	1	0	0	0	1	3	1	0	0	0	0	0	0	0	0	0
hsa-miR-3609	8.125	4.25	8.16667	1.125	0	0	16.8929	10.125	10	0	0	2	7.125	8.175	14.75	1	0	0
hsa-miR-3944-3p	43	29.5	31	19.5	16.5	0	113.2	49	26	0	1	1	36.5	55	73	0.5	4	10.5
hsa-miR-548aw	1	0	1	0	0	0	0	0	0	0	0	0	1	0	1	0	0	0
hsa-miR-4716-5p	0	0	0	0.5	0.5	0	1	0	0	0	1	0	0	1.33333	0	0	0	0
hsa-miR-548a-3p	12.2643	5.85	12.3452	1.5	0	0	46.1251	23.2357	20.6952	0	0	0	14.9333	20.2786	20.825	0	0	0
hsa-miR-6126	0	0	0	0	0	0	0	0	0	0	0	0.0555556	0	0	0	0	0	0
hsa-miR-4440	2.25	1.5	1.5	0	0.75	0	4.75	4.5	3.5	0	0	0	2.25	2.75	3.25	0.5	0	0
hsa-miR-1255a	101.857	120.536	127.013	7	14	0	324.226	174.724	111.101	0.5	6	1	112.45	231.721	148.196	0	1	2
hsa-miR-378h	3.07692	8.14603	5.3171	2.16667	2.9	0	10.9906	10.619	7.15	0	0	0.2	3.8	8.81303	2.4623	0.166667	0.366667	0.2
hsa-miR-99b-5p	9091.83	15101	6948	686.5	1011.5	1032.83	6164.14	4119.5	1973	21	12	47	7014.67	11559.6	6601.5	410	202	517.5
hsa-miR-19b-2-5p	0	0	0	0	0	0	0	0	0	0	0	0	0.4	0	0.5	0	0	0
hsa-miR-4727-5p	0	0	0	0	0	0	1	0	0	0	0	0	0	0	0	0	0	0
hsa-miR-221-5p	5406.26	3169.68	5271.17	166.562	205	6	7056.54	4174.55	3425.56	41.3333	19	73	5160.39	7812	6498.82	16	4	35
hsa-miR-548at-3p	5	2.5	2	1	0	0	9.55556	7.47619	5.20168	0	0	0	4	13	6	0	0	0
hsa-miR-3664-3p	59.5	38.5	29.8333	18	16.0769	0	129.917	90.8333	56.5909	2	3	2	41.25	60.5	71.5	0	0	2
hsa-miR-451b	0	0	0	0	0	0	0	1	0	0	0	0	0	0	0	0	0	0
hsa-let-7f-2-3p	857.433	841.783	750.583	94.25	39.4167	12.6667	1627.23	1177.82	868.061	10	2	2.33333	943.793	1875.14	1334.25	3.33333	0.333333	6
hsa-miR-4648	2	1	1	0	1	0	5	3	0	0	0	0	0	1	4	0	0	0
hsa-miR-551a	81	75	41.5	9.33333	5	0	210	108	84.0556	0	0	0	61.25	124.768	97.75	0	0	0
hsa-miR-4749-5p	0	0.5	2	0.5	0	0	7	3	2	0	0	0	0	2	4.5	0	0	0
hsa-miR-1295b-5p	1	1	1	2	0	0	17	7	4	0	0	0	1	12	6	0	0	0
hsa-miR-4660	22	17	16	3	1	0	46	17	14	0	0	0	10	22.5	16.5	0	0	0
hsa-miR-2964a-3p	13.3333	10	19.5	0	0	0	50	27.8333	15.5	0	0	0	15	27.1	20.5	0	0	0
hsa-miR-1292-5p	342	410.5	240.5	78.2	100.333	109	747.333	476.5	301	7	6	22.5	323	519.5	437	18	11	15
hsa-miR-4670-3p	1	0.5	0.5	0	0	0	0	0.5	0	0	0	0	2.5	0.5	0	0	0	0
hsa-miR-550a-3p	100.75	49.3036	62.75	0	2	1	255.261	123.542	126.083	2	0	0	95.5	131.25	130.029	0	0	0
hsa-miR-3144-3p	9	3	11	0	0	0	68.75	53.3333	27	0	0.142857	0	19.5	21.3333	11	0	0	0
hsa-miR-4720-5p	1	0	0	0	0	0	0	0	0	0	0	0	1	0	2	0	0	0
hsa-miR-150-5p	1	1	3	3.5	9	0	12	6	3	3	0	3	5	6	4	7.83333	0	3
hsa-miR-5684	0.666667	1.4	0	0.533333	0	0	1.8	1.06667	0.866667	0	0	0.2	1.06667	0.733333	0.866667	0	0	0
hsa-miR-361-3p	5178.35	5201.48	4589.5	255	477	302	14598.5	8081.83	6276	118	50	236	5854.67	7681.85	6198.67	264	105.333	129.5
hsa-miR-6133	0	0	0	0	0	0	0.111111	0	0	0	0	0	0	0.0588235	0	0	0	0
hsa-miR-4446-3p	18	15	14.5	3.1	19.5	3.5	66.8333	20.1667	19	0	0	8	12	15	22.75	3	1	10
hsa-miR-3127-3p	16.2	23	11.0333	7.14286	15.75	12	77.6667	35.875	41.4345	0	0.333333	0	19.1111	21	35.8889	0	0	1
hsa-let-7e-5p	2275.21	2166.04	2722.18	322.188	598.899	75.25	4111.86	2322.5	1466.66	40.4639	40.1813	139.699	2569.52	4492.44	3672.71	47.044	7.76667	41.2889
hsa-miR-4510	104.58	117.849	122.377	30.9778	62.025	2.23571	315.013	187.732	101.591	5.39683	3.575	7.4369	152.451	288.767	214.646	2.74405	1.14286	0.267857
hsa-miR-628-5p	298.5	198.143	182.333	23	18	5	1259.09	581.905	353.5	1	0	1	251.5	448.5	351.5	2	0	5
hsa-miR-4301	0	0	0	0	0	0	0	0	0	0	0	0	0	0.111111	0	0	0	0
hsa-miR-3192	7	2	10.3333	1	2	0	21	4	1	0	0	0	4	6	5	2	0	1
hsa-miR-4708-5p	13	7.91667	11.0667	0.5	1.7	0	45.7125	18.8929	24.6667	0	0	0	13.625	21.3625	25.5353	0	0	0
hsa-miR-1227-5p	0	0	0	0	0	0	1	0	0	0	0	0	0	0	0	0	0	0
hsa-let-7f-1-3p	1710.94	1703.87	1374.79	187.25	210.143	76.5	3229.48	2162.82	1910.9	13.5	11	14.5	1503.14	3582.31	2920.64	12	8.5	7
hsa-miR-100-3p	5	1	0	0	0	0	6	5	0	0	0	0	10	12	9	0	0	0
hsa-miR-3133	17.0667	19.8916	17.9507	1.96667	0.5	0	78.266	29.4725	19.155	0.5	0	0.25	19.8474	22.7028	20.3794	0	0	0
hsa-miR-583	0	0	1	0	0	0	0	0	0	0	0	0	0	1	0	0	0	0
hsa-miR-760	949.412	720.226	1066.94	147.266	286.266	232.315	2827.16	1350.32	1053.16	21.3333	28	69	895.446	1223.09	1162.34	143.843	28	38.136
hsa-miR-203b-3p	755.125	746.458	570.833	16.5	16	18.3333	399.033	248.917	148.5	17	3	16	752.417	1117.79	729.111	8	16	23
hsa-miR-345-5p	8717.7	6004.46	4780.2	534.311	946.915	339.2	12081.3	6888.44	6325.89	33.386	6	91.6538	5456.3	12906.5	8291.6	47.3333	11	22
hsa-miR-877-5p	987.621	756.194	677.75	285.929	346.547	103.75	2602.96	1093.56	653.658	37.0833	11	80.3333	750.533	1221.24	860.325	28.9167	10.5	25.75
hsa-miR-4724-5p	1	1	1	3	6.5	0	10	0	2	0	0	0	4	8	6	0	0	0
hsa-miR-4700-3p	1	0	0	2	1	0	2	1	0	0	0	0	0	0	0	0	0	0
hsa-miR-27b-5p	1156.17	1075.41	1051.83	12	17	14	3106.74	1691.5	1105	16	9	27	1057	1540	1223.08	4	3	16
hsa-miR-5000-3p	6	6	6	0	0	0	24.3333	21	1	0	0	0	15	16	4	0	0	0
hsa-miR-1227-3p	36.5	28	23.3333	7	11.3333	5.33333	81.6	34.7333	27.5	0	0	1	22	44	51.2	0	2	0
hsa-miR-659-3p	1.5	1	4	0	0	0	5	1	2	0	0	0.125	2.5	3.5	1	0	0	0
hsa-miR-3929	8.5	16.3333	11.5	4	5.5	0	1.5	3	4	0	0	0	38	53.3667	26.825	0	0	1
hsa-miR-1256	5.65	2.50595	2.60476	0	0.833333	0	11.5095	9.9381	3.5	0	0	0	7.08333	9.17976	5.24167	0	0	0
hsa-miR-105-5p	0	0	0	0	0	0	0	1	0	0	0	0	0.666667	4	1	3	0	0
hsa-miR-4755-3p	31.1111	30.0833	16	3	0.5	10.5	41.8333	21	17.625	0	0	0	25.75	64.75	38.7	0	0	0
hsa-miR-1224-3p	1	2	3	0	0	0	16.5	4.33333	2	0	0	0	2	3.5	0	0	0	0
hsa-miR-199a-3p	36.119	23.1667	37.1667	5.33333	4.5	0	145.348	94.9	56.6667	1.33333	0.666667	0.666667	49.5079	88.0167	81.6667	0	0	0
hsa-miR-3921	1	1	0	0	0	0	0	0	0	0	0	0	0	0	0	0	0	0
hsa-miR-30d-3p	524.091	467.317	371.7	5.5	6	0	1051.33	699.717	360.783	0	1	1	543.376	1207.63	795.845	0	3	7
hsa-miR-125b-1-3p	66	84	49	116.333	233.111	21	113.25	69	55.6111	0	0	0	64	173	135.5	7	4	5
hsa-miR-190a	164.333	99.7	100	0	0	0	518.917	295.917	152.5	0	0	0	152.5	239.225	220.611	0	0	0
hsa-miR-4774-5p	2	4	2	1	0	0	11	5.25	2	0	0	0	1	4.5	4.66667	0	0	0
hsa-miR-32-3p	1726.57	1165.78	1211.49	9.33333	11	7.5	2934.17	1820.63	1163.03	1	0	0	1419.84	2779.85	2100.48	1	1	3
hsa-miR-1307-5p	586.367	826.867	622.5	493.061	162.167	105.75	1746.56	1223.33	663.167	54	10	66.5	859.5	1719.98	1591.07	108.5	31	13
hsa-miR-4500	0	0	0	0	0	0	0	0	0	0	0	0	0.1	0.1	0	0	0	0
hsa-miR-4435	24	40	20	4	5	6	23	13	8	0	0	0	9	25.6667	12.5	3	0	5
hsa-miR-4273	0	0	0	0	0	0	0	1	0	0	0.117647	0	0	0	0	0	0	0
hsa-miR-708-5p	0	2	1	0	0	0	1	2.33333	1	0	0	0	0	0.583333	4	0	0	0
hsa-miR-525-3p	1	0	0	1	0	0	0	0	0	0	0	0	0	4	0.5	0	0	0
hsa-miR-488-3p	0	0	0	0	0	0	0	0	0	0	0	0	0	1	0	0	0	0
hsa-miR-2467-3p	12.8333	4.5	9	4.5	2	0	24.7667	12.8333	4	0	0	1	6.5	11	9.75	0	0	4
hsa-miR-4466	5.83333	1	2.1	5	5.5	0	13.7	6.33333	1	1	0	1.5	4.1	10.8111	7.25	2	0	0
hsa-miR-4769-3p	0	0	0	0	0	0	0	1	0	0	0	0	0	1	1	0	0	0
hsa-miR-548y	0	0.333333	0	0	0	0	0	0	0	0	0	0	1	0	0	0	0	0
hsa-miR-548ab	2.55128	1.66667	0.508741	0.237179	0	0	4.37471	2.19056	0.328089	0	0	0	1.57809	1.88228	1.44697	0	0	0
hsa-miR-181a-3p	2838.83	2590.83	2339.1	146.5	196.833	79.5	2293.45	1336	980.5	53	27	78.5	2625.33	3849.67	2799.5	30.5	9.25	54
hsa-miR-664a-5p	17	37	18	30	20.3333	17	54.5	37.5	25.5	6	1	8	21	43.75	27.5	1	3	8
hsa-miR-34a-5p	2839	1342.57	2296.17	31.5	20	0	5452.73	3122.76	1909.31	0	0	0	2225.33	4687.59	3581.94	0	0	0
hsa-miR-711	0	0	0	0	0	0	0	0	0	0	0	2	0	0	0	0	0	0
hsa-miR-335-5p	586.226	405.083	362.226	206	103.5	11	1076.54	695.7	441.708	13	6	23	570.311	1042.08	1117.45	3	0	4
hsa-miR-466	21.2	12	16.0333	0.2	3	0	94.1292	26.2	21.4333	0	0	0	10.5	39.0333	29.2	0	0	0
hsa-miR-5588-3p	0.5	2	0	0	0	0	6	1.125	4	0	0	0	4.5	1	0	0	0	0
hsa-miR-4425	0	0	0	0	0	0	0	0	0	0	0	0	1	0	0	0	0	0
hsa-miR-99b-3p	802.5	1040	659.091	95.125	114	39	457.033	278.25	180	0	0	6	587.833	884.158	563.1	26.5	36	32
hsa-miR-26a-5p	276482	251170	274416	17968.1	38152.2	3871.46	651489	325996	268527	2595.89	1397.17	6204.57	258440	606428	472859	2115.02	1489.21	2738.5
hsa-miR-5091	19.3333	17.3333	16.5	0	0	0	86.2333	26.25	22	0	0	0	13.3333	38.5	14.0667	0	0	0
hsa-miR-320a	84633.1	68339.4	74521.8	30926.6	26754.6	26731.7	207406	102624	75311.7	2706.73	2592.67	7766.32	89074.3	140415	114006	5746.68	1123.23	1932.69
hsa-miR-16-2-3p	8235.7	7047.14	6153.95	862.492	1314.64	490.476	13561.6	8088.71	6211.13	45	66.5	172.6	7988.45	14275.4	11487	102.5	57.5	72.5
hsa-miR-1225-5p	0	0	0	2	0	0	1	0	0	0	0	0	0	0	0	0	0	0
hsa-miR-4288	0	0	0	0	0	0	0	0	0	0	0	0	0.0833333	0	0	0	0	0
hsa-miR-181a-5p	33924	24956.6	26132.9	9737.79	6837.81	349.376	35525.8	22382.2	18364.6	456.5	220.333	724	35009.6	75673	63029.2	204.9	99.6667	328.167
hsa-miR-4662a-3p	0	0	0	0	2	0	1	0	0	0	0	0	0	1	0	0	0	0
hsa-miR-4766-3p	4.5	7	2	0	0	0	5	3.5	2	0	0	0	3	5	4	0	0	0
hsa-miR-1249	60	47	63.8333	12	5.5	0	245.5	121.667	126.5	4	0	0	72.5	100.833	120.476	1	3	2
hsa-miR-4647	5	13	2	3	3	0	8.5	9	4	0	0	6.2	4	9	1	2	0	0
hsa-miR-3165	27	16	19	4.33333	1	0	55.5	32.2	16	0	0	0	27.7	41.5	33.5	0	0	0
hsa-miR-1827	0.142857	1.31279	0.571429	0.162338	0.253968	0	2.88456	1.12089	0.571429	0	0.0909091	0	3.70694	1.45833	0.519481	0	0	0
hsa-miR-5695	7.5	9	6	0	0	0	20.8333	10	3	0	0	0	5	19	14	0	0	0
hsa-miR-548c-3p	0	0.272727	0	0	0	0	0.607955	0.181818	0.0909091	0	0	0	0	0	0.153846	0	0	0
hsa-miR-1299	3.02424	3.96667	1.84091	0.524242	0.333333	0	3.01587	1.92424	1.25758	0	0	0	2.56234	3.99167	2.11667	0	0	0.166667
hsa-miR-4701-3p	0	0	0.142857	0	0	0	0.166667	0	0	0	0	0	0	0	0	0	0	0
hsa-miR-374c-3p	9373	6633.78	6987.79	452.476	498.783	36.3333	21447.3	10916.5	7371.25	88.125	23	59	8180.9	12956.3	11865.9	33	27	65
hsa-miR-6131	0.1	0	0	1.58182	3.11063	0.183333	0.274242	0.0833333	0	0	0.0555556	0.290909	1	0.138889	0.190909	0	0	0.0909091
hsa-miR-3130-3p	18.6667	23.0833	14	0	0	0	55.6667	26	28	0	0	0	25	37	52	1	0	0
hsa-miR-320b	2768.3	2396.47	2668.24	5593.92	5879.69	4935.73	7196.53	3833.2	2902.81	928.481	740.302	2508.36	3054.73	5275.26	4471.27	1505.38	186.668	348.623
hsa-miR-505-5p	14	18	17	17	36	0	117	60	53	0	1	2	26	50	67	1	0	1
hsa-miR-4639-5p	10	17	11	0	0	0	30	25	7	1	1	0	16.5	11.5	11	0	0	0
hsa-miR-1264	0	0	1	0	0	0	0	1	0	0	0	0	0.5	0	0	0	0	0
hsa-miR-4729	0	0	0	0	0	0	2	0	0	0	0	0	0	2	0	0	0	0
hsa-miR-5583-3p	6.5	8	1	0	0	0	18	11	7	0	0	0	4	12	4	0	0	0
hsa-miR-3188	14	10	13	1	7	0	34.5	17.25	7	0.25	0	0	9	20	17.25	0	0	0
hsa-miR-3664-5p	22.5	15.8333	13.5	0	2	0	39.5	23.4333	19	0	0	0	10.5	31	20.5	0	0	0
hsa-let-7a-5p	332885	270462	327917	45319.6	72475.6	13352.6	795718	413850	258677	14942.3	13260.7	50949.3	376841	766420	522081	5892.38	2339.62	7757.09
hsa-miR-192-5p	90645.9	108797	64620.9	15408.6	7033.01	4934.4	289435	202775	105187	1823.57	653.333	2308.24	92680	164196	82566.5	740.833	739.25	1375.92
hsa-miR-7-5p	430902	530746	421937	2439.33	3720.1	1337.83	794290	553991	262654	589.933	325.75	1946.1	408933	656337	431791	388.55	359.6	874.581
hsa-miR-548l	45.3333	36.0833	49.4444	4.5	10.5	0	163.417	89.3333	58.5	0	0	0	57.4167	123.25	90.125	1	1	0
hsa-miR-4433-3p	1	0	0	0	0	0	3	4	2	0	0	0	2	1	2	0	0	0
hsa-miR-3136-5p	17	10	13	0	0	0	53.5	50	36.1429	0	0	0	10	22	38	0	0	0
hsa-miR-1283	27	25	18	4	0	0	17	11.2222	5.66667	0	0	0	12.5	49	27	0	0	0
hsa-miR-499a-3p	3	4	5	0	0	0	1	8	6	0	0	0	11	9	7	0	0	0
hsa-miR-548e	532.553	627.367	467.9	28.5	17.5	1	1636.47	1044.37	528.758	7	3	10.6667	525.605	757.886	599.601	1.5	2	2
hsa-miR-629-3p	294	177.25	222.533	106.083	66.8333	22.5	725.95	353.367	264.25	9	8	20	272	369.333	332	10.5	4.5	11.5
hsa-miR-5689	0	0	0	0	0	0	1	0	0	0	0	0	0	1.16667	0	0	0	0
hsa-miR-4771	0	0	0	0	0	0	1	0	0	0	0	0	0	1	0	0	0	0.4
hsa-miR-5006-3p	13	8.33333	11.5	2	2	0	50.8333	20.3667	17.2	0	0	0	7	35	16	0	0	0
hsa-miR-130b-3p	624.578	487.2	435.9	1571.34	305.1	92.3333	977.283	563.222	400.233	28.8333	11.5	10.6667	619.7	1340.03	986.028	13	12.3333	22
hsa-miR-655	0	0	0	0	0	0	1	0	0	0	0	0	0	0	0	0	0	0
hsa-miR-518d-3p	1	0	0	0	0.0588235	0	0	0	0	0	0	0	0	1	0	0	0.125	0
hsa-miR-377-3p	1	0	0	0	0	0	0.166667	0	0	0	0	0	0	1	0	0	0	0
hsa-miR-4319	0	0	0	0	0	0	0	0	0	0	0	0	0	0	0.0526316	0	0	0
hsa-miR-374c-5p	61.1004	33.0492	41.122	1	3.75	0.333333	129.104	52.2205	47.6292	2.125	0	0	39.5242	74.3418	73.8985	0	0	0
hsa-miR-137	0	2	0	0	0	0	3	1	0	0	0	0	0	1	1	0	0	0
hsa-miR-199b-3p	18.3095	11.5833	18.5833	2.66667	2.25	0	72.6742	47.45	28.3333	0.666667	0.333333	0.333333	24.254	44.0083	40.8333	0	0	0
hsa-miR-454-3p	1395.58	876	1666.33	17	30	0	4220.71	2309.83	1340	2	0	4	1527.33	2846.71	2682.42	3	2	3
hsa-miR-4639-3p	1	0	0	0	0	0	1	0	0	0	0	0	0	3	0	0	0	0
hsa-miR-331-3p	2224.24	1247.24	1431.62	22.1667	53.9167	0	3968.46	2229.51	2202.74	1	3	1	1897.17	3383.16	2640.14	0	6	5
hsa-miR-1278	2870.56	2206.83	2251.39	8	20	41	4932.5	2906.06	1654.25	2	1	7	3084.79	4876.75	2624.48	0	1	2
hsa-miR-187-3p	10	6.5	6	1	2	0	62.0588	38	33	2	0	0	5	19	11	0	0	0
hsa-miR-3150a-3p	12.6667	6.55263	10.5	2	2	0	17.5	19	5	0	0	0	10.5	10.3333	17.1429	0	0	0
hsa-miR-6720-3p	0	0	0	0	0	0	0	0	0	0	0	0	0	0	0	0.125	0	0
hsa-miR-523-3p	9	4	3	0	0	0	2	4	0	0	0	0	6	9	4	0	0	0
hsa-miR-6505-3p	9.5	7.64286	6.25	1	3.25	0	28	20.95	9	0	0	1	8.2	22	20.3333	0	0	0
hsa-miR-577	341.5	210.7	304.5	56.8333	66.125	11.5	723.208	364.768	281.667	10	5	19	325.875	471	553	2	5	9
hsa-miR-382-5p	1	2	1	0	0.333333	0	4	3.83333	2	0	0	0	1	6.83333	2	0	0	0
hsa-miR-1973	0.903571	0.417857	0	0	0	0	1.44206	0.807937	0.596825	0	0	0	0.385714	2.15182	5.00926	0	0	0
hsa-miR-4473	21385.5	11560.6	13215.9	78	158	154	29317.6	18660.8	19021.7	11	1	11	16277.7	35434.1	18379.9	16	5	20
hsa-miR-1234-5p	0	0	0	0	0	0	0	0	0.1	0.0666667	0	0	0	0	0	0	0	0
hsa-miR-3129-3p	2	0	0	0	0	0	6	2	5	0	0	0	0	1	1	0	0	0
hsa-miR-3115	2.14286	1	1.33333	2	3	0	16.8333	9	2	0	0	0	6	8	7	0	0	0
hsa-miR-4746-5p	85.5	264	66	14	10	36	128	138	44	2	4	5	118	179	144	12.25	9	16
hsa-miR-107	13414.1	10182.7	11863	837.554	454.583	50.0333	49201.2	26217.5	17759	28.5	15.1167	50.999	12407.6	21154.1	24443	10.7576	7.43182	16.7652
hsa-miR-5003-5p	4	2	1	0	0	0	0	0	0	0	0	0	0	2	1	0	0	0
hsa-miR-5010-3p	517.383	597.21	427.861	29.5	34.75	49.3333	1353.94	836.712	654.504	7	1	6	413.5	990.383	681.722	5	6	10
hsa-miR-4804-5p	10	16	9	3.2	7	0	33.2	11	12	0	0	0	13.5	28.0714	14.125	0	0	0
hsa-miR-376a-5p	0	0	0	0	0	0	0	2	0	0	0	0	0	1	0	0	0	0
hsa-miR-300	0	0	0	0	0	0	0.111111	0	0.166667	0	0	0	0	0	0	0.142857	0	0
hsa-miR-188-5p	208.833	165.167	106.533	35	9	0	560.25	309.5	202.367	0	0	0	173	302.333	261.25	0	0	0
hsa-miR-3678-5p	2	1	2	1	0	0	2	1	3	0	0	2	0	2	0	0	0	0
hsa-miR-4733-3p	1	2	1	0	0	0	3	0	3	0	0	0	0	1	1	0	0	0
hsa-miR-4775	22.8333	14.5	27	5.5	5.5	0	24.5	20	5	1.5	0	1	8.5	27.5	18.5	0.0909091	0	1
hsa-miR-495-3p	1	2	3	0	0	0	9	14.625	5.325	0	0	0	5	10.5	6.5	0	0	0
hsa-miR-4671-3p	0	0	0	0	0	0	0	0	0	0	0	0	0	0	1	0	0	0
hsa-miR-4658	1	0	1	4	14	9	7.14286	2	0	2	0	0	1	0	1	3	1	0
hsa-miR-933	13.5	14.5	12	2	8.5	0	12.2222	9	8	0	0	1	7	14.8333	13	0	0	2
hsa-miR-4516	0.5	0.333333	0	54.721	21.7889	1.33333	0.6	0.5	0	5.89683	11.3123	19.1119	0.5	1.32917	2.59091	0.865079	2.33333	3.92917
hsa-miR-4475	0	0	1	0	0	0	0	0	0	0	0	0	0	0	0	0	0	0
hsa-miR-518c-3p	22	11.3333	13	0	0	0	7.14286	8.5	2	0	0	0	9	20	14.5	0	0	0
hsa-miR-4681	0	1	0	0	0	0	0	0	0	0	0	0	0	0	0	0	0	0
hsa-miR-627	33.5	20.5	26.25	3	0	0	83.2	46.5	24.5	0	0	1.2	24	38.0833	38	0	0	0
hsa-miR-204-5p	302.083	368.294	314.043	1	4	2	855.971	617.24	443.494	2	0	8	572.3	1006.6	669.892	4	1	1
hsa-miR-409-3p	1	3.5	0	0	0	0	9.2	8	7	0	0	0	3	3	1	1	2	0
hsa-miR-4666a-3p	0	0	0	0	0	0	0	0	0	0	0	0.0714286	0	0	0	0	0	0
hsa-miR-3940-3p	496.653	357.318	526.392	6	8.5	0.333333	1578.47	799.5	673.796	1	0.5	3	515.694	802.175	717.583	1	0	4
hsa-miR-4787-3p	15	6	8	9	7	13	474.333	223	286.533	25	34	21	22	37	42	1	0	0
hsa-miR-513c-3p	0	0	0	0	0	0	0.0714286	1.66667	0	0	0	0	0	0	0	0	0	0
hsa-miR-548az-3p	0	0.05	0	0	0	0	0.05	0	0	0	0	0	0	0.15	0.0526316	0	0	0
hsa-miR-212-5p	672.833	835.167	532.417	27.9167	60	10.5	1743	1095	612.667	8	7	13	646.167	1157.64	694	7	9	7
hsa-miR-519b-5p	4.33333	3.66667	3.2	1.5	0.833333	0	1.66667	1.47619	1.30952	0	0	0	1	2.16667	2.30952	0	0	0
hsa-miR-183-5p	111386	146721	98886.2	32131.9	16473.1	6434.63	243412	149318	81679.4	4069.91	2140.43	6468.26	105488	195885	118371	3086.43	4223.67	7867.6
hsa-miR-15a-3p	16	9	11	1	0	0	14.7	8	7	0	0	0	11.5	24	26.8333	0	0	0
hsa-miR-135b-3p	4	3	4	3	3	0	7	2	6	0	0	0	2	9.5	13	0	0	0
hsa-miR-3614-3p	0	1	0	0	0	0	4	2	1	0	0	0	1	0	1	0	0	0
hsa-miR-548ai	1.66667	1.09091	2.83333	0.25	0	0	7.76667	3.5	3.33333	0	0	0	1.33333	4.16667	5.75	0	0	0
hsa-miR-4520a-3p	0	1	0.5	0	0	0	0	0	0.333333	0	0	0	0	2.33333	1.5	0	0	0
hsa-miR-501-3p	781.333	717.5	837.333	358	264.417	146	3656.67	2089.13	1414.33	40	15.5	75	939.333	1172.17	1126.12	77	47	102
hsa-miR-574-5p	14.4711	12.5263	17	0.263158	0.736842	0	46.5559	28.9046	19.5263	0.0526316	0	0.263158	14.5263	23.7895	26.4132	0	0.157895	0
hsa-miR-4695-5p	0	1	0	0	0	0	2	1	0	0	0	0	1	0	0	0	0	0
hsa-miR-33a-3p	233.517	137.167	165.667	0	0	0	543.125	276.072	195.333	2	0	0	211.042	324.955	235.667	0	0	0
hsa-miR-1909-5p	1	1.5	3	2	2	0	8	7	5	0	0	0	6	4	7.14286	1	0	0
hsa-miR-548g-3p	0	0	0	0	0	0	0	1	0	0	0	0	0	0	0	0	0	0
hsa-miR-548ao-5p	0	0	0	0	0	0	0	0	0	0	0	0	0	0.125	0	0	0	0
hsa-miR-1226-5p	15.5	47	21	16.3333	43	11.5	145.5	61.5	53.5	0	0	2	23	49.5	39	14	4	9
hsa-miR-103b	171652	141450	132801	3634.44	4065.3	620.733	432103	226642	156030	250.667	117.9	756.798	166062	266728	202374	130.015	186.864	673.149
hsa-miR-4461	13.2367	12.4214	5.15	0.5	2	11.9	15.1951	8.73333	6.7625	0	0	6.07692	10.7744	22.2556	19.3372	0.833333	1	2
hsa-miR-4692	1	0	0.5	0	1	0	3	0	0	0	0	0	0	1	0	0	0	0
hsa-miR-5580-3p	28	35	25	10	7	0	69.4103	45	51.5	1	0	1	51.5	79.5625	69	0	0	0
hsa-miR-4657	1	0	0	0	1	0	2	0	0	0	0	0	0	1	2	0	0	0
hsa-miR-3665	0	0.333333	0	0	0	0	0	0	0	0	0	0	0	0	0	0	0	0
hsa-miR-3610	0	0	0	0	0	0	0	0	0	0	0	0	0	0	0.142857	0	0	0
hsa-miR-4767	2	0	4	0	0	0	7	3	2	0	0	0	4	0	6	0	0	0
hsa-miR-296-3p	6.5	7.33333	9	0	0	0	66.5	34.6429	11.5	0	1.5	0.833333	8.16667	9.83333	12.8333	2	1	1.5
hsa-miR-524-3p	2	2	0	0	1	0	0	0	0	0	0	0	0	0	0.5	0	0	0
hsa-miR-214-3p	0	0	0	0	0.5	3.5	5.5	0.5	1.33333	0	0	0	1	0	1	0	0	0
hsa-miR-4423-3p	1	2	2	0	0	0	7	3	1	0	0	0	2	0	1	0	0	0
hsa-miR-1197	0	0	0	0	0	0	0	0	0	0	0	0	0	0.2	0.5	0	0	0
hsa-miR-877-3p	139.547	122.55	120.608	3	1	0	336.603	175.855	141.324	0	0.25	0	118.865	164.46	173.73	0.5	0	0
hsa-miR-519c-5p	4.33333	3.66667	3.2	1.5	0.833333	0	1.66667	1.47619	1.30952	0	0	0	1	2.16667	2.30952	0	0	0
hsa-miR-6087	3.5	2.25	0.25	10.3583	21.4076	10.0833	12.25	6.25	0	0	2	2.58333	0.2	4.5	4	0.0909091	0.833333	0
hsa-miR-3141	0.105263	0	0.2	0.0526316	0	0	1.33333	0	0	0	0	0	0	0.2	0.0526316	0	0.0526316	0
hsa-miR-346	0	0	1	0	0	0	0	0	0	0	0	0	0	0	0	0	0	0
hsa-miR-27b-3p	236748	171406	188397	6251.61	4304.89	1630.45	656503	326824	200865	3129.69	1183.61	3843.89	220100	325634	241841	611.907	1179.22	1731.41
hsa-miR-21-5p	2.99652e+06	4.25752e+06	2.29243e+06	78186.9	109084	14791.4	6.2284e+06	4.4109e+06	1.88027e+06	14546.9	9157.63	37430.3	3.24257e+06	4.50451e+06	2.70873e+06	10535	7419.15	22960.5
hsa-miR-197-3p	3505.65	2793.25	2875.58	251.321	280.542	185.487	9136.21	3924.56	3260.85	20.5	6	16.5	3096.38	4633.82	4189.45	33.4936	29.5	27.1111
hsa-miR-372	33707.1	39000.2	26264.2	989.833	952	338	24492.1	16535.2	10293.5	12	8	33	25821.3	59462.2	36936.6	66	133.143	182
hsa-miR-326	350.231	224.12	218.611	109.303	97	21.1579	1378.54	756.048	675.819	15.0526	3	10	232.605	480.759	435.297	3.38596	1	8.33333
hsa-miR-24-2-5p	10131.4	5999.45	8659.92	395.733	271.444	44	23404.7	9623.27	7934.93	13	3	9	10295.8	39108.8	21463	1	4	6
hsa-miR-205-3p	1	0	0	0	0	0	0	0	0	0	0	0	0	0	0	0	0	0
hsa-miR-4786-5p	10	7	3	1	2	0	28	10	3	0	0	0.5	11.5	14	9.5	0	2	2
hsa-miR-5582-3p	310.667	139.333	181.833	3	3	0	388.1	209.5	190.926	0	0	0	188.5	469.31	192.6	0	0	1
hsa-miR-1185-1-3p	0	0	0	0	0	0	1	1.5	3	0	0	0	0	0	0	0	0	0
hsa-miR-513c-5p	0	0	1	0	0	0	4	4.5	3	0	0	0	1	0	0	0	0	0
hsa-miR-433	0	0	2	0	0	0	4	3	2	0	0	0	3	2	1	0	0	0
hsa-miR-145-5p	8	9	13	12	12	0	8	12	0	0	0	0	2	16.5	15	0	0	0
hsa-miR-5693	5	2	2	0	0	0	7	1	1	0	0	0	5	2	3	0	0	0
hsa-miR-3935	0	0	0	0	1	0	0	1	0	0	0	0	0	0	0	0	0	0
hsa-miR-602	3	4	4	1	0	0	10	11	9	0	0	0	4	13	8	0	0	1
hsa-miR-3529-3p	141852	174713	138802	801.444	1220.37	442.278	261628	182321	86395.4	199.978	108.917	649.033	134709	216339	142151	128.85	119.2	291.86
hsa-miR-2355-5p	21	24	13	1	2	0	62.5	54.2	33	0	0	0	18.3333	44	42	0	0	0
hsa-miR-4661-5p	193	404.833	120	23.5	15	22	634.917	476	277.5	3	6	16.5	147.7	280.583	137.833	11	1	8
hsa-miR-548as-3p	0	0	0	0	0	0	2	0	0	0	0	0	0	0	0	0	0	0
hsa-miR-4768-3p	3	0	1	0	0	0	1	2	0	0	0	0	2	1	4	0	0	0
hsa-miR-1250	47	51	54.0625	3	4	13	5	3	1	0	0	0	42	56	67.75	1	0	0
hsa-miR-16-5p	12298.4	8233.53	9871.38	3891.13	1636.6	69.6667	30653.5	16881.8	11574.7	125.2	43	179	11662	23811	21899.2	63.3333	28	120
hsa-miR-5582-5p	0.5	0.5	0.5	0	0	0	1.7625	1.5	0	0	0	0	0.5	2	0	0	0	0
hsa-miR-3159	61.9286	39.5	56.7857	4.16667	2.66667	0	194.266	99.0238	71.5238	2	0	0	58.1905	59.881	62.0119	1	1	0
hsa-miR-1302	0	0	0.473684	0	0	0	0.473684	0.473684	0	0	0	0	0	0	0	0	0	0
hsa-miR-187-5p	0	0	0	0	0	0	1	3	0	0	0	0	0	1	0	0	0	0
hsa-miR-514b-3p	0	1	0	0	0	0	0.342857	1	0	0	0	0	0	0	0	0	0	0
hsa-miR-1293	30.3333	36.4048	16.2	19.25	23.5	14.0667	93.8667	51	47	0	0	6.33333	43.5833	79.6667	52.75	3	6	2.05556
hsa-miR-4723-5p	0	2	1	1	0	0	6	0	2	0	0	0	4	2	2	0	0	0
hsa-miR-1225-3p	0	0	0	1	0	0	0	0	0	0	0	0	0	0	0	0	0	0
hsa-miR-4749-3p	1	0	0.5	0	0	0	0.5	0	0.5	0	0	0	0	0	3	0	0	0
hsa-miR-4502	2	2	1	0	0	0	2	7	0.833333	0	0	0	5.5	1	1	0	0	0
hsa-miR-512-5p	2	1	1	2	0	0	0	0	0	0	0	0	0	0	0	0	0	0
hsa-miR-302d-3p	0	0	0	0	0	0	1	0	0	0	0	0	0	0	0	0	0	0
hsa-miR-3177-3p	472	482.2	411	32.1111	51.2255	169	1056.31	507.225	379.5	8	5	38	380.25	703.091	488.25	22.25	11	21
hsa-miR-191-5p	188868	151127	163526	29908.2	33627.5	20620.8	471455	238396	180506	1648.67	1041.17	4181.21	184074	341041	280966	2220.58	1289.17	2294.77
hsa-miR-1976	9.07143	14.5	5.5	2	4	0	30.45	20.5	21.3333	1	0	0	17	14	15	0	0	0
hsa-miR-4687-5p	0	1.5	0	0	0	0	5	0	3.5	0	0	0	0	3	0	0	0	0

## Sheet: Supp File 1B. repeat_families
Supplemental File 1B. Read counts on repeat families
idx	DKO1.cell.1	DKO1.cell.2	DKO1.cell.3	DKO1.exo.1	DKO1.exo.2	DKO1.exo.3	DKS8.cell.1	DKS8.cell.2	DKS8.cell.3	DKS8.exo.1	DKS8.exo.2	DKS8.exo.3	DLD.cell.1	DLD.cell.2	DLD.cell.3	DLD1.exo.1	DLD1.exo.2	DLD1.exo.3
Unknown?	3.22882	5.04617	4.8491	8.11891	7.01567	0.338095	14.9829	7.64247	2.23333	1.36111	3.22067	8.46345	7.37368	11.3419	6.85857	5.47553	3.73962	6.02981
DNA?	79.6054	60.7904	64.8429	39.6397	58.4572	29.8205	180.398	82.7413	72.1593	26.9907	15.4744	27.5272	78.4674	126.879	136.802	18.8055	20.0231	20.6386
snRNA	59735.3	62718.2	46913.8	14141.8	18424.1	10305.7	161422	90690.6	55781.8	3892.65	3297.85	15535.8	63237.8	88013.6	79644	3556.52	4019.95	8724.49
Other	219.612	208.107	135.809	2196.39	1357.47	345.544	325.909	258.609	181.45	1470.01	1808.25	1888.83	191.838	387.885	401.841	1621.1	1681.99	1420.01
rRNA	996850	719489	649620	1.99607e+06	3.0473e+06	4.22263e+06	1.38691e+06	1.03054e+06	1.37303e+06	1.34377e+06	996223	1.47541e+06	879782	1.07673e+06	1.68726e+06	2.09487e+06	2.4811e+06	2.18402e+06
tRNA	54315.4	53858.5	41396.3	83576.6	120990	10832.6	133875	75688.6	53216.8	10315.9	10600	32211	65553.2	100502	91069.4	32043.8	14905.6	25563.9
LINE	357008	363303	223988	221654	270514	105706	633819	392079	266115	134228	140376	261306	311227	626885	476244	167574	146472	130203
LTR?	4.52194	5.85271	2.81961	3.3965	6.98093	1.91993	7.22992	6.65509	8.11281	14.5283	6.18057	4.40054	4.78824	15.044	12.4919	3.95886	2.23015	2.81536
scRNA	40515.4	34892.1	38321.8	73049	244917	303680	159011	95683.4	76410.7	22552.8	18638.9	70683.2	51287.9	74600.9	73403.2	31430.5	8067.61	19981.2
LINE?	0.176984	0.308333	0.714286	55.0079	67.0082	3.9619	4.28889	2.13162	0.95232	36.526	29.3987	35.9757	1.22778	3.90043	2.70595	18.8222	22.7237	21.7319
DNA	70029.6	64602.2	48127.7	37454.9	47368.8	19723.9	164884	98240.5	67680.6	20828.5	21055.7	38503.4	72356.1	133261	112332	28838.9	27030.3	22429.3
SINE	140327	146299	97932.9	118345	128752	51784	295619	185338	126011	59081.3	54319.9	90073.9	121859	245070	192784	68585.1	65201	59581.3
RNA	25.7736	13.8577	20.5883	11.3716	15.8619	4.07925	92.0255	43.621	54.9499	2.65833	1.88805	8.69357	30.1819	50.6611	88.646	7.3514	2.2964	6.73494
srpRNA	41.8738	26.6313	25.9173	511.112	254.406	47.6444	115.568	70.7711	65.6676	64.4177	38.1991	133.579	38.3701	84.389	86.9869	124.041	33.9417	57.0159
Low_complexity	2100.86	2028.94	1401.65	8785.35	10217.9	32717.6	4408.27	2710.63	2104.48	7377.79	5822.38	8338.61	2063.4	4484.75	4469.75	4174.27	2406.62	3215.77
Simple_repeat	7425.21	5655.13	5016.36	4588.81	5660.99	8018.66	10425.7	6285.73	4551.2	4380.28	3704.08	4633.16	6151.23	11779.5	9752.13	3078.34	2039.43	2102.42
LTR	130844	106922	78903.6	113273	160641	69562.1	251783	145596	108673	83808.3	85636.9	141106	129232	249729	224616	103591	102569	88698.3
SINE?	5.60449	8.13382	4.91606	24.93	39.3191	7.7451	22.6318	11.175	6.97208	10.0025	8.60412	14.6335	6.1489	20.9598	17.5786	27.8984	17.1426	8.55841
Satellite	2317.73	2267.61	1668.17	4024.68	5239.9	3212.01	4956.59	3334.68	2506.06	2827.96	2992.24	5877.29	2548.44	5222.28	4824.43	3417.28	3260.18	2803.83
RC	99.2126	87.1206	75.1759	213.337	313.679	96.758	277.613	147.549	116.343	390.479	434.722	751.863	116.798	227.602	264.248	449.941	302.195	219.869
Unknown	377.166	341.598	306.321	624.89	995.794	389.508	769.729	546.008	407.75	385.9	343.691	645.406	381.067	846.583	903.401	368.426	271.699	216.028
