# Supplementary material for: KRAS-dependent sorting of miRNA to exosomes
Source: eLife journal article supplement (doi:10.7554/elife.07197), 2015-07-01
Supplement: supp [file elife-07197-supp-v1.zip › elife_poa_e07197_Supplementary_File_2.xlsx]

## Sheet: Supp File 2A. DKO1
Supplemental File 2A: Abundant miRNAs in DKO-1
DKO-1
id	baseMean	baseMeanA	baseMeanB	foldChange	log2		Key
					FoldChange			abundant in exos
hsa-miR-320c	4153.56	161.545	10141.6	62.7788	5.97221			abundant in cells
hsa-miR-139-5p	3101.25	191.452	7465.93	38.9963	5.28526			abundant in both
hsa-miR-224-5p	2535.19	642.734	5373.87	8.36095	3.06367
hsa-miR-320d	1977.21	21.4094	4910.92	229.381	7.8416
hsa-miR-361-5p	1369.66	496.644	2679.18	5.39456	2.43151
hsa-miR-371b-3p	1456.45	677.989	2624.14	3.87047	1.95251
hsa-miR-371a-5p	1402.1	624.27	2568.84	4.11495	2.04087
hsa-miR-193b-3p	1079.3	160.643	2457.29	15.2965	3.93513
hsa-miR-1246	936.379	80.8321	2219.7	27.4606	4.77929
hsa-miR-151a-5p	949.441	247.222	2002.77	8.10111	3.01812
hsa-miR-146a-5p	594.311	63.5499	1390.45	21.8797	4.45152
hsa-miR-877-5p	634.527	357.368	1050.27	2.93889	1.55527
hsa-miR-501-3p	627.924	350.193	1044.52	2.98271	1.57662
hsa-miR-3187-3p	374.033	121.148	753.359	6.21848	2.63656
hsa-miR-96-5p	7374.16	11935.3	532.491	0.0446149	-4.48633
hsa-miR-4473	4221.17	6775.7	389.382	0.0574675	-4.12111
hsa-miR-582-3p	3694.27	6056.86	150.389	0.0248296	-5.3318
hsa-miR-32-5p	3543.95	5859.49	70.6295	0.0120539	-6.37436
hsa-miR-130b-5p	2044.64	3308.36	149.055	0.0450541	-4.4722
hsa-miR-141-5p	2021.22	3303.88	97.2335	0.0294301	-5.08656
hsa-miR-19a-3p	1486.83	2408.46	104.394	0.0433447	-4.528
hsa-miR-18a-5p	1262.93	2031.76	109.704	0.0539948	-4.21104
hsa-miR-140-5p	1267.81	1810.54	453.706	0.250591	-1.99659
hsa-miR-1247-3p	1140.01	1566.65	500.045	0.319181	-1.64755
hsa-miR-548o-3p	936.288	1403.79	235.032	0.167427	-2.5784
hsa-miR-9-5p	893.445	1403.78	127.949	0.0911465	-3.45567
hsa-miR-374a-5p	1000.02	1375.43	436.899	0.317645	-1.65451
hsa-miR-374a-3p	693.261	1137.38	27.0834	0.0238121	-5.39216
hsa-miR-21-5p	976707	1.42056e+06	310932	0.218881	-2.19178
hsa-miR-100-5p	68972.4	17726.9	145841	8.22706	3.04038
hsa-miR-221-3p	62032.1	35882.7	101256	2.82186	1.49665
hsa-miR-320a	58962.5	33877.9	96589.4	2.8511	1.51152
hsa-miR-148a-3p	180248	266817	50394.1	0.188872	-2.40452
hsa-let-7i-5p	132174	195478	37217.5	0.190392	-2.39295
hsa-miR-200a-3p	91182.7	131202	31153.9	0.23745	-2.0743
hsa-miR-222-3p	12367.8	3489.91	25684.5	7.35967	2.87964
hsa-miR-423-5p	13866.7	6751.83	24539	3.63441	1.86172
hsa-miR-3184-3p	13866.7	6751.83	24539	3.63441	1.86172
hsa-miR-320b	8359.66	1170.21	19143.8	16.3594	4.03205
hsa-miR-27b-3p	60190.6	88487	17746.1	0.20055	-2.31797
hsa-miR-103b	44811.7	66130.5	12833.3	0.194061	-2.36542
hsa-miR-103a-3p	44811.7	66130.5	12833.3	0.194061	-2.36542
hsa-miR-186-5p	5455.36	2219.32	10309.4	4.6453	2.21577
hsa-miR-7-5p	128346	207103	10210.2	0.0493003	-4.34226
hsa-miR-196a-5p	5638.94	3359.88	9057.52	2.69578	1.4307
hsa-miR-629-5p	4243.71	1658.83	8121.04	4.89565	2.2915
hsa-miR-425-5p	36195.9	54996.1	7995.59	0.145385	-2.78205
hsa-miR-30e-5p	15368.1	21484.9	6192.91	0.288245	-1.79463
hsa-miR-148b-3p	13667.9	19157	5434.41	0.283678	-1.81767
hsa-miR-200a-5p	27110.7	42174.7	4514.75	0.107049	-3.22366
hsa-miR-20a-5p	38588.4	61368.4	4418.37	0.0719974	-3.79591
hsa-miR-17-5p	15310.2	22647.4	4304.45	0.190064	-2.39544
hsa-miR-3529-3p	42236.5	68160.6	3350.44	0.0491552	-4.34651
hsa-miR-372	10125.7	14713.4	3244.15	0.220489	-2.18122
hsa-miR-24-2-5p	2657.49	3682.61	1119.81	0.304081	-1.71747
hsa-miR-101-3p	17076.2	27808	978.411	0.0351845	-4.82892
hsa-miR-141-3p	2001.87	2753.3	874.736	0.317705	-1.65424
hsa-miR-340-5p	2829.59	4146.44	854.303	0.206033	-2.27905
hsa-miR-19b-3p	3731.08	5746.95	707.269	0.123069	-3.02247
hsa-miR-126-3p	1478.7	2016.25	672.364	0.333473	-1.58436
hsa-miR-106b-5p	3588.31	5550.73	644.691	0.116145	-3.106
hsa-miR-15b-5p	1487.44	2061.35	626.572	0.303963	-1.71803
hsa-miR-221-5p	1487.12	2066.98	617.322	0.298658	-1.74343
hsa-miR-148a-5p	1705.03	2443.23	597.737	0.24465	-2.03121

## Sheet: Supp File 2B. DKs8
Supplemental File 2B: Abundant miRNAs in DKs-8
id	baseMean	baseMeanA	baseMeanB	foldChange	log2		Key
					FoldChange			abundant in exos
hsa-miR-320b	5847.15	429.407	11264.9	26.2336	4.71334			abundant in cells
hsa-miR-146b-5p	4190.25	993.695	7386.8	7.43367	2.89407			abundant in both
hsa-miR-1246	2953.99	35.5088	5872.47	165.381	7.36965
hsa-miR-320c	2745.05	72.4879	5417.61	74.7382	6.22377
hsa-miR-629-5p	1859.18	672.036	3046.33	4.53299	2.18046
hsa-let-7c	1381.95	346.058	2417.84	6.9868	2.80463
hsa-miR-320d	1205.61	9.94367	2401.27	241.488	7.9158
hsa-miR-224-5p	1204.76	543.31	1866.21	3.43488	1.78026
hsa-miR-4792	167.287	0.0507634	334.523	6589.84	12.686
hsa-miR-96-5p	1905.79	3726.12	85.4528	0.0229335	-5.4464
hsa-miR-107	1543.38	2830.59	256.176	0.0905029	-3.46589
hsa-miR-4473	1140.25	2221.29	59.2116	0.0266564	-5.22937
hsa-miR-19b-3p	1156.31	2102.63	209.982	0.0998662	-3.32386
hsa-miR-106b-5p	1006.68	1912.04	101.313	0.0529867	-4.23823
hsa-miR-372	871.356	1604.64	138.068	0.0860429	-3.5388
hsa-miR-32-5p	749.749	1483.14	16.3617	0.0110319	-6.50218
hsa-miR-24-2-5p	646.942	1220.79	73.0959	0.059876	-4.06188
hsa-miR-141-5p	531.646	1021.68	41.6074	0.0407243	-4.61797
hsa-let-7a-5p	125343	43974.8	206712	4.70068	2.23287
hsa-let-7b-5p	108507	24501.9	192512	7.85702	2.97398
hsa-let-7f-5p	72328.1	46075.4	98580.9	2.13956	1.09731
hsa-miR-182-5p	29414	10405.4	48422.7	4.65362	2.21835
hsa-miR-183-5p	25013.9	14375.9	35651.9	2.47997	1.31032
hsa-miR-423-3p	19297.3	10780.9	27813.6	2.57989	1.36731
hsa-miR-3184-5p	18571.7	10218.7	26924.8	2.63486	1.39773
hsa-miR-423-5p	10880.5	2605.49	19155.5	7.35198	2.87813
hsa-miR-3184-3p	10880.5	2605.49	19155.5	7.35198	2.87813
hsa-miR-29a-3p	13242.3	18116.4	8368.21	0.461913	-1.11431
hsa-miR-200a-3p	33495.6	58793.4	8197.83	0.139435	-2.84234
hsa-miR-7-5p	28005.5	49048.3	6962.74	0.141957	-2.81647
hsa-miR-22-3p	7484.22	10284.5	4683.96	0.45544	-1.13467
hsa-miR-28-3p	2985.18	1356.11	4614.26	3.40257	1.76663
hsa-miR-200a-5p	6911.75	10875.4	2948.15	0.271086	-1.88318
hsa-miR-103b	13729.1	24736.4	2721.83	0.110034	-3.18398
hsa-miR-103a-3p	13729.1	24736.4	2721.83	0.110034	-3.18398
hsa-miR-93-5p	5495.27	8531.91	2458.64	0.288169	-1.79501
hsa-miR-3529-3p	9236.23	16144.3	2328.15	0.144209	-2.79377
hsa-miR-429	12579.4	22941.6	2217.29	0.0966491	-3.3711
hsa-miR-1307-3p	3372.22	5136.3	1608.13	0.313092	-1.67534
hsa-miR-425-5p	10344.1	19144.6	1543.69	0.0806333	-3.63248
hsa-miR-26b-5p	2603.15	3777.97	1428.34	0.37807	-1.40327
hsa-miR-101-3p	5217.27	9248.84	1185.71	0.128201	-2.96353
hsa-let-7a-3p	1815.78	2573.1	1058.45	0.411352	-1.28156
hsa-miR-100-5p	2239.43	3422.42	1056.44	0.308681	-1.69581
hsa-miR-20a-5p	12129.5	23315.5	943.431	0.0404636	-4.62723
hsa-miR-98-5p	1847.85	2766.3	929.396	0.33597	-1.57359
hsa-miR-30e-5p	3366.33	5974.14	758.523	0.126968	-2.97747
hsa-miR-17-5p	5244.76	9787.09	702.431	0.0717712	-3.80045
hsa-miR-196b-5p	1335.68	2061.39	609.972	0.295903	-1.7568
hsa-miR-185-5p	1390.1	2268.07	512.125	0.225797	-2.1469
hsa-miR-374c-3p	851.697	1197.16	506.23	0.422858	-1.24175
hsa-miR-374b-5p	851.697	1197.16	506.23	0.422858	-1.24175
hsa-miR-126-3p	1097.06	1750.01	444.101	0.25377	-1.97841
hsa-miR-484	1275.77	2123.82	427.717	0.20139	-2.31193
hsa-miR-340-5p	1280.96	2136.23	425.698	0.199276	-2.32716
hsa-miR-582-3p	1393.42	2383.98	402.862	0.168987	-2.56502
hsa-miR-1180	1007.37	1637.72	377.024	0.230213	-2.11896
hsa-miR-194-5p	1640.7	2905.4	375.998	0.129413	-2.94994
hsa-miR-27a-5p	1816.71	3261.18	372.252	0.114147	-3.13104

## Sheet: Supp File 2C. DLD1
Supplemental File 2C: Abundant miRNAs in DLD-1
DLD-1
id	baseMean	baseMeanA	baseMeanB	foldChange	log2		Key
					FoldChange			abundant in exos
hsa-miR-371b-3p	568.869	174.088	963.65	5.53543	2.46869			abundant in cells
hsa-miR-371a-5p	550.56	162.443	938.677	5.77849	2.53069			abundant in both
hsa-miR-4497	153.871	1.17023	306.571	261.975	8.03329
hsa-miR-486-5p	152.972	1.77559	304.169	171.306	7.42043
hsa-miR-345-5p	591.141	950.341	231.941	0.244061	-2.03468
hsa-miR-21-3p	519.398	852.148	186.647	0.219031	-2.19079
hsa-miR-486-3p	93.275	1.10114	185.449	168.416	7.39589
hsa-miR-23b-3p	529.496	900.942	158.05	0.175427	-2.51105
hsa-miR-221-5p	430.388	721.584	139.192	0.192898	-2.37409
hsa-miR-96-5p	2738.78	5450.58	26.9752	0.00494906	-7.65863
hsa-miR-24-2-5p	1234.82	2437.17	32.4741	0.0133245	-6.22977
hsa-miR-19b-3p	1224.86	2403.02	46.6925	0.0194308	-5.68551
hsa-miR-106b-5p	1197.76	2358.72	36.7975	0.0156006	-6.00225
hsa-miR-32-5p	1153.39	2303.83	2.95611	0.00128313	-9.60612
hsa-miR-107	1113.19	2133.33	93.0475	0.0436161	-4.519
hsa-miR-141-5p	754.612	1489.34	19.8876	0.0133533	-6.22666
hsa-miR-141-3p	660.927	1264.35	57.5014	0.0454789	-4.45866
hsa-miR-29b-3p	541.642	1047.61	35.6733	0.0340521	-4.87611
hsa-miR-21-5p	250838	390340	111337	0.28523	-1.8098
hsa-let-7i-5p	39348.5	59876.9	18820	0.314312	-1.66973
hsa-miR-100-5p	11710.8	5028.03	18393.6	3.65821	1.87114
hsa-miR-26a-5p	33098.3	47871.2	18325.4	0.382806	-1.38532
hsa-let-7g-5p	28948.1	46743.4	11152.8	0.238596	-2.06736
hsa-miR-27b-3p	19832.2	29238.5	10425.9	0.356583	-1.48769
hsa-miR-28-3p	4573.47	1138.38	8008.57	7.03508	2.81457
hsa-miR-24-3p	23564.6	39218.2	7911.06	0.201719	-2.30958
hsa-miR-29a-3p	14700.8	24355.1	5046.53	0.207206	-2.27086
hsa-miR-7-5p	29834.2	55150.5	4517.84	0.0819184	-3.60967
hsa-miR-200a-3p	31471.7	58892.2	4051.2	0.0687902	-3.86165
hsa-miR-3074-5p	11182.3	18591.2	3773.42	0.202969	-2.30067
hsa-miR-22-3p	9177.74	14599.8	3755.67	0.257241	-1.95881
hsa-miR-27a-3p	7324.72	12014.8	2634.58	0.219277	-2.18917
hsa-miR-103b	13008.5	23412.6	2604.34	0.111237	-3.16829
hsa-miR-103a-3p	13008.5	23412.6	2604.34	0.111237	-3.16829
hsa-miR-429	12120.5	22436.1	1804.94	0.0804478	-3.6358
hsa-miR-181a-5p	3989.49	6259.27	1719.7	0.274745	-1.86383
hsa-miR-3529-3p	9833.23	18167.9	1498.52	0.0824815	-3.59979
hsa-miR-93-5p	6037.92	10653.5	1422.39	0.133514	-2.90494
hsa-miR-425-5p	11837.7	22367.2	1308.21	0.0584877	-4.09572
hsa-miR-372	2751.85	4364.76	1138.93	0.260939	-1.93822
hsa-let-7a-3p	1991.31	3130.08	852.536	0.272369	-1.87637
hsa-miR-27a-5p	1853.6	3078.81	628.395	0.204103	-2.29263
hsa-miR-101-3p	4549.63	8475.91	623.349	0.0735436	-3.76526
hsa-miR-17-5p	5352.18	10092	612.306	0.0606721	-4.04282
hsa-miR-484	1385.4	2191.33	579.463	0.264435	-1.91902
hsa-miR-16-5p	1319.52	2078.41	560.632	0.269741	-1.89035
hsa-miR-26b-5p	2306.15	4081.26	531.046	0.130118	-2.94211
hsa-miR-20a-5p	13316.6	26122.7	510.447	0.0195403	-5.6774
hsa-miR-30e-5p	4267.05	8049.63	484.465	0.0601847	-4.05446
hsa-miR-196b-5p	1238.97	2016.2	461.749	0.22902	-2.12646
hsa-miR-374c-3p	784.211	1218.93	349.495	0.286724	-1.80227
hsa-miR-374b-5p	784.211	1218.93	349.495	0.286724	-1.80227
hsa-miR-185-5p	1136.67	1935.92	337.417	0.174293	-2.52042
hsa-miR-194-5p	963.773	1658.62	268.929	0.16214	-2.62469
hsa-miR-130b-5p	688.961	1118.74	259.178	0.231669	-2.10986
hsa-miR-98-5p	1698.05	3176.87	219.218	0.0690044	-3.85717
hsa-miR-582-3p	1051.99	1928.52	175.454	0.0909784	-3.45833
hsa-miR-340-5p	872.217	1622.95	121.484	0.0748542	-3.73977
hsa-miR-4473	1309.93	2508.77	111.082	0.0442772	-4.49729
