# Supplementary figures and images for: KRAS-dependent sorting of miRNA to exosomes
Source: eLife journal article supplement (doi:10.7554/elife.07197), 2015-07-01

**DKO-1 cell**

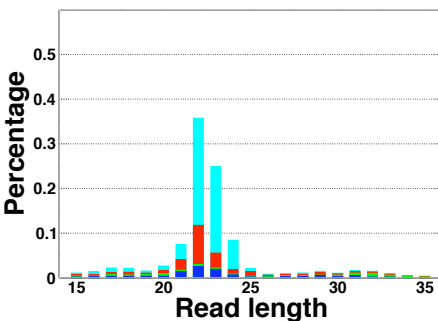

**DKs-8 cell**

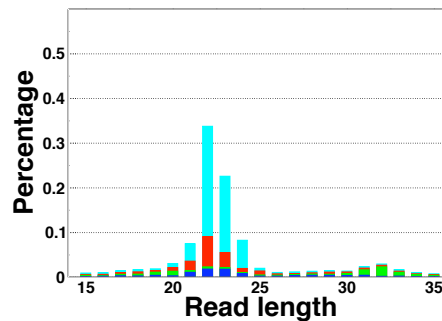

**DLD-1 cell**

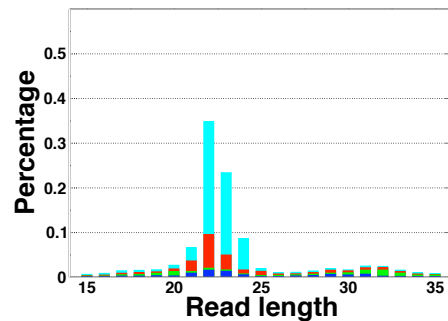

**DKO-1 exo**

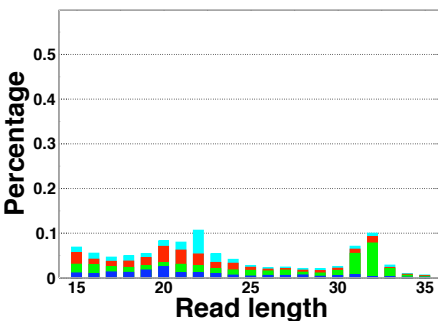

**DKs-8 exo**

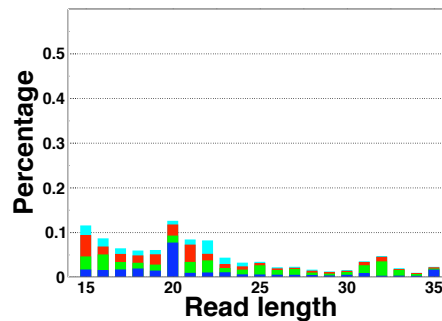

**DLD-1 exo**

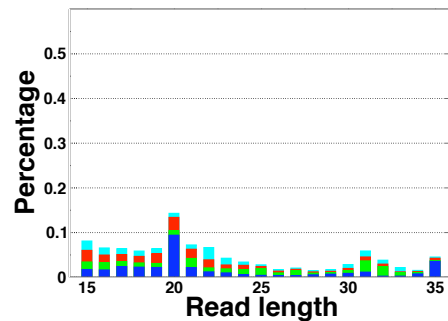

Supplement: supp [file elife-07197-supp-v1.zip › elife_poa_e07197_Figure_1_figure_supplement_1.pdf]

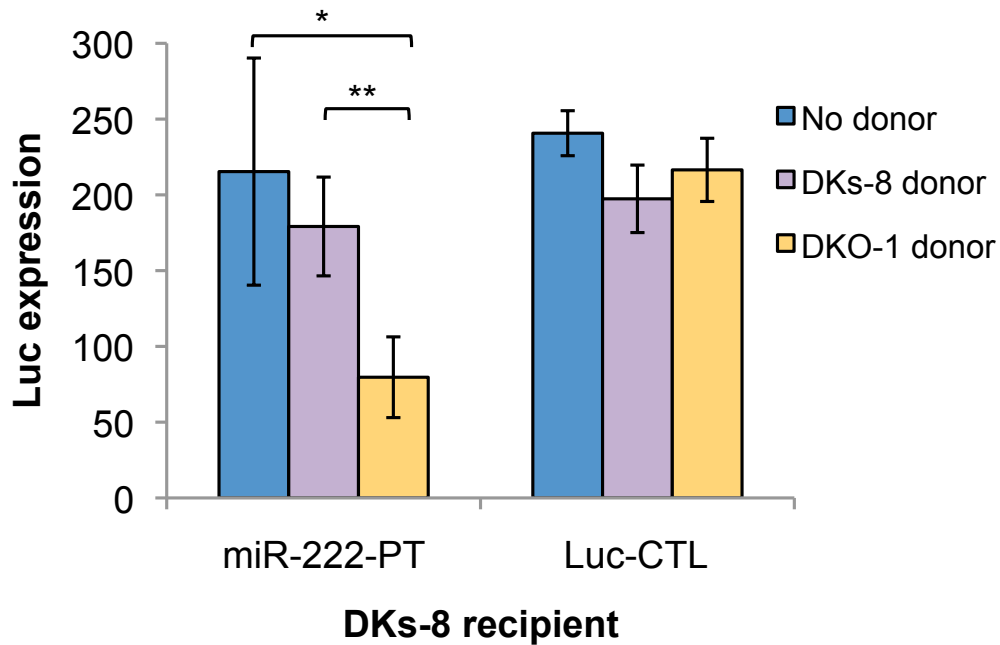

Supplement: supp [file elife-07197-supp-v1.zip › elife_poa_e07197_Figure_6_figure_supplement_3.pdf]

## Cell

DKO-1

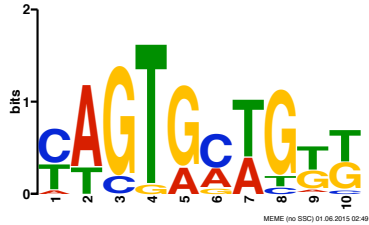

DKs-8

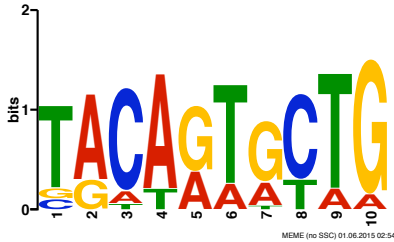

DLD-1

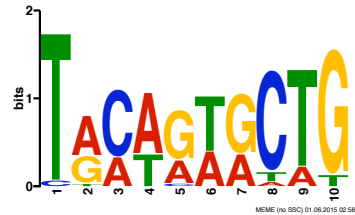

## Exosomes

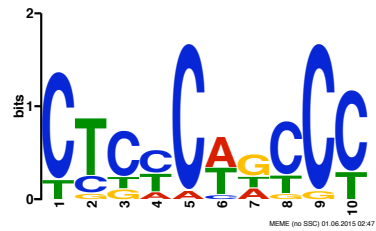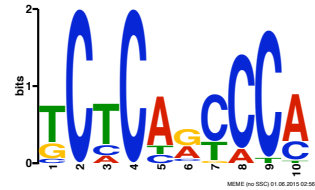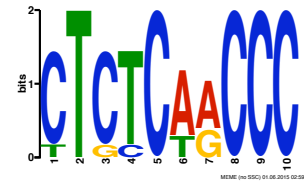

Supplement: supp [file elife-07197-supp-v1.zip › elife_poa_e07197_Figure_4_figure_supplement_3.pdf]

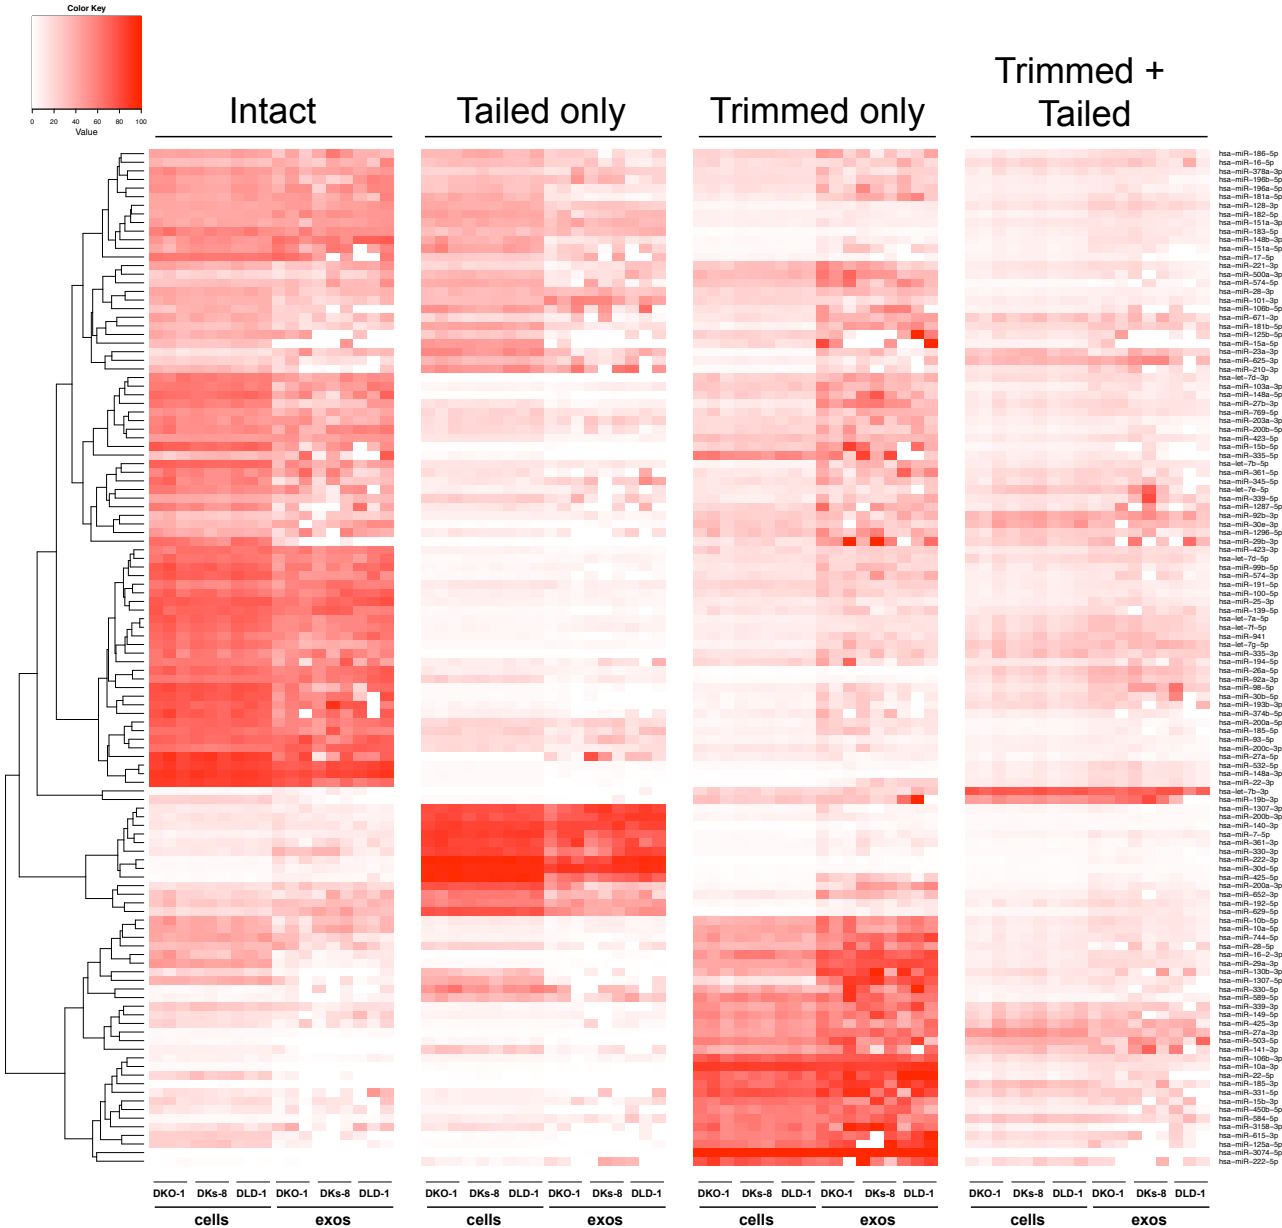

Supplement: supp [file elife-07197-supp-v1.zip › elife_poa_e07197_Figure_4_figure_supplement_2.pdf]

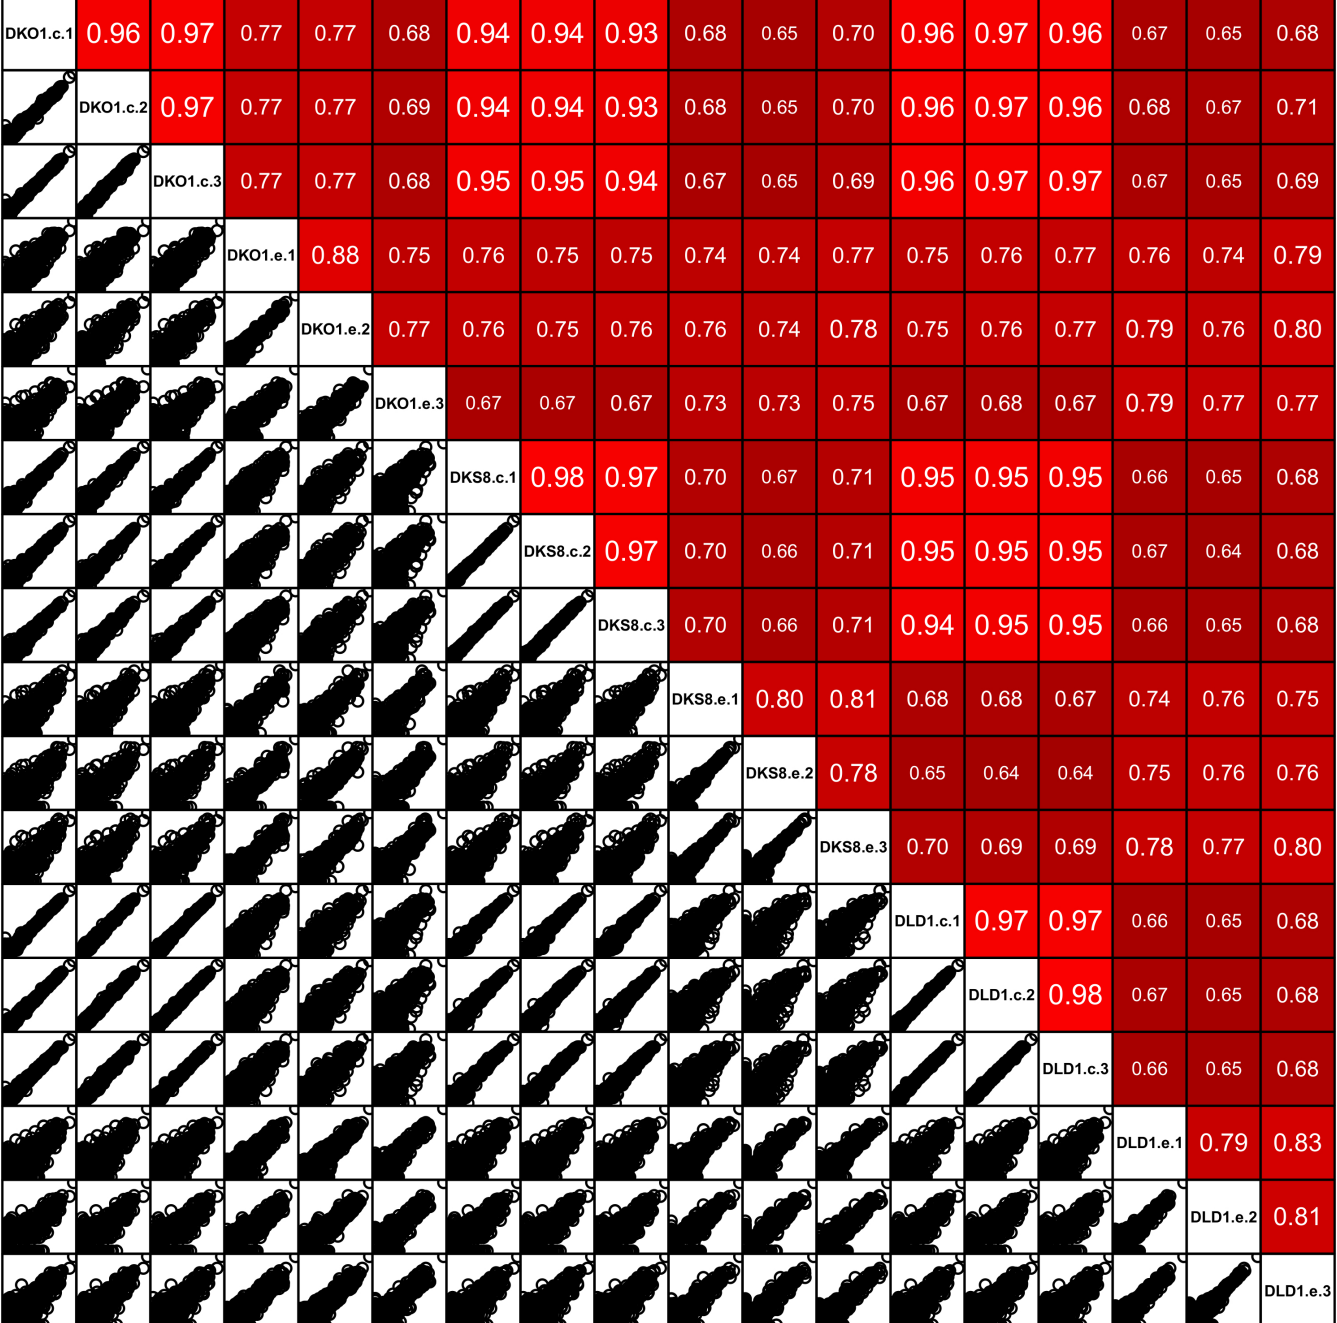

Supplement: supp [file elife-07197-supp-v1.zip › elife_poa_e07197_Figure_2_figure_supplement_2.pdf]

NTA A

DKO-1

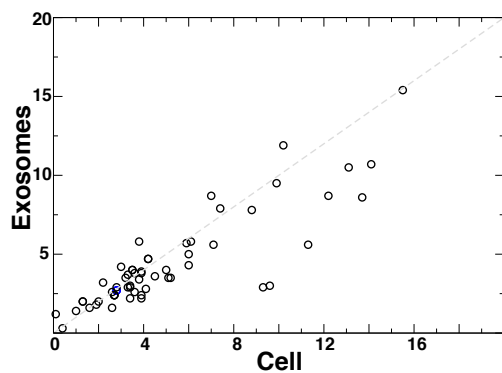

DKs-8

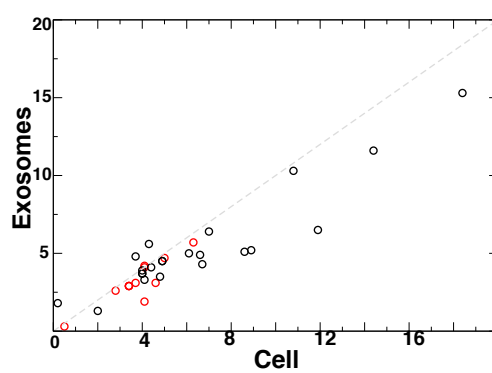

DLD1

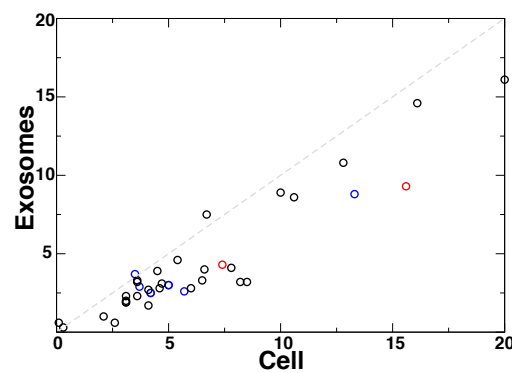

NTA C

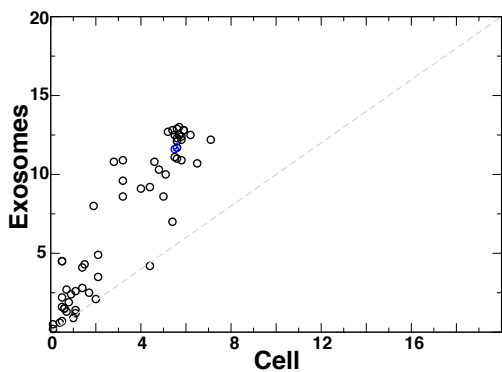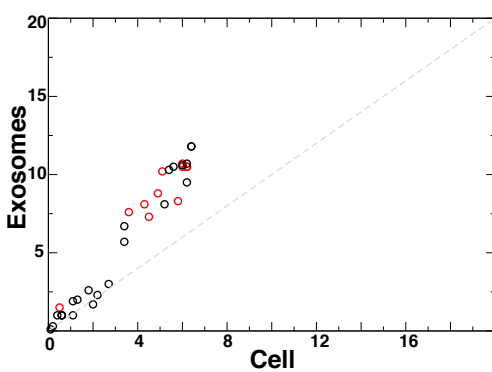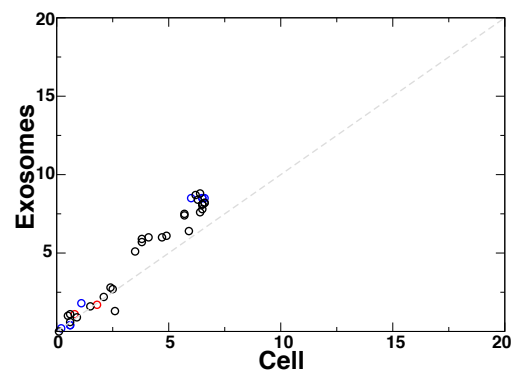

NTA G

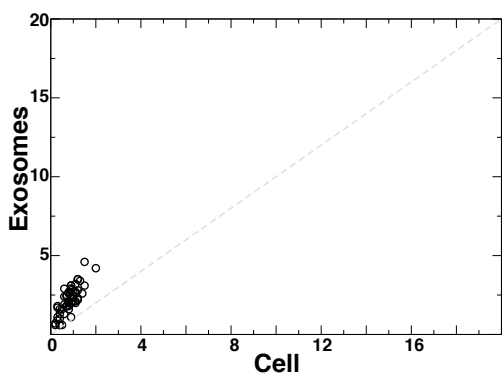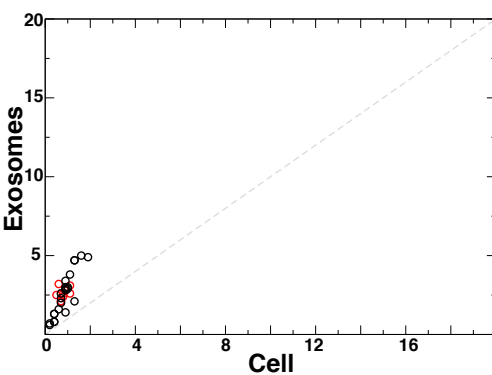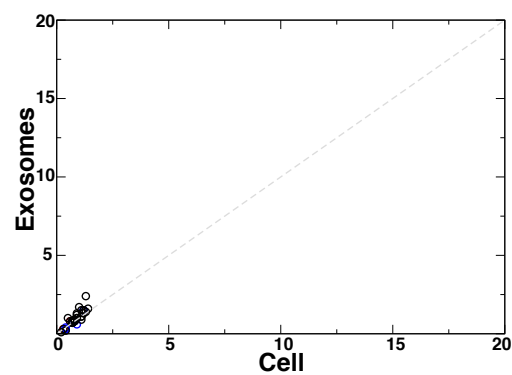

NTA T

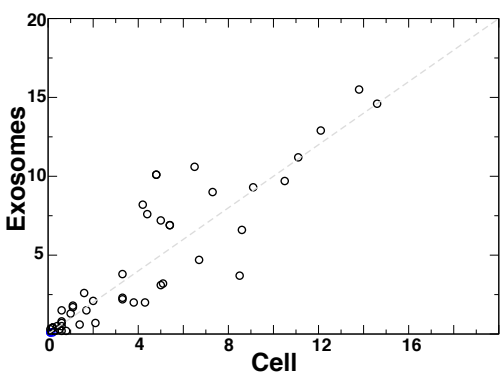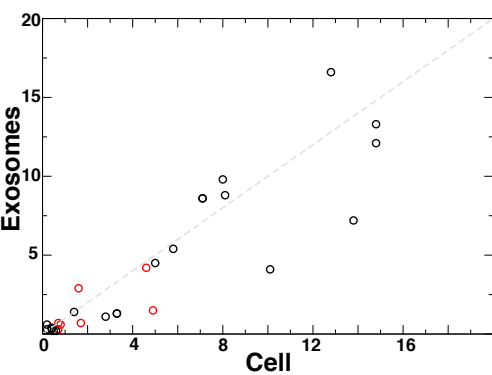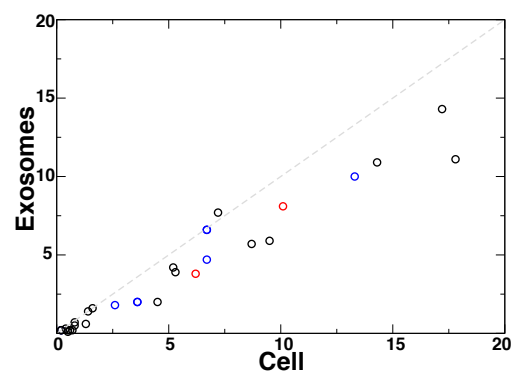

Supplement: supp [file elife-07197-supp-v1.zip › elife_poa_e07197_Figure_4_figure_supplement_1.pdf]

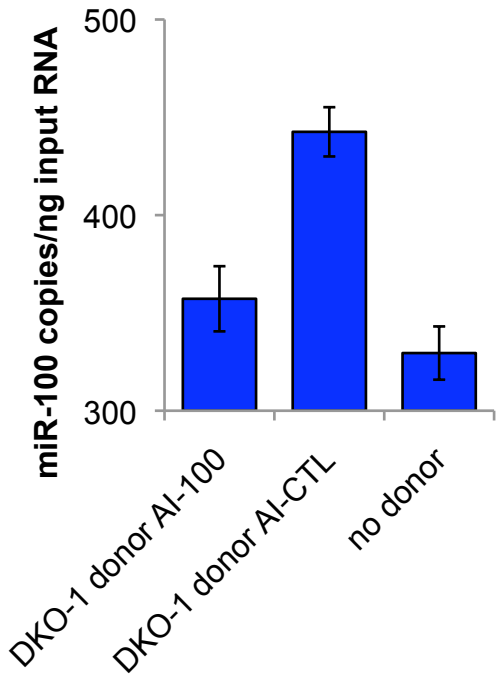

Supplement: supp [file elife-07197-supp-v1.zip › elife_poa_e07197_Figure_6_figure_supplement_2.pdf]
